1 Title

2 The intrinsically disordered protein SPE-18 promotes localized assembly of the major  
3 sperm protein in *C. elegans* spermatocytes

4  
5 Authors

6 Kari L. Price<sup>1,2,5</sup>, Marc Presler<sup>1,3,5</sup>, Christopher M. Uyehara<sup>1,4</sup>, and Diane C. Shakes<sup>1,#</sup>

7  
8 Affiliations

9 <sup>1</sup>Department of Biology, William & Mary, Williamsburg, VA 23187, USA

10

11 Current Affiliations

12 <sup>2</sup>Department of Genetics, Yale University School of Medicine, New Haven, CT

13 <sup>3</sup>Applied BioMath LLC, Concord, MA

14 <sup>4</sup>Department of Genetics, The University of North Carolina at Chapel Hill, Chapel Hill,  
15 NC

16

17 #Author for correspondence

18

19 Corresponding author e-mail: [dcshak@wm.edu](mailto:dcshak@wm.edu)

20

21 <sup>5</sup>Co-first authors

22

23 **Keywords:** major sperm protein, intrinsically disordered protein, *Caenorhabditis*  
24 *elegans*, spermatogenesis, cytoskeletal assembly, *spe-18*

25

26 Running title

27 SPE-18 localizes MSP assembly

- 1 Summary Statement
- 2 Intrinsically disordered proteins are increasingly recognized as key regulators of
- 3 localized cytoskeletal assembly. Expanding that paradigm, SPE-18 localizes MSP
- 4 assembly within *C. elegans* spermatocytes.

1     **ABSTRACT**

2

3     Many specialized cells use unconventional strategies of cytoskeletal control. Nematode  
4     spermatocytes discard their actin and tubulin following meiosis, and instead employ the  
5     regulated assembly/disassembly of the Major Sperm Protein (MSP) to drive sperm  
6     motility. However prior to the meiotic divisions, MSP is effectively sequestered as it  
7     exclusively assembles into paracrystalline structures called fibrous bodies (FBs). The  
8     accessory proteins that direct this sequestration process have remained mysterious.  
9     This study reveals SPE-18 as an intrinsically disordered protein that that is essential for  
10    MSP assembly within FBs. In *spe-18* mutant spermatocytes, MSP remains cytosolic,  
11    and the cells arrest in meiosis. In wildtype spermatocytes, SPE-18 localizes to pre-FB  
12    complexes and functions with the kinase SPE-6 to recruit MSP. Changing patterns of  
13    SPE-18 localization revealed unappreciated complexities in FB maturation. Later, within  
14    newly individualized spermatids, SPE -18 is rapidly lost, yet SPE-18 loss alone is  
15    insufficient for MSP disassembly. Our findings reveal an alternative strategy for  
16    sequestering cytoskeletal elements, not as monomers but in localized, bundled  
17    polymers. Additionally, these studies provide an important example of disordered  
18    proteins promoting ordered cellular structures.

## 1 INTRODUCTION

2

3 The ability of cells to move, divide, and assume specific cell shapes requires a  
4 cytoskeleton that can reversibly assemble into a wide range of structures. Core to this  
5 flexibility is the intrinsic capacity of core molecular subunits to polymerize into filaments.  
6 The subsequent process of regulating how, when, and where these filaments assemble  
7 into larger molecular superstructures is directed by a wide diversity of modifier and  
8 accessory proteins (Hohmann and Dehghani, 2019; Rottner et al., 2017; Goodson and  
9 Jonasson, 2018). Current concepts of cytoskeletal regulation have been dominated by  
10 functional studies of actin and tubulin and their interactions with diverse accessory  
11 proteins (Svitkina, 2018; Buracco et al., 2019; Brouhard and Rice, 2018; Bodakuntla et  
12 al., 2019; de Forges et al., 2012). However, a full understanding of cytoskeletal control  
13 requires that we also consider less-studied proteins whose properties challenge our  
14 standard assumptions.

15

16 One such protein is the nematode Major Sperm Protein (MSP), whose  
17 assembly/disassembly dynamics power the crawling motility of nematode spermatozoa  
18 (Klass and Hirsh, 1981; Sepsenwol et al., 1989; Italiano et al. 1996; and reviewed in  
19 Roberts and Stewart, 2012; Smith, 2014). Although MSP-based motility appears  
20 superficially similar to its actin-based counterpart, the molecular mechanisms are  
21 distinct. Much of what we know about MSP dynamics was gleaned from the parasitic  
22 nematode *Ascaris*, whose size and sperm number make *Ascaris* sperm amenable for  
23 biochemical studies. MSP lacks nucleotide binding sites and is quite small, only 14kDa  
24 (Roberts, 2005). Importantly, while polarity is a hallmark of actin and tubulin assembly,  
25 MSP monomers form symmetric homodimers that subsequently form apolar filaments  
26 (Bullock et al., 1998). Because MSP filaments lack polarity, they are not associated with  
27 molecular motors, and their unidirectional growth requires accessory proteins. *In vitro*  
28 comet assays show that the integral membrane protein MPOP is sufficient for MSP  
29 polymerization (LeClaire et al., 2003). However, within crawling spermatozoa, the  
30 localized assembly of MSP filaments involves several additional factors including a  
31 serine/threonine (ser/thr) kinase MPAK, a filament assembly factor MFP2 that is

1 activated by MPAK, a growing end capping protein MFP1, and a filament stabilizing  
2 factor MFP3 (Roberts and Stewart, 2012). Disassembly of MSP filaments at the base of  
3 the pseudopod involve dephosphorylation of MFP3 by a PP2A phosphatase (Yi et al.,  
4 2009).

5  
6 Non-flagellated, crawling spermatozoa are a defining feature of the phylum Nematoda,  
7 and these MSP-propelled cells are both remarkably speedy (Italiano et al., 1999) and  
8 highly efficient; in the hermaphroditic species *Caenorhabditis elegans*, every sperm  
9 successfully fertilizes an oocyte (Singson, 2001). Yet the developmental program  
10 required to produce these spermatozoa includes both assets and challenges. In  
11 *Caenorhabditis elegans* where it has been best studied, spermatogenesis occurs in a  
12 linear developmental sequence along the length of the gonad (Fig. 1A). Instead of  
13 taking days to weeks as in *Drosophila* and vertebrates, progression through the stages  
14 of meiotic prophase takes less than 24 hours (Jarmillo-Lambert et al., 1999; Fig. 1A, C,  
15 D), and post-meiotic development is abbreviated to minutes rather than days (Chu and  
16 Shakes, 2013). Two key factors account for the brevity of the post-meiotic process.  
17 First, instead of having to remodel their actin and tubulin into specialized structures  
18 following the meiotic divisions, nematode spermatocytes discard their actin and tubulin  
19 into a central residual body and MSP takes over as the core cytoskeletal element in  
20 haploid sperm (Nelson et al., 1982; Ward, 1986; Winter et al., 2017; Fig. 1E,F). Second,  
21 during meiotic prophase, nematode spermatocytes must synthesize and pre-package all  
22 of the components needed to support post-meiotic sperm functions. Global transcription  
23 ceases near the end of meiotic prophase, precluding any post-meiotic burst of sperm-  
24 specific transcription (Shakes et al., 2009); and protein synthesis ceases as the cell's  
25 ribosomes are discarded into the residual body (Ward et al, 1981). These efficiencies  
26 are countered by the challenge of how to control the potentially disruptive random self-  
27 assembly of MSP as MSP levels rise to compromise 10-15% of the total and 40% of the  
28 soluble cellular protein (Roberts, 2005).

29  
30 Developing spermatocytes address this challenge by assembling MSP into a distinct,  
31 stable, and sequestered form (Fig. 1). Little is known about the accessory proteins that

1 govern this alternate mode of MSP assembly. However, imaging in *C. elegans* reveals  
2 the following sequence. MSP is first detectable in the cytosol of spermatocytes during  
3 meiotic prophase, specifically in mid-pachytene spermatocytes when other sperm  
4 function proteins are first synthesized (Chu and Shakes, 2013; Fig. 1C,D). Then,  
5 towards the end of meiotic prophase (karyosome stage), MSP packs into symmetrically  
6 elongating structures called fibrous bodies (FBs) (Fig 1B). These individual FBs develop  
7 in close association with Golgi-derived organelles known as a membranous organelles  
8 (MOs) (Roberts et al.,1986; Fig. 1B). These FBs are filled with parallel 4.5 nm filaments  
9 (Roberts et al, 1986) that contrast with the 11 nm diameter filaments involved in sperm  
10 motility (King et al., 1994; Bullock et al., 1998). As MSP is synthesized, its localized  
11 polymerization at FBs promotes both FB growth and MSP sequestration. MSP remains  
12 locked in these FB structures through the post-meiotic partitioning process during which  
13 FB-MO complexes partition to individual spermatids and away from the central residual  
14 body (Fig. 1E-F). Once spermatids detach from the residual body, the FB-MO  
15 complexes disassociate, the MOs dock with the plasma membrane, and the FBs  
16 disassemble into MSP dimers (Roberts et al., 1986).

17  
18 The packing of MSP into FB-MO complexes is hypothesized not only to prevent MSP  
19 from interfering with the actin and tubulin mediated events of meiotic chromosome  
20 segregation and cell division (Chu and Shakes, 2013) but also to facilitate MSP  
21 partitioning to spermatids during the post-meiotic budding division (Nishimura and  
22 L'Hernault, 2010, Fig. 1E-F). However, the necessity of MSP sequestration has never  
23 been directly addressed. Additionally, little is known about the composition of FBs. They  
24 are assumed to consist solely or largely of MSP, but in principle would require their own  
25 set of accessory proteins, like those required to mediate MSP-mediated motility.

26  
27 Here, we identify *spe-18*, a gene identified in a screen for spermatogenesis-defect  
28 mutants, as an essential factor in nematode spermatogenesis and FB assembly. In the  
29 absence of SPE-18, MSP remains cytosolic rather than assembling into FBs, and no  
30 haploid sperm are produced as the developing spermatocytes arrest without undergoing  
31 proper meiotic divisions. We show that the *spe-18* gene encodes an intrinsically

1 disordered protein, whose subcellular localization pattern within wild type and mutant  
2 spermatocytes suggests that it functions to both localize and structure FB assembly.

3

## 4 RESULTS

5

### 6 *spe-18(hc133)* mutants produce arrested spermatocytes with cytosolic MSP

7

8 Until recently, the only factor known to be required for the initial assembly of MSP into  
9 FBs was the ser/thr kinase SPE-6. In *spe-6* mutant spermatocytes, MSP remains  
10 cytosolic, and the spermatocytes arrest development without completing the meiotic  
11 divisions or undergoing cytokinesis (Varkey et al., 1993; Muhlrاد and Ward, 2002; Fig  
12 2A). To identify other factors required for the assembly of MSP into FBs, we examined  
13 other spermatocyte arrest mutants for defects in MSP assembly. One proved to be the  
14 early acting spermatogenesis-specific transcription factor *spe-44* (Kulkarni et al., 2012),  
15 while the other was *spe-18(hc133)*, previously annotated as *spe-7* (Kulkarni et al., 2012;  
16 Chu and Shakes, 2013) and originally isolated in a screen for spermatogenesis-  
17 defective mutants by D. Shakes and S. L'Hernault (Fig. 2A). To further characterize  
18 *spe-18(hc133)* mutants, we first confirmed that they exhibited the standard  
19 characteristics of SPE mutants; namely that mutant hermaphrodites produce few or no  
20 self-progeny but produce cross-progeny when mated to wildtype males (L'Hernault et  
21 al., 1988; Nishimura and L'Hernault, 2012). This result indicates that sperm not oocytes  
22 are responsible for the fertility defect. To determine if the mutation was temperature-  
23 sensitive, we analyzed the self-fertility of mutant hermaphrodites at three temperatures  
24 (Table 1). In every case, control hermaphrodites produced >100 progeny and a small  
25 number of unfertilized oocytes. These brood sizes are lower than wildtype but reflect the  
26 lower fertility related to both the *unc-4* morphological marker and the *him-8* (high  
27 incidence of males) mutation that used to increase the number of males. In contrast,  
28 *spe-18* hermaphrodites produced no embryos and laid only a small number of  
29 unfertilized oocytes. While most temperature-sensitive mutants exhibit more severe  
30 defects at elevated temperatures, the self-fertility defect of *spe-18* hermaphrodites was  
31 mildly cold-sensitive; *spe-18* hermaphrodites were completely infertile at 16°C, but at

1 25°C, they laid more unfertilized oocytes and produced as many as eight offspring. In  
2 no case did we detect dead embryos, suggesting that when fertilization-competent  
3 sperm were produced, they generated viable offspring.

4  
5 Analysis of isolated and flattened male gonads revealed that *spe-18* spermatocytes  
6 have defects in both meiotic chromosome segregation and cytokinesis. Control gonads  
7 included spermatocytes at all stages of development including a small number of  
8 meiotically dividing spermatocytes and large numbers of round, haploid spermatids (Fig.  
9 2B). In contrast, *spe-18* gonads lacked haploid spermatids and instead accumulated  
10 large numbers of spermatocytes that were the size of primary spermatocytes (Fig. 2C-  
11 D). Like the hermaphrodite self-fertility, the relative severity of the meiotic chromosome  
12 segregation defects was also mildly cold-sensitive. Although most of these chromosome  
13 segregation phenotypes were observed at all temperatures, mutant spermatocytes most  
14 typically arrested with a single chromatin cluster at 16°C (Fig. 2C), two chromatin  
15 clusters at 20°C (data not shown), and 3-4 chromatin clusters at 25°C (Fig. 2D). With  
16 the exception of a few spermatocytes at 25°C, spermatocytes failed to undergo either  
17 the standard myosin II based cytokinesis following anaphase I or the distinct myosin VI  
18 based budding division that normally follows anaphase II (Ward et al., 1981; Winter et  
19 al., 2017; Hu et al., 2019).

20  
21 SPE-18 is conserved in diverse nematodes and is predicted to contain extended  
22 intrinsically disordered regions

23  
24 To better understand the molecular role of SPE-18 in spermatogenesis, we first needed  
25 to clone the *spe-18* gene. We mapped the *hc133* mutation to a small region of  
26 chromosome II; and of 43 genes within this interval, only one gene, F32A11.3, had been  
27 previously identified in large-scale microarray studies as exhibiting a “spermatogenesis-  
28 enriched” expression pattern (Reinke et al., 2000; Reinke et al., 2004). To determine  
29 whether the F32A11.3 gene in *spe-18* mutants contained a molecular lesion, we  
30 amplified and sequenced the F32A11.3 gene from wildtype and *spe-18* (*hc133*) worms



1 and found that *hc133* contains a C/T point mutation in the last exon that changes the  
2 glutamine (Q301) CAA codon to the premature stop codon TAA (Fig. 3A).

3

4 To verify that F32A11.3 encoded *spe-18*, we used RNAi feeding to deplete F32A11.3 in  
5 *him-8* hermaphrodites and their male progeny. F32A11.3 depleted males exhibited  
6 spermatocyte defects that were visually indistinguishable from those of *spe-18(hc133)*  
7 males (Fig. 2E). Together, these results confirmed the molecular identity of *spe-18*.

8 Furthermore, since RNAi knockdowns invariably represent loss-of-function phenotypes,  
9 the RNAi phenotype suggests that the truncation of SPE-18 in *spe-18(hc133)* mutants  
10 represents a loss-of-function, rather than a neomorphic phenotype.

11

12 *spe-18* encodes a 353 amino acid protein (Fig 3A) that lacks any known functional  
13 domains. BLASTP analysis identified highly conserved homologs of F32A11.3 within  
14 multiple members of the *Caenorhabditis* genus (Fig. 3A). A BLASTP search to  
15 nematodes outside of the *Caenorhabditis* genus revealed homologs in species from the  
16 larger *Rhabditida* order as well as the order *Strongylida* (Fig. 3B, S1). Alignments to  
17 these less conserved homologs revealed two extended regions of high sequence  
18 conservation, one central and near the C-terminus, as well as shorter regions of  
19 conservation throughout (Fig. 3B, S1).

20

21 Multiple lines of evidence from amino acid composition, bioinformatics, and  
22 biochemistry suggest that SPE-18 is largely unstructured. The amino acid composition  
23 itself reveals that SPE-18 is an acidic protein with an isoelectric point of 4.78. The  
24 protein is rich in the disorder-promoting residues proline (P), glutamine (Q), glutamic  
25 acid (E), and serine (S), but it also has abundant alanines (A) and valines (V) (Fig. 3A).  
26 Bioinformatic studies show that SPE-18 lacks transmembrane domains, and two distinct  
27 disorder predicting programs suggest that SPE-18 has large intrinsically disordered  
28 regions. Phyre2 (Kelley et al., 2015) predicts that it is 70% unstructured (Fig. 3A).  
29 PrDOS (Ishida and Kinoshita, 2007) predicts that SPE-18 contains 25 to 50%  
30 unstructured residues depending on the false positive setting; these amino acids were  
31 largely a subset of those identified by Phyre2. In addition, the most likely model

1 predicted by structure modeling program iTasser (Roy et al., 2010) suggests that SPE-  
2 18 possesses minimal secondary structure (Fig. 3A, C). In this context, it is notable that  
3 both iTasser model 2 and PSSpred (Yan et al., 2013) predict that the conserved C-  
4 terminal domain contains a ten amino acid alpha helix (Fig. 3A,C). Furthermore, when  
5 this C-terminal region is deleted in *hc133* mutants; the truncated protein is destabilized.  
6 Finally, one key biochemical property of intrinsically unstructured proteins is that they  
7 are heat stable (Uversky, 2017). To test the inherent heat-stability of SPE-18, we  
8 expressed recombinant SPE-18 in *E. coli* and then assayed whether SPE-18 within the  
9 resulting lysate remained in the supernatant after a ten minute heat treatment at 95°C.  
10 Under these conditions, most proteins within the lysate precipitated whereas SPE-18  
11 remained in the supernatant (Fig. S2). Collectively, these data predict that SPE-18  
12 functions as an intrinsically disordered protein.

13

14 As the function of intrinsically unstructured proteins is often regulated by post-  
15 translational modifications, we also employed to bioinformatic approaches to assess  
16 potential phosphorylation sites. NetPhos3.1 predicted several high confidence  
17 phosphorylation sites in SPE-18 that are also conserved in its *Caenorhabditis* homologs  
18 (Fig. 3A) and two (S6 and Y169) that are conserved in more distant species (Fig. S1).

19

20 Taken together, these data predict that SPE-18 functions as a protein with large  
21 intrinsically disordered regions. However the sequence alignments also indicate that  
22 SPE-18 contains both extended and shorter conserved regions that could potentially  
23 serve as sites either for molecular interactions or for regulation by post-translational  
24 modifiers.

25

## 26 SPE-18 Protein Localizes in a Stage-Specific Pattern to FBs of Developing 27 Spermatocytes

28

29 To understand how SPE-18, as an unstructured protein, was promoting the assembly of  
30 MSP into fibrous bodies (FBs), we next sought to determine the cellular distribution of  
31 SPE-18. Does SPE-18 direct localized MSP assembly as a resident protein of either the

1 FB or MOs, or does SPE-18 direct FB assembly from some other cellular compartment?  
2 Is SPE-18 only present in spermatocytes or might it also be present in haploid sperm  
3 such that it could regulate MSP function at multiple stages of spermatogenesis?  
4

5 To address these questions, we first generated polyclonal antisera to a region of SPE-  
6 18 that was predicted to be both antigenic and specific (Fig. 3A). Since the antigenic  
7 sequence is before the *hc133* truncation, the antibody was predicted to recognize both  
8 the full-length and truncated protein. Western blots were used to test the specificity of  
9 the anti-SPE-18 antibody (Fig. 4A). Anti-SPE-18 antibody bound to a 42 kDa protein in  
10 lysates of wildtype adult males but not in *spe-18 (hc133)* males or males lacking an  
11 essential transcription factor for *spe-18*, *spe-44(ok1400)* (Kulkarni et al, 2012; Fig. 4A).  
12 This result not only confirmed the specificity of the antibody but also revealed that the  
13 *hc133* allele is functionally null as no truncated protein could be detected.  
14

15 On the same western blot, we tested hermaphrodite samples from specific larval stages  
16 (Fig 4A) and found that the major band detected in adult males could only be detected  
17 in fourth stage larvae (L4), the only stage when hermaphrodites are actively producing  
18 sperm. The notable absence of SPE-18 in adult hermaphrodites that have spermatozoa  
19 in their spermathecas, suggested that SPE-18 might function in developing and/or  
20 meiotically dividing spermatocytes but not in haploid sperm.  
21

22 We next determined the subcellular localization of SPE-18 by co-labelling isolated  
23 wildtype and mutant male gonads with DAPI and anti-SPE-18 antibody. Within wildtype  
24 male gonads, SPE-18 labelling was first detectable in late pachytene spermatocytes  
25 and then increased in intensity through the end of the karyosome stage (Fig. 4B).  
26 Consistent with the western blots, no signal was detectable within either *spe-18(hc133)*  
27 (Fig. 4C, Fig. S3C,D) or *spe-44* (Fig. S3E,F) gonads, confirming the specificity of the  
28 antibody for immunocytology. Within developing spermatocytes, SPE-18 labelled  
29 numerous discrete structures whose pattern and distribution seemed similar to fibrous  
30 bodies (FBs) (Fig. 4B). SPE-18 labelling then decreased in intensity through the meiotic  
31 divisions and became undetectable in haploid spermatids. This failure to detect SPE-18

1 in haploid sperm was consistent with the absence of a SPE-18 signal in western blots of  
2 adult spermatozoa-containing hermaphrodites. Importantly, since the one key defect in  
3 *spe-18(hc133)* spermatocytes is the inability to assemble MSP into FBs, clear evidence  
4 of SPE-18 localizing to FBs might suggest a direct role for SPE-18 in FB assembly.  
5

6 Because FBs develop in close association with the Golgi-derived MOs (Fig. 1B), it can  
7 be challenging to distinguish between the two compartments. To confirm that SPE-18 is  
8 not an MO component, we compared the localization patterns of SPE-18 to the MO  
9 marker 1CB4 (Okamoto and Thompson, 1985), a monoclonal antibody which labels  
10 multiple MO glycoproteins (Fig. 4D). Within developing pachytene and karyosome stage  
11 spermatocytes (Fig. 1), the first detectable SPE-18 structures were adjacent or within  
12 the 1CB4 labelled membranes, consistent with the known ultrastructure of FB-MO  
13 complexes (Roberts et al., 1986). By anaphase, the SPE-18 labelled FBs were larger  
14 than the confines of the MO (Fig. 1B and 4D). In haploid spermatids with MOs docked  
15 at the plasma membrane, SPE-18 was undetectable. These results show that SPE-18 is  
16 present in spermatocytes but not haploid sperm, and that within developing  
17 spermatocytes it associates with MOs during the earliest stages of FB development.  
18 Furthermore, the manner in which the MO and SPE-18 patterns diverge as  
19 spermatocytes mature suggests that SPE-18 is an early component of the FB rather  
20 than of the MO.  
21

22 If SPE-18 contributes to the localization and/or nucleation of FB assembly, then SPE-18  
23 should localize to developing FBs before MSP. To test this prediction, we compared the  
24 localization patterns of SPE-18 and MSP (Fig. 4E) and discovered previously  
25 undescribed details of FB growth and morphogenesis. In late pachytene spermatocytes  
26 when SPE-18 became detectable in distinct, spherical “pre-FB” structures, MSP was  
27 already present but diffuse throughout the cytoplasm. By diplotene when spermatocytes  
28 are transitioning from pachytene to the karyosome stage, MSP co-localized in spherical  
29 structures with SPE-18. Through the karyosome stage, the SPE-18 and MSP patterns  
30 diverged such that SPE-18 became differentially enriched at multiple points (typically  
31 four) around the edges of each FB. One the spermatocytes were meiotically dividing,

1 their spindle-shaped FBs grew primarily through elongation, with most of the growth  
2 seemingly restricted to the two ends. In these elongating FBs, SPE-18 localized in a  
3 barbell-like pattern with weak but persistent labelling of a central stripe and high  
4 concentrations of SPE-18 at the two ends. FBs reached their maximal size by  
5 metaphase II. During the budding division that follows anaphase II, SPE-18 segregated  
6 to the spermatids and away from the central residual body. SPE-18 labelling was  
7 undetectable in all but the most recently individualized spermatids. In contrast, MSP  
8 remained uniformly distributed throughout the FBs until later in the spermatid maturation  
9 process when the FBs disassembled, and MSP dispersed throughout the cytoplasm.  
10 The final disappearance of SPE-18 correlated with FB disassembly. Conversely the  
11 early localization of SPE-18 to pre-FB structures and its subsequent enrichment in  
12 regions of FB growth are consistent with SPE-18 functioning to nucleate MSP  
13 polymerization and/or promote the growth and bundling of MSP filaments.

14  
15 During the process of spermatogenesis, cellular components that are no longer needed  
16 are typically discarded into the residual body during the post-meiotic budding division  
17 (Fig. 1F). Thus we were surprised by the distinct and unusual pattern of SPE-18  
18 partitioning to the spermatids and then becoming undetectable shortly thereafter (Fig.  
19 4B,E). To rule out the possibility that this unusual pattern of SPE-18 loss was an artifact  
20 of antigen accessibility, we assessed the relative levels of MSP and SPE-18 by  
21 immunocytology and western blots in aging celibate males (Fig. S4). The western blot of  
22 sibling males supported our immunocytology results; as males accumulated spermatids,  
23 their MSP levels increased while their SPE-18 levels decreased in proportion to the  
24 shrinking numbers of late stage spermatocytes. This result confirmed that SPE-18 is  
25 indeed lost in newly individualized spermatids.

26  
27 In the absence of the kinase SPE-6, SPE-18 still forms nascent pre-FB structures

28  
29 Since both SPE-18 and the kinase SPE-6 are required for MSP to assemble into FBs,  
30 we investigated whether and how SPE-18 localization patterns might be altered in the  
31 null mutant *spe-6(hc49)* (Muhlrad and Ward, 2002). In *spe-6* spermatocytes, MSP

1 remained uniformly distributed throughout the cytoplasm while SPE-18 localized to  
2 discrete “pre-FB” structures (Fig. 5). Similar SPE-18 positive / MSP negative structures  
3 are present early, in the pachytene-stage spermatocytes of wildtype males (Fig. 4C).  
4 However in *spe-6* spermatocytes, we could only detect these structures in later  
5 karyosome stage spermatocytes (Fig. 5B). As *spe-6* spermatocytes progressed toward  
6 their terminal pro-metaphase arrest state (Varkey et al., 1993) these SPE-18 structures  
7 grew in size but remained as single spherical masses; they did not appreciatively  
8 extend or restructure into the multi-point or end-dominated structures observed in  
9 wildtype spermatocytes (Fig. 5C,D). These results suggest that the ability of SPE-18 to  
10 assemble into pre-FBs structures occurs independently of SPE-6. However SPE-6 is  
11 subsequently required either directly or indirectly for MSP and possibly other FB  
12 components to add to these pre-FBs. In the absence of normal FB assembly and  
13 elongation, SPE-18 fails to reorganize from its initial spherical structures.

14

#### 15 SPE-18 loss is not sufficient for the disassembly of mature FBs

16

17 The discovery that SPE-18 concentrates on the ends of mature FBs and that the  
18 subsequent loss of SPE-18 correlates with FB disassembly suggested that SPE-18  
19 might not only promote nascent FB assembly within developing spermatocytes but  
20 SPE-18 might also serve a later capping and/or stabilizing function in mature FBs.  
21 However if SPE-18 does play an essential role in stabilizing the ends of mature FBs  
22 then we would expect SPE-18 to persist in spermatids in which FB disassembly is  
23 blocked or delayed. To test this hypothesis, we investigated SPE-18 in two contexts.  
24 First, we tested if SPE-18 persisted in mutant spermatids that lacked the sperm-specific  
25 P1 phosphatases GSP-3 and GSP-4, as these mutant spermatids maintain much of  
26 their MSP in FBs (Wu et al., 2012). However examination of *gsp-3/4* spermatids  
27 revealed that SPE-18 loss occurred on schedule, shortly after spermatids detached  
28 from residual bodies (Fig. 6A). Next, we examined the spermatids of restrictively grown  
29 *fem-3(gf)* hermaphrodites which have a female soma but produce only sperm (Barton et  
30 al., 1987) since FB disassembly is known to be delayed in these spermatids (Wu et al.,  
31 2012). However, in *fem-3(gf)* spermatids, we also found that the timing of SPE-18 loss

1 was unaltered (Fig. 6B). Although our results do not address whether the loss of SPE-  
2 18 is necessary for FB disassembly, they do indicate that loss of SPE-18 from the ends  
3 is not sufficient for disassembly. Instead our results remain consistent with models in  
4 which the phosphatases GSP-3/4 promote MSP disassembly (Wu et al, 2012).

5  
6 SPE-18 is stabilized when spermatocytes fail to divide or FBs mis-segregate to the  
7 residual body

8  
9 The rapid disappearance of SPE-18 following sperm individualization raised the  
10 question of what regulates the stability of SPE-18. The loss of SPE-18 coincides with  
11 several different cellular transitions that could plausibly regulate its degradation. Key  
12 among these are 1) the completion meiotic chromosome segregation, 2) the physical  
13 separation of the FB from its associated MO, or 3) a physiological difference between  
14 spermatocytes and haploid spermatids. In an attempt to rule out some of these  
15 possibilities, we first examined SPE-18 patterns in *spe-4* mutants. *spe-4* encodes a  
16 presenilin-related, MO transmembrane protein, and mutant spermatocytes complete the  
17 meiotic chromosome segregation but fail to complete the budding division (L'Hernault  
18 and Arduengo, 1992; Arduengo et al., 1998). In terminally arrested *spe-4*  
19 spermatocytes, SPE-18 persisted at elevated levels (Fig. 6C), ruling out a potential  
20 linkage to the completion of meiotic chromosome segregation. We next examined  
21 mutants in *spe-10*, a palmitoyl transferase and is required for proper partitioning of FB-  
22 MOs into spermatids (Shakes and Ward, 1989; Gleason et al., 2006). In *spe-10(hc104)*  
23 spermatocytes, FBs separate from their MOs prior to spermatid-residual body  
24 separation, and a subset of MO-separated FBs either mis-segregate to the residual  
25 bodies or form cytoplasts as they bud from the residual bodies (Fig. 6D). Analysis of  
26 *spe-10* residual bodies containing FBs revealed that most of these FBs (40/50) labelled  
27 with both MSP and SPE-18 antibodies (large yellow arrowhead). For FBs that had  
28 budded from the mutant residual bodies as independent cytoplasts, only some labelled  
29 with SPE-10 (small yellow arrowheads). SPE-18 was undetectable in *spe-10* spermatids  
30 (cyan arrow). Thus, analysis of *spe-10* mutants ruled out a potential linkage to the  
31 separation of FB from MOs. Instead this analysis of *spe-4* and *spe-10* spermatocytes

1 favors models in which the loss of SPE-18 is coupled to some property of the  
2 individualized spermatids that is distinct from either undivided spermatocytes or residual  
3 bodies.

#### 4 **DISCUSSION**

5 For cells to function properly, polymerization of their cytoskeletal elements must be  
6 precisely controlled in both time and space. For many cells, localized polymerization is  
7 essential to initiate new cell functions. For nematode spermatocytes, localized MSP  
8 polymerization was hypothesized to both package MSP for post-meiotic partitioning and  
9 sequester it from interfering the meiotic divisions. In the present study, we show that the  
10 spermatogenesis specific protein SPE-18 promotes the localized assembly of the  
11 nematode major sperm protein MSP into tightly packed structures known as fibrous  
12 bodies (FBs). *spe-18* mutants exhibit sperm-specific sterility, and their spermatocytes  
13 are unable to assemble MSP into FBs. Consistent with SPE-18 functioning as a  
14 nucleating/assembly factor, SPE-18 is present in the right place at the right time. In  
15 wildtype spermatocytes, SPE-18 forms a single spherical “pre-FB” in association with  
16 each Golgi-derived membranous organelle (MOs), and these “pre-FBs” form before  
17 MSP co-localizes to these structures. SPE-18’s localization is independent of the kinase  
18 SPE-6, but SPE-6 is required for MSP to join the pre-FBs. *spe-18* mutant  
19 spermatocytes exhibit additional defects in both meiotic chromosome segregation and  
20 cytokinesis that are partially cold-sensitive. However, the SPE-18 localization patterns  
21 suggest that these defects are likely a secondary consequence of failing to sequester  
22 MSP within spermatocytes. We presume that unassembled FB components either  
23 physically interfere with these processes and/or induce the spindle-assembly  
24 checkpoint.

25 This analysis of SPE-18 localization patterns suggests a new model of FB assembly  
26 (Fig. 7): 1) SPE-18 assembles at each MO to form a spherical pre-FB that functions as  
27 a general gathering site for MSP filaments, 2) In a process that requires the kinase  
28 SPE-6, MSP is secondarily recruited to these pre-FBs. 3) As MSP levels rise and MSP  
29 concentrates at these sites, MSP polymerizes, and the resulting polymers bundle into



1 FBs, 4) As FBs continue to develop, SPE-18 shifts to a multi-point pattern that promotes  
2 ongoing FB elongation at the two ends and expansion in the middle. This distribution  
3 correlates with the formation of spindle-shaped FBs. 5) As SPE-18 increasingly  
4 concentrates at the two ends, the FBs elongate without expanding substantially in width.  
5 In this model, SPE-18 both nucleates localized MSP assembly and subsequently  
6 shapes the growing FBs by localizing the regions of expansion.

7 Prior to this study, the only known component of FBs was MSP itself. The discovery that  
8 the SPE-18 localization patterns change as the FBs develop reveals previously  
9 unappreciated complexities in FB composition, growth and shaping. Thus, this study  
10 raises new questions regarding both FB composition and control of MSP  
11 polymerization. We predict that SPE-18 interacts with multiple binding partners,  
12 including diverse FB components and factors that recruit and/or anchor SPE-18 to the  
13 MOs While MSP polymerizes differently during FB growth and pseudopod treadmilling,  
14 it remains unclear whether this involves distinct or overlapping co-regulators. Although  
15 SPE-18 itself is specific to FBs, other components could conceivably function in both  
16 contexts. Some of the proteins known to regulate MSP polymerization in the  
17 pseudopods of *Ascaris* sperm (Roberts and Stewart, 2012), may also mediate FB  
18 assembly. Candidate interactors are also likely to exist amongst the genes regulated by  
19 SPE-44, the transcriptional factor that regulates *spe-18* expression (Kulkarni et al.,  
20 2012) or NHR-23, a transcription factor that regulates additional genes required for FB  
21 assembly (Ragle et al., 2020).

22

23 SPE-18 functions in spermatocytes but is subsequently lost. Rather than being  
24 discarded in the residual body, SPE-18 is degraded shortly after differentially  
25 partitioning to the sperm. How SPE-18 is lost remains unclear. We found that SPE-18  
26 can be stabilized if it mis-segregates to residual bodies or is trapped within arrested  
27 spermatocytes (Fig. 6), so perhaps a SPE-18 stabilizing factor is differentially  
28 partitioned to the residual body and away from the sperm. SPE-18, like other  
29 intrinsically disordered proteins, could become proteolytically sensitive when released  
30 from its binding partners (Uversky, 2017; Flock et al, 2014). Post-translational or pH

1 changes could trigger SPE-18 to disassociate from its binding partners, assume a fully  
2 unstructured state, and be subjected to proteolytic degradation. In fact, the SPE-18  
3 sequence includes several potential phosphorylation sites (Fig. 3), and *Ascaris*  
4 spermatocytes maintain a higher pH (6.8) than spermatids (6.2) (King et al. 1992; King  
5 et al., 1994). SPE-18 does contain a single predicted, high-confidence ubiquitination site  
6 K160 (Fig. 3A). However, proteasomes can also degrade intrinsically disordered  
7 proteins in the absence of poly-ubiquitination (Asher et al., 2006). A distinct question is  
8 why SPE-18 is rapidly degraded following sperm individualization. Perhaps SPE-18  
9 degradation is essential both for FB disassembly and subsequent sperm function.  
10 Importantly, SPE-18 loss is insufficient for FB disassembly; as FB disassembly requires  
11 the phosphatase GSP-3/4 (Fig. 7; Wu et al, 2012).

12

13 The SPE-18 sequence provides important clues regarding how SPE-18 could be  
14 promoting FB assembly. SPE-18 is predicted to contain extended intrinsically  
15 disordered regions, particularly in the first half of the protein (Fig. 3). SPE-18 also  
16 contains two extended highly conserved regions that are not predicted to be disordered  
17 (Fig. 3) along with multiple, smaller conserved regions (Fig. S1). These could serve as  
18 either binding motifs or sites for post-translational modifications. While the intrinsically  
19 disordered regions of SPE-18 are undoubtedly critical for its function, they are not  
20 sufficient. In the absence of the mostly structured C-terminus, the truncated *hc133*  
21 version of SPE-18 is both non-functional and unstable. Proteins with a mix of extended  
22 disordered and small structured regions often scaffold the assembly of molecular  
23 complexes. Their inherent flexibility paired with multiple high specificity, low affinity  
24 binding sites enables them to bind to multiple proteins and exist in multiple distinct  
25 conformations (Pancsa and Fuxreiter, 2012). In addition, their ability to rapidly transition  
26 between extended and compact conformations enable some to employ a “fly-casting”  
27 mechanism to concentrate binding partners. Examples of such proteins include both the  
28 actin-modulator Wiskott-Aldrich syndrome protein (WASP) that links cell signaling to  
29 localized actin assembly and the phosphatase Calcineurin whose structure facilitates its  
30 multi-faceted regulation (Kim et al., 2000; Creamer, 2013). In some cases, the  
31 disordered regions of the protein become ordered upon binding to structured proteins

1 (Dyson and Wright, 2002). In others, the disordered regions remain “fuzzy” and never  
2 full fold (Sharma et al., 2015).

3

4 While the flexibility of proteins with large intrinsically disordered regions can function as  
5 singlets to interact with multiple, non-self, binding partners, this class of proteins can  
6 also gather together in large assemblages through liquid phase condensation (Shin and  
7 Brangwynne, 2017). Within such assemblages, intrinsically disordered proteins may  
8 themselves transition from a liquid to solid/amyloid state as they concentrate over time.  
9 In other cases, the intrinsically disordered proteins form a liquid droplet within which  
10 other proteins, including highly structured proteins, concentrate and polymerize.  
11 Examples of this supportive role include the spatial coordination of microtubule  
12 nucleation by BuGZ (Jiang et al., 2015), Tau (Hernandez-Vega et al., 2017), PLK4  
13 (Montenegro et al., 2018) and TPX2 (King and Petry, 2020). Notably, the patterns of  
14 these protein condensates in association with polymerizing microtubules resembles the  
15 patterns we observed of SPE-18 interacting with MSP fibers (Fig. 4E; Fig. 7). In a  
16 further parallel, when actin filaments bundle in association with the long flexible cross-  
17 linker filamin, the form of the resulting actin superstructures (spheres, spindles, or  
18 elongated rods) can be predictably modulated by the filamin-actin ratios (Weirich et al.,  
19 2017). Convincing evidence that SPE-18 promotes localized MSP assembly through the  
20 process of phase separation awaits both *in vitro* studies and an expanded parts list of  
21 FB components. However these intriguing similarities raise the exciting possibility that  
22 MSP will join actin and tubulin in the list of cytoskeletal proteins that employ liquid phase  
23 condensation to support their localized assembly.

24 Together these studies have given us new insights into the process and regulation of  
25 FB assembly. They place SPE-18 in the context of other known MSP regulators and  
26 reveal SPE-18 as an assembly factor for the localized formation and shaping of FBs.  
27 Just as studies of MSP assembly/disassembly within the pseudopods of crawling  
28 spermatozoa have both challenged and deepened our understanding of actin-based cell  
29 motility (Roberts and Stewart, 2000), studies of FB assembly/disassembly dynamics  
30 promise to provide an equally informative parallel to our understanding of bundled

1 cytoskeletal structures and their localized assembly. In particular, a deeper  
2 understanding of FB dynamics is likely to reveal novel insights into the construction of  
3 cytoskeletal assemblages that are facilitated by proteins with large intrinsically  
4 disordered regions.

## 5 **MATERIALS AND METHODS**

6

### 7 Strains and Culture

8 *C. elegans* were cultured on MYOB plates (Church et al., 1995) inoculated with *E. coli*  
9 strain OP50, using methods similar to those described by Brenner (1974).

10

11 Unless otherwise indicated, the following strains were provided by the CGC, which is  
12 funded by NIH Office of Research Infrastructure Programs (P40 OD010440):

13

14 N2 (Bristol)

15 CB4856 (Hawaiian)

16 CB1489 *him-8(e1489)* IV

17 BA606 *spe-6(hc49) unc-25(e156)* III; *eDp6*

18 BA782 *spe-10(hc104) him-5(e1490)* V

19 DR103 *dpy-10(e128) unc-4(e120)* II

20 JK816 *fem-3(q20gf)* IV

21 SL48 *dpy-5(e61) spe-4(q347)/sDf5 I*

22 VT132 *sqt-1(sc13) lin-29(n833) / mnC1 [dpy-10(e128) unc-52(e444)]* II

23

24 SL262 *unc-4(e120) spe-18(hc133) / mnC1 [dpy-10(e128) unc-52(e444)]* II was  
25 originally isolated in an ethyl methanesulfonate mutagenesis screen for SPE  
26 mutants by D. Shakes and S. L'Hernault

27 DS175 *unc-4(e120) spe-18(hc133)/mnC1 [dpy-10(e128) unc-52(e444)]* II; *him-*  
28 *8(e1489)* IV was constructed in the Shakes' lab

29 DS176 *rol-1(e91) spe-18(hc133) / mnC1 [dpy-10(e128) unc-52(e444)]* II; *him-*  
30 *8(e1489)* IV was constructed in the Shakes' lab

1  
2 RV120 *spe-44(ok1400) dpy-20(e1282)/ let-92(s677) unc-22(s7)* IV was a gift from  
3 Harold Smith  
4 XC26 *gsp-3(tm1647) gsp-4 (y418)/hT2[bli-4(e937)let-?(q782)qls48]* I; *him-*  
5 *8(e1489)* IV was a gift from Diana Chu.  
6

### 7 Fertility analysis

8 The number of self-progeny for *unc-4*; *him-8* (wildtype controls) and *spe-18 unc-4*; *him-*  
9 *8* mutants was determined by placing single worms on separate culture plates and  
10 transferring them to fresh plates daily to assess the entire brood.  
11

### 12 Molecular biology, identification, and analysis of the *spe-18* gene

13 The position of the *spe-18* gene was determined using standard linkage mapping  
14 (Sulston and Hodgkin, 1988) and single nucleotide polymorphism (SNP) – mapping  
15 (Swan et al, 2002) (see Table S1 in supplementary material). *hc133* was mapped to  
16 linkage group II and to the right of *rol-1*. Single nucleotide polymorphisms that  
17 generated restriction fragment length polymorphisms (SNIP-SNPs between N2 and  
18 Hawaiian (H) strains were used to further position on the physical map. N2/H hybrids  
19 were generated by crossing *rol-1(e91) spe-18(hc133)* homozygous hermaphrodites to  
20 wildtype Hawaiian males. Rol Non-Spe recombinant offspring from the hybrid worms  
21 were isolated and lines were established. Lysates from 18 individual lines and SNP  
22 analysis was carried out by PCR amplification using specific primers in the region of the  
23 SNP followed by restriction digestion using specific enzymes. Data from this analysis  
24 positioned *spe-18* to the right of *pkp2112* and close to *pkp2116* at approximately 13330  
25 kb. Of the spermatogenesis-enriched genes on linkage group II, F32A11.3 mapped  
26 closest to this region.  
27

28 To identify the molecular lesion in the *spe-18*, the F32A11.3 sequence on Wormbase  
29 was used to design primer sets to amplify 500 bp overlapping bidirectional sections.  
30 PCR based sequencing was used to sequence F32A11.3 from *hc133* mutant DNA in both  
31 directions.

1  
2 For the RNAi experiments, culture plates were soaked with IPTG solution overnight  
3 before adding concentrated *E. coli* containing the F32A11.3 feeding construct. Wildtype  
4 L4 hermaphrodites were plated on RNAi plates and allowed to lay embryos for 24  
5 hours. The F1 progeny were maintained on these plates and then L4 males were  
6 transferred to fresh RNAi plates for an additional 24-48 hours before analysis.

7  
8 Immunocytochemistry

9 To generate anti-SPE-18 antibodies, rabbits were initially pre-screened to identify those  
10 whose sera lacked cross-reactivity with *C. elegans* male germlines. Selected rabbits  
11 were injected with synthesized peptide corresponding to amino acids 266-279  
12 (YenZym). After a booster injection, serum was collected, and antibodies were affinity  
13 purified.

14  
15 Intact gonads were obtained by dissection of individual males in 5-10 microliters of  
16 sperm media (50 mM HEPES, 25 mM KCl, 1 mM MgSO<sub>4</sub>, 45 mM NaCl, and 5 mM  
17 CaCl<sub>2</sub>, pH 7.8) on ColorFrost Plus slides (Fisher Scientific) coated with poly-L-lysine  
18 (Sigma Aldrich). Samples were freeze-cracked in liquid nitrogen. Sperm spreads to  
19 analyze detached spermatocytes and spermatids were obtained by applying slight  
20 pressure to the coverslip before freeze-cracking. Samples were fixed overnight in -20°C  
21 methanol. Specimen preparation and antibody labeling followed established protocols  
22 (Shakes et al., 2009). Primary antibodies included: 1:1250 rabbit anti-SPE-18; 1:600  
23 4D5 mouse anti-MSP monoclonal (Kosinski et al., 2005), and 1:50 1CB4 monoclonal  
24 (Okamoto and Thomson, 1985). All samples were incubated with primary antibodies for  
25 2 hours at room temperature. Affinity-purified secondary antibodies included 1:100  
26 TRITC conjugated goat anti-rabbit IgG (Jackson ImmunoResearch Laboratories) and  
27 1:100 FITC or DyLight-conjugated goat-anti-mouse IgG (H+L) (Jackson  
28 ImmunoResearch Laboratories). In some experiments, appropriately diluted working  
29 solutions of the secondary antibodies were preabsorbed with a powder made from  
30 acetone-fixed *C. elegans* (Miller and Shakes, 1995).

31

1 Final slides were mounted with DAPI containing Fluoro Gel II mounting medium  
2 (Electron Microscopy Sciences). Images were acquired under differential interference  
3 contrast or epifluorescence using an Olympus BX60 microscope equipped with a  
4 QImaging EXi Aqua CCD camera. Photos were taken, merged, and exported for  
5 analysis using the program iVision. For multi-dimensional imaging, z-axis stacks were  
6 taken using a z-axis stage controller at 0.2 mm intervals. For deconvolution, images  
7 were run through MicroTome deconvolution software. In some cases, the levels adjust  
8 function in Adobe Photoshop was used to spread the data containing regions of the  
9 image across the full range of tonalities.

10

11 For DIC/Hoechst preparations, males were dissected in buffer with 100 µg/ml Hoechst  
12 33342 (Sigma Aldrich) on non-plus slides and immediately imaged.

13

#### 14 Western Blot

15 For western blot analysis, 100 worms were collected in 15-25 microliters of M9 buffer in  
16 the cap of a 1.5 microliter Eppendorf tube. Tubes were centrifuged for 1 minute at  
17 15,000 rcf, immediately frozen in liquid nitrogen and stored at -80°C. Worm lysates from  
18 one freeze-thaw cycle were homogenized with a 4:100 mix of β-mercaptoethanol (MP  
19 Biomedicals) and sample buffer (NuPAGE LDS 4X Sample Buffer, Invitrogen) heated to  
20 100°C, boiled for 5 minutes, and centrifuged for 8 minutes at 15,000 rcf. Lysates from  
21 50-100 worms were loaded per lane, and proteins were resolved at 150V via SDS-  
22 PAGE (NuPage Novex 4-12% Bis-Tris, Invitrogen), and transferred to a PDVF  
23 membrane (GE Healthcare). After blocking overnight with pH 8.0 Tris-buffered saline  
24 with 0.1% Tween20 containing either 4% non-fat dry milk (Carnation) or 5% bovine  
25 serum albumin (Sigma-Aldrich), membranes were incubated with the appropriate  
26 primary antibody diluted in blocking buffer (4% milk or 5% BSA in 1X TBST) for two  
27 hours at room temperature, followed by incubation with 1:20000 peroxidase-conjugated  
28 secondary antibody (Abcam) for two hours at room temperature, and then developed by  
29 enhanced chemiluminescence (Immobilon Western Chemiluminescent HRP substrate,  
30 Millipore). SPE-18 protein was detected by a 1:5000 dilution of rabbit anti-SPE-18  
31 polyclonal antibody (YenZym) and HRP conjugated goat-anti rabbit IgG (Abcam

1 #ab6721). MSP was detected by a 1:10000 dilution of mouse anti-MSP monoclonal  
2 antibody 4A5 (Kosinski et al., 2005) and HRP conjugated goat anti-mouse IgG  
3 (#ab6789).

## 4 5 **ACKNOWLEDGEMENTS**

6 Some strains were provided by the *Caenorhabditis* Genetics Center, which is funded by  
7 the NIH Office of Research Infrastructure Program [P40 OD010440]. We thank David  
8 Greenstein and Stephen L'Hernault for antibodies, and Harold Smith for the SPE-18  
9 expressing *E. coli* strain. Lidia Epp (W&M molecular core technician) and  
10 undergraduates Alana Noritake and Bryan Neva assisted with the genetic and  
11 molecular identification of SPE-18 as F32A11.3. We thank Jordan Ward, Penny Sadler,  
12 and Kayleigh Morrison for critical reading of this manuscript.

## 13 **COMPETING INTERESTS**

14 No competing interests declared.

## 15 16 **FUNDING**

17 This work was supported by the National Institutes of Health [R15GM-096309 to D.C.S.]  
18 and the McLeod Tyler Professorship to D.C.S.

## 19 20 **AUTHOR CONTRIBUTIONS**

21 Conceptualization: D.C.S.; Methodology: D.C.S, K.L.P., M.S.P, and C.M.U.; Validation:  
22 K.L.P., M.S.P, and C.M.U; Formal analysis: D.C.S, K.L.P., M.S.P, and C.M.U.;  
23 Investigation: K.L.P., M.S.P, and C.M.U.; Writing - original draft: M.S.P., K.L.P., D.C.S.;  
24 Writing - review & editing: K.L.P., M.S.P., D.C.S.; Visualization: K.L.P., D.C.S.;  
25 Supervision: D.C.S.; Project administration: D.C.S.; Funding acquisition: D.C.S.

## 26 27 **DATA AVAILABILITY**

28 Not applicable

29

30



1   **REFERENCES**

2

3   Arduengo PM, Appleberry OK, Chuang P, L'Hernault SW. The presenilin protein  
4   family member SPE-4 localizes to an ER/Golgi derived organelle and is required for  
5   proper cytoplasmic partitioning during *Caenorhabditis elegans* spermatogenesis. *J*  
6   *Cell Sci.* 1998;111 ( Pt 24):3645-3654.

7

8   Asher G, Reuven N, Shaul Y. 20S proteasomes and protein degradation "by  
9   default". *Bioessays.* 2006;28(8):844-849. doi:10.1002/bies.20447

10

11   Barton MK, Schedl TB, Kimble J. Gain-of-function mutations of fem-3, a sex-  
12   determination gene in *Caenorhabditis elegans*. *Genetics.* 1987;115(1):107-119.

13

14   Blom N, Gammeltoft S, Brunak S. Sequence and structure-based prediction of  
15   eukaryotic protein phosphorylation sites. *J Mol Biol.* 1999;294(5):1351-1362.

16   doi:10.1006/jmbi.1999.3310

17

18   Bodakuntla S, Jijumon AS, Villablanca C, Gonzalez-Billault C, Janke C. Microtubule-  
19   Associated Proteins: Structuring the Cytoskeleton. *Trends Cell Biol.* 2019;29(10):804-  
20   819. doi:10.1016/j.tcb.2019.07.004

21

22   Brenner S. The genetics of *Caenorhabditis elegans*. *Genetics* 1974;77:71–94.

23

24   Brouhard GJ, Rice LM. Microtubule dynamics: an interplay of biochemistry and  
25   mechanics. *Nat Rev Mol Cell Biol.* 2018;19(7):451-463. doi:10.1038/s41580-018-0009-y

26

27   Bullock TL, McCoy AJ, Kent HM, Roberts TM, Stewart M. Structural basis for  
28   amoeboid motility in nematode sperm. *Nat Struct Biol.* 1998;5(3):184-189.

29   doi:10.1038/nsb0398-184

30

- 1 Buracco S, Claydon S, Insall R. Control of actin dynamics during cell  
2 motility. *F1000Res*. 2019;8:F1000 Faculty Rev-1977. Published 2019 Nov 25.  
3 doi:10.12688/f1000research.18669.1  
4
- 5 Chu DS, Shakes DC. Spermatogenesis. *Adv Exp Med Biol*. 2013;757:171-203.  
6 doi:10.1007/978-1-4614-4015-4\_7  
7
- 8 Church DL, Guan KL, Lambie EJ. Three genes of the MAP kinase cascade, mek-2,  
9 mpk-1/sur-1 and let-60 ras, are required for meiotic cell cycle progression in  
10 *Caenorhabditis elegans*. *Development*. 1995;121(8):2525-2535.  
11
- 12 de Forges H, Bouissou A, Perez F. Interplay between microtubule dynamics and  
13 intracellular organization. *Int J Biochem Cell Biol*. 2012;44(2):266-274.  
14 doi:10.1016/j.biocel.2011.11.009  
15
- 16 Dyson HJ, Wright PE. Coupling of folding and binding for unstructured proteins. *Curr*  
17 *Opin Struct Biol*. 2002;12(1):54-60. doi:10.1016/s0959-440x(02)00289-0  
18
- 19 Flock T, Weatheritt RJ, Latysheva NS, Babu MM. Controlling entropy to tune the  
20 functions of intrinsically disordered regions. *Curr Opin Struct Biol*. 2014;26:62-72.  
21 doi:10.1016/j.sbi.2014.05.007  
22
- 23 Gleason EJ, Lindsey WC, Kroft TL, Singson AW, L'Hernault SW. spe-10 encodes a  
24 DHHC-CRD zinc-finger membrane protein required for endoplasmic reticulum/Golgi  
25 membrane morphogenesis during *Caenorhabditis elegans*  
26 spermatogenesis. *Genetics*. 2006;172(1):145-158. doi:10.1534/genetics.105.047340  
27
- 28 Goodson HV, Jonasson EM. Microtubules and Microtubule-Associated Proteins. *Cold*  
29 *Spring Harb Perspect Biol*. 2018;10(6):a022608. Published 2018 Jun 1.  
30 doi:10.1101/cshperspect.a022608  
31

- 1 Hernández-Vega A, Braun M, Scharrel L, et al. Local Nucleation of Microtubule  
2 Bundles through Tubulin Concentration into a Condensed Tau Phase. *Cell Rep.*  
3 2017;20(10):2304-2312. doi:10.1016/j.celrep.2017.08.042  
4
- 5 Hohmann T, Dehghani F. The Cytoskeleton-A Complex Interacting Meshwork. *Cells.*  
6 2019;8(4):362. Published 2019 Apr 18. doi:10.3390/cells8040362  
7
- 8 Hu J, Cheng S, Wang H, et al. Distinct roles of two myosins in *C. elegans* spermatid  
9 differentiation. *PLoS Biol.* 2019;17(4):e3000211. Published 2019 Apr 16.  
10 doi:10.1371/journal.pbio.3000211  
11
- 12 Ishida T, Kinoshita K. PrDOS: prediction of disordered protein regions from amino  
13 acid sequence. *Nucleic Acids Res.* 2007;35(Web Server issue):W460-W464.  
14 doi:10.1093/nar/gkm363  
15
- 16 Italiano JE Jr, Roberts TM, Stewart M, Fontana CA. Reconstitution in vitro of the  
17 motile apparatus from the amoeboid sperm of *Ascaris* shows that filament assembly  
18 and bundling move membranes. *Cell.* 1996;84(1):105-114. doi:10.1016/s0092-  
19 8674(00)80997-6  
20
- 21 Italiano JE Jr, Stewart M, Roberts TM. Localized depolymerization of the major sperm  
22 protein cytoskeleton correlates with the forward movement of the cell body in the  
23 amoeboid movement of nematode sperm. *J Cell Biol.* 1999;146(5):1087-1096.  
24 doi:10.1083/jcb.146.5.1087  
25
- 26 Jaramillo-Lambert A, Ellefson M, Villeneuve AM, Engebrecht J. Differential timing of S  
27 phases, X chromosome replication, and meiotic prophase in the *C. elegans* germ  
28 line. *Dev Biol.* 2007;308(1):206-221. doi:10.1016/j.ydbio.2007.05.019  
29

- 1 Jiang H, Wang S, Huang Y, et al. Phase transition of spindle-associated protein  
2 regulate spindle apparatus assembly. *Cell*. 2015;163(1):108-122.  
3 doi:10.1016/j.cell.2015.08.010  
4
- 5 Kelley, L., Mezulis, S., Yates, C. et al. The Phyre2 web portal for protein modeling,  
6 prediction and analysis. *Nat Protoc* **10**, 845–858 (2015).  
7 <https://doi.org/10.1038/nprot.2015.053>  
8
- 9 Kim AS, Kakalis LT, Abdul-Manan N, Liu GA, Rosen MK: Autoinhibition and activation  
10 mechanisms of the Wiskott–Aldrich syndrome protein. *Nature* 2000, 404:151-158.  
11
- 12 King MR, Petry S. Phase separation of TPX2 enhances and spatially coordinates  
13 microtubule nucleation. *Nat Commun*. 2020;11(1):270. Published 2020 Jan 14.  
14 doi:10.1038/s41467-019-14087-0  
15
- 16 King KL, Stewart M, Roberts TM, Seavy M. Structure and macromolecular assembly  
17 of two isoforms of the major sperm protein (MSP) from the amoeboid sperm of the  
18 nematode, *Ascaris suum*. *J Cell Sci*. 1992;101 ( Pt 4):847-857.  
19
- 20 King KL, Essig J, Roberts TM, Moerland TS. Regulation of the *Ascaris* major sperm  
21 protein (MSP) cytoskeleton by intracellular pH. *Cell Motil Cytoskeleton*.  
22 1994;27(3):193-205. doi:10.1002/cm.970270302  
23
- 24 King KL, Stewart M, Roberts TM. Supramolecular assemblies of the *Ascaris suum*  
25 major sperm protein (MSP) associated with amoeboid cell motility. *J Cell Sci*. 1994;107  
26 ( Pt 10):2941-2949.  
27
- 28 Klass MR, Hirsh D. Sperm isolation and biochemical analysis of the major sperm  
29 protein from *Caenorhabditis elegans*. *Dev Biol*. 1981;84(2):299-312. doi:10.1016/0012-  
30 1606(81)90398-5  
31

- 1 Kulkarni M, Shakes DC, Guevel K, Smith HE. SPE-44 implements sperm cell fate. *PLoS*  
2 *Genet.* 2012;8(4):e1002678. doi:10.1371/journal.pgen.1002678  
3
- 4 LeClaire LL 3rd, Stewart M, Roberts TM. A 48 kDa integral membrane phosphoprotein  
5 orchestrates the cytoskeletal dynamics that generate amoeboid cell motility in *Ascaris*  
6 sperm. *J Cell Sci.* 2003;116(Pt 13):2655-2663. doi:10.1242/jcs.00469  
7
- 8 L'Hernault SW, Shakes DC, Ward S. Developmental genetics of chromosome I  
9 spermatogenesis-defective mutants in the nematode *Caenorhabditis elegans*. *Genetics.*  
10 1988;120(2):435-452.  
11
- 12 L'Hernault SW, Arduengo PM. Mutation of a putative sperm membrane protein in  
13 *Caenorhabditis elegans* prevents sperm differentiation but not its associated meiotic  
14 divisions. *J Cell Biol.* 1992;119(1):55-68. doi:10.1083/jcb.119.1.55  
15
- 16 Madeira F, Park YM, Lee J, et al. The EMBL-EBI search and sequence analysis tools  
17 APIs in 2019. *Nucleic Acids Research.* 2019 Jul;47(W1):W636-W641. DOI:  
18 10.1093/nar/gkz268.  
19
- 20 Miller DM, Shakes DC. Immunofluorescence microscopy. *Methods Cell Biol.*  
21 1995;48:365-394.  
22
- 23 Montenegro Gouveia S, Zitouni S, Kong D, et al. PLK4 is a microtubule-associated  
24 protein that self-assembles promoting *de novo* MTOC formation. *J Cell Sci.*  
25 2018;132(4):jcs219501. Published 2018 Nov 9. doi:10.1242/jcs.219501  
26
- 27 Muhlrud PJ, Ward S. Spermiogenesis initiation in *Caenorhabditis elegans* involves a  
28 casein kinase 1 encoded by the *spe-6* gene. *Genetics.* 2002;161(1):143-155.  
29
- 30 Nelson G.A. , Roberts T.M. , Ward S. *Caenorhabditis elegans* spermatozoan  
31 locomotion: amoeboid movement with almost no actin. *J. Cell Biol.* (1982);92:121–131

1  
2 Nishimura H, L'Hernault SW. Spermatogenesis-defective (spe) mutants of the  
3 nematode *Caenorhabditis elegans* provide clues to solve the puzzle of male germline  
4 functions during reproduction. *Dev Dyn*. 2010;239(5):1502-1514.  
5 doi:10.1002/dvdy.22271  
6  
7 Okamoto H, Thomson JN. Monoclonal antibodies which distinguish certain classes of  
8 neuronal and supporting cells in the nervous tissue of the nematode *Caenorhabditis*  
9 *elegans*. *J Neurosci*. 1985;5(3):643-653. doi:10.1523/JNEUROSCI.05-03-00643.1985  
10  
11 Pancsa R, Fuxreiter M. Interactions via intrinsically disordered regions: what kind of  
12 motifs?. *IUBMB Life*. 2012;64(6):513-520. doi:10.1002/iub.1034  
13  
14 Radivojac P, Vacic V, Haynes C, et al. Identification, analysis, and prediction of protein  
15 ubiquitination sites. *Proteins*. 2010;78(2):365-380. doi:10.1002/prot.22555  
16  
17 Ragle JM, Aita AL, Morrison KN, Martinez-Mendez R, Saeger HN, Ashley  
18 GA, Johnson LC, Schubert KA, Shakes DC, Ward JD The conserved  
19 molting/circadian rhythm regulator NHR-23/NR1F1 serves as an essential co-regulator  
20 of *C. elegans* spermatogenesis.  
21 bioRxiv 2020.06.11.147298; doi: <https://doi.org/10.1101/2020.06.11.147298>  
22  
23 Reinke V, Smith HE, Nance J, et al. A global profile of germline gene expression in *C.*  
24 *elegans*. *Mol Cell*. 2000;6(3):605-616. doi:10.1016/s1097-2765(00)00059-9  
25  
26 Reinke V, Gil IS, Ward S, Kazmer K. Genome-wide germline-enriched and sex-biased  
27 expression profiles in *Caenorhabditis elegans*. *Development*. 2004;131(2):311-323.  
28 doi:10.1242/dev.00914  
29  
30 Roberts, T. M. (2005). Major sperm protein. *Current Biology*, 15(5), R153.  
31

- 1 Roberts TM, Pavalko FM, Ward S. Membrane and cytoplasmic proteins are  
2 transported in the same organelle complex during nematode spermatogenesis. *J Cell*  
3 *Biol.* 1986;102(5):1787-1796. doi:10.1083/jcb.102.5.1787  
4
- 5 Roberts TM, Stewart M. Role of major sperm protein (MSP) in the protrusion and  
6 retraction of *Ascaris* sperm. *Int Rev Cell Mol Biol.* 2012;297:265-293. doi:10.1016/B978-  
7 0-12-394308-8.00007-8  
8
- 9 Rottner K, Faix J, Bogdan S, Linder S, Kerkhoff E. Actin assembly mechanisms at a  
10 glance. *J Cell Sci.* 2017;130(20):3427-3435. doi:10.1242/jcs.206433  
11
- 12 Roy A, Kucukural A, Zhang Y. I-TASSER: a unified platform for automated protein  
13 structure and function prediction. *Nat Protoc.* 2010;5(4):725-738.  
14 doi:10.1038/nprot.2010.5  
15
- 16 Sepsenwol S, Ris H, Roberts TM. A unique cytoskeleton associated with crawling in  
17 the amoeboid sperm of the nematode, *Ascaris suum*. *J Cell Biol.* 1989;108(1):55-66.  
18 doi:10.1083/jcb.108.1.55  
19
- 20 Shakes DC, Wu JC, Sadler PL, et al. Spermatogenesis-specific features of the meiotic  
21 program in *Caenorhabditis elegans*. *PLoS Genet.* 2009;5(8):e1000611.  
22 doi:10.1371/journal.pgen.1000611  
23
- 24 Shakes DC, Ward S. Mutations that disrupt the morphogenesis and localization of a  
25 sperm-specific organelle in *Caenorhabditis elegans*. *Dev Biol.* 1989;134(2):307-316.  
26 doi:10.1016/0012-1606(89)90103-6  
27
- 28 Sharma R, Raduly Z, Miskei M, Fuxreiter M. Fuzzy complexes: Specific binding without  
29 complete folding. *FEBS Lett.* 2015;589(19 Pt A):2533-2542.  
30 doi:10.1016/j.febslet.2015.07.022  
31

- 1 Shin Y, Brangwynne CP. Liquid phase condensation in cell physiology and  
2 disease. *Science*. 2017;357(6357):eaaf4382. doi:10.1126/science.aaf4382  
3
- 4 Singson A. Every sperm is sacred: fertilization in *Caenorhabditis elegans*. *Dev Biol*.  
5 2001;230(2):101-109. doi:10.1006/dbio.2000.0118  
6
- 7 Smith HE. Nematode sperm motility. *WormBook*. 2014;1-15. Published 2014 Apr 4.  
8 doi:10.1895/wormbook.1.68.2.  
9
- 10 Sulston, J. and Hodgkin, J. Methods. In *The Nematode Caenorhabditis elegans* (ed. W.  
11 B. Wood), 1988. pp. 587-606. Cold Spring Harbor: Cold Spring Harbor Laboratory  
12 Press  
13
- 14 Svitkina TM. Ultrastructure of the actin cytoskeleton. *Curr Opin Cell Biol*. 2018;54:1-8.  
15 doi:10.1016/j.ceb.2018.02.007  
16
- 17 Swan KA, Curtis DE, McKusick KB, Voinov AV, Mapa FA, Cancilla MR. High-  
18 throughput gene mapping in *Caenorhabditis elegans*. *Genome Res*. 2002;12(7):1100-  
19 1105. doi:10.1101/gr.208902  
20
- 21 Uversky VN. Paradoxes and wonders of intrinsic disorder: Stability of  
22 instability. *Intrinsically Disord Proteins*. 2017;5(1):e1327757. Published 2017 Oct 16.  
23 doi:10.1080/21690707.2017.1327757  
24
- 25 Varkey JP, Jansma PL, Minniti AN, Ward S. The *Caenorhabditis elegans* spe-6 gene  
26 is required for major sperm protein assembly and shows second site non-  
27 complementation with an unlinked deficiency. *Genetics*. 1993;133(1):79-86.  
28
- 29 Ward, S. (1986) The asymmetric localization of gene products during the development  
30 of *Caenorhabditis elegans* spermatozoa. In *Gametogenesis and the Early Embryo*, J.  
31 Gall, ed. (New York: A.R. Liss), pp. 55–75.



1

2 Ward S, Argon Y, Nelson GA. Sperm morphogenesis in wild-type and fertilization-  
3 defective mutants of *Caenorhabditis elegans*. *J Cell Biol.* 1981;91(1):26-44.

4 doi:10.1083/jcb.91.1.26

5

6 Weirich KL, Banerjee S, Dasbiswas K, Witten TA, Vaikuntanathan S, Gardel ML.  
7 Liquid behavior of cross-linked actin bundles. *Proc Natl Acad Sci U S A.*

8 2017;114(9):2131-2136. doi:10.1073/pnas.1616133114

9

10 Winter ES, Schwarz A, Fabig G, et al. Cytoskeletal variations in an asymmetric cell  
11 division support diversity in nematode sperm size and sex ratios. *Development.*

12 2017;144(18):3253-3263. doi:10.1242/dev.153841

13 Wu JC, Go AC, Samson M, et al. Sperm development and motility are regulated by  
14 PP1 phosphatases in *Caenorhabditis elegans*. *Genetics.* 2012;190(1):143-157.

15 doi:10.1534/genetics.111.135376

16

17 Yan R, Xu D, Yang J, Walker S, Zhang Y. A comparative assessment and analysis of  
18 20 representative sequence alignment methods for protein structure prediction. *Sci*

19 *Rep.* 2013;3:2619. doi:10.1038/srep02619

20

21 Yi K, Wang X, Emmett MR, Marshall AG, Stewart M, Roberts TM. Dephosphorylation  
22 of major sperm protein (MSP) fiber protein 3 by protein phosphatase 2A during cell

23 body retraction in the MSP-based amoeboid motility of *Ascaris* sperm. *Mol Biol Cell.*

24 2009;20(14):3200-3208. doi:10.1091/mbc.e09-03-0240

25

26

## 27 **FIGURE LEGENDS**

28

29 Figure 1. Overview of *C. elegans* spermatogenesis. (A) Schematic of adult male gonad  
30 highlighting its linear organization. Undifferentiated germ cells proliferate mitotically at  
31 the distal end, then commit to spermatogenesis as they transition (T) to meiotic

1 prophase before entering an extended pachytene stage. Towards the end of meiotic  
2 prophase, the spermatocytes enter the karyosome stage (K) during which the  
3 chromosomes compact and global transcription ceases. Following a narrow zone of  
4 meiotically dividing spermatocytes (D), quiescent haploid spermatids (S) accumulate in  
5 the seminal vesicle. (B) Schematic of a Golgi-derived fibrous body-membranous  
6 organelle (FB-MO) complex showing the arms of the MO head region surrounding the  
7 MSP-enriched FB (green), the glycoprotein filled MO vesicle, and the electron dense  
8 collar that divides these two domains of the MO. (C-D) Isolated male gonad showing  
9 stage-specific chromatin morphology by DAPI (C) and co-labelled with anti-MSP (green)  
10 to show initial expression in pachytene spermatocytes (small arrow) and distinct FBs  
11 (large arrow) in karyosome stage spermatocytes (D). (E-F) Stage-specific patterns of  
12 MSP distribution in spermatocytes co-labelled with DAPI (blue) and anti-MSP (green) or  
13 in schematic drawings (F). During nematode spermatogenesis, anaphase II is following  
14 by a partitioning, budding figure stage during which the cell's actin, microtubules, and  
15 ribosomes are discarded in a central residual body while the FB-MO complexes,  
16 mitochondria, and chromatin partition to the spermatids. Once spermatids detach from  
17 the residual bodies, all but the most recently individualized (\*), contain MOs that have  
18 docked but do not fuse with the plasma membrane and the FBs disassemble so that  
19 MSP disperses throughout the cytoplasm. In motile spermatozoa, the MOs form stable  
20 fusion pores with the plasma membrane of the cell body, and MSP localizes to the  
21 pseudopod where its assembly/disassembly dynamics drive pseudopod motility. Scale  
22 bars = 5 microns.

23

24 Figure 2. *spe-18* spermatocytes are defective in FB assembly and progression through  
25 the meiotic divisions. (A) Wildtype and mutant late meiotic prophase (karyosome) stage  
26 spermatocytes co-labelled with DAPI (blue) and anti-MSP (green) and enlarged 1.5X.  
27 (B-E) DIC/Hoechst image of wildtype (B), *spe-18* at 16°C (C) and 25°C(D), and  
28 F32A11.3 (RNAi) (E) sperm spreads. Abbreviations: karyosome (K), metaphase I(MI);  
29 anaphase I(AI), and haploid spermatids (s). Asterisk marks arrested spermatocytes with  
30 3-4 compact chromosome masses. Scale bars = 5 microns.

31

1 Figure 3. The amino acid sequence of SPE-18 (F32A11.3) and its bioinformatic  
2 analysis. (A) Clustal Omega alignment (Madeira et al., 2019) of F32A11.3 with *C.*  
3 *briggsae* and *C. remanei*. Pre-mature stop codon in *hc133* (CAA/TAA) marked in red  
4 (Q301). Predicted disordered regions from Phyre2 in blue (Kelley et al., 2015). iTasser  
5 structural predictions from model 1 (magenta helices) or model 2 (red helices, green  
6 strands) (Roy et al., 2010). Potential phosphorylation sites that are both conserved and  
7 predicted with high confidence by NetPhos3.1 highlighted in yellow (Blom et al., 1999).  
8 High confidence predicted ubiquitination site from UbPred highlighted in orange  
9 (Radivojac et al., 2010). Boxed region (266-279) in the *C. elegans* sequence is the  
10 peptide used to generate an antibody. Boxed regions in the *C. remanei* sequence are  
11 conserved across multiple nematode species. (B) Regions of high conservation across  
12 multiple nematode species corresponding to the boxed regions in A. Species include  
13 *Caenorhabditis elegans* (CAEEL), *Caenorhabditis briggsae* (CAEBR), *Caenorhabditis*  
14 *remanei* (CAERE), *Angiostrongylus costaricensis* (ANGCS), *Nippostrongylus*  
15 *brasiliensis* (NIPBR), and *Ancylostoma ceylanicum* (ANCCE) from the order Rhabditida  
16 as well as *Haemonchus contortus* (HAECO), *Dictyocaulus viviparus* (DICVI), and  
17 *Oesophagostomum dentatum* (OESDE) from the order Strongylida. (C) Top two-scoring  
18 iTasser models of SPE-18 protein structure.

19  
20 Figure 4. SPE-18 localizes to developing FBs in a stage-specific pattern. (A) Western  
21 blot comparing SPE-18 levels in age-synchronized wildtype hermaphrodites, wildtype  
22 males, and mutant *spe-18* (S18) and *spe-44* (S44) males. A non-specific band at ~100  
23 kDa serves as a loading control. Arrow in shows the position of SPE-18 with strong  
24 bands in L4 hermaphrodites and males. (B,C) Immunocytology of isolated male gonads  
25 co-labelled with DAPI and anti-SPE-18 antibody in wildtype males (B) or *spe-18(hc133)*  
26 males (C). (D) Co-immunolabelling of wildtype spermatocytes with anti-SPE-18 and the  
27 MO marker 1CB4. Inserts are 3X enlarged for visibility and correspond to arrows in the  
28 larger figure. (E) SPE-18/MSP co-immunolabelling in individual, staged, wildtype  
29 spermatocytes and cartoon schematic. 2X enlarged. Abbreviations: Pachytene (P),  
30 Diplotene (Dp/Diplo), karyosome (K), meiotic division zone (Div), metaphase I/II (meta

1 I/II); budding figure (BF), anaphase I (AI), spermatids (sp). Scale bars = 5 microns (D)  
2 and 10 microns (B, C, E).

3

4 Figure 5. In *spe-6(hc49)* mutants, SPE-18 forms pre-FBs in the absence of polymerizing  
5 MSP. Immunolocalization of SPE-18 in wildtype (A) and *spe-6(hc49)* male gonads (B)  
6 co-labelled with DAPI and anti-SPE-18. (C,D) 2X enlarged images of arrow-indicated  
7 spermatocytes from gonad image above. Stages include pachytene (pachy), karyosome  
8 (kary) and either anaphase I (wildtype) or terminal prometaphase arrest (*hc49*). Scale  
9 bar = 20 microns.

10

11 Figure 6. SPE-18 is lost in newly individualized spermatids but stabilized in other  
12 cellular contexts. Zone of meiotically dividing spermatocytes, budding figures and  
13 spermatids in isolated gonads co-labelled with DAPI (blue), anti-SPE-18 (red), and  
14 either anti-MSP (green) (A,B) or the MO marker 1CB4 (green) (D,E). SPE-18 labelling is  
15 undetectable in the spermatids of *gsp-3/4* males (A) and *fem-3(gf)* (B) hermaphrodites  
16 despite the persistent MSP structures. (C) SPE-18 labelling of arrested *spe-4* budding  
17 figures (C, yellow arrow). (D) MO marker (1CB4) and SPE-18 labelling of *spe-10* sperm  
18 spreads showing FBs in mis-segregated to a residual body (large yellow arrowhead),  
19 released FBs (small yellow arrowheads), and spermatids (cyan arrow). Scale bar = 10  
20 microns.

21

22 Figure 7. Model of SPE-18 function in localized FB assembly

1 **Table 1: Analysis of Hermaphrodite Self-Sterility Phenotype**

2

| STRAIN               | Temp (C) | n  | Oocytes (SE) | Embryos (SE) | %Hatch | Progeny (SE) |
|----------------------|----------|----|--------------|--------------|--------|--------------|
| <i>unc-4; him-8</i>  | 16       | 8  | 18.3 +/-5.9  | 183.8+/-2.9  | 87%    | 160+/-2.6    |
|                      | 20       | 9  | 72.2+/-4.8   | 187.9+/-9.9  | 90%    | 170+/-9.8    |
|                      | 25       | 7  | 12.9+/-2.6   | 135.1+/-6.0  | 73%    | 99.6+/-3.3   |
| <i>spe-18 unc-4;</i> | 16       | 22 | 9.6+/-2.0    | 0            | n/a    | 0            |
| <i>him-8</i>         | 20       | 20 | 17.05+/- 1.4 | 0.7+/-0.2    | 100%   | 0.7+/-0.2    |
|                      | 25       | 17 | 47.6+/-4.3   | 2.4+/-0.5    | 100%   | 2.4+/-0.5    |

3

4

5

6 \*S.E. indicates standard error of the mean.

Figure 1

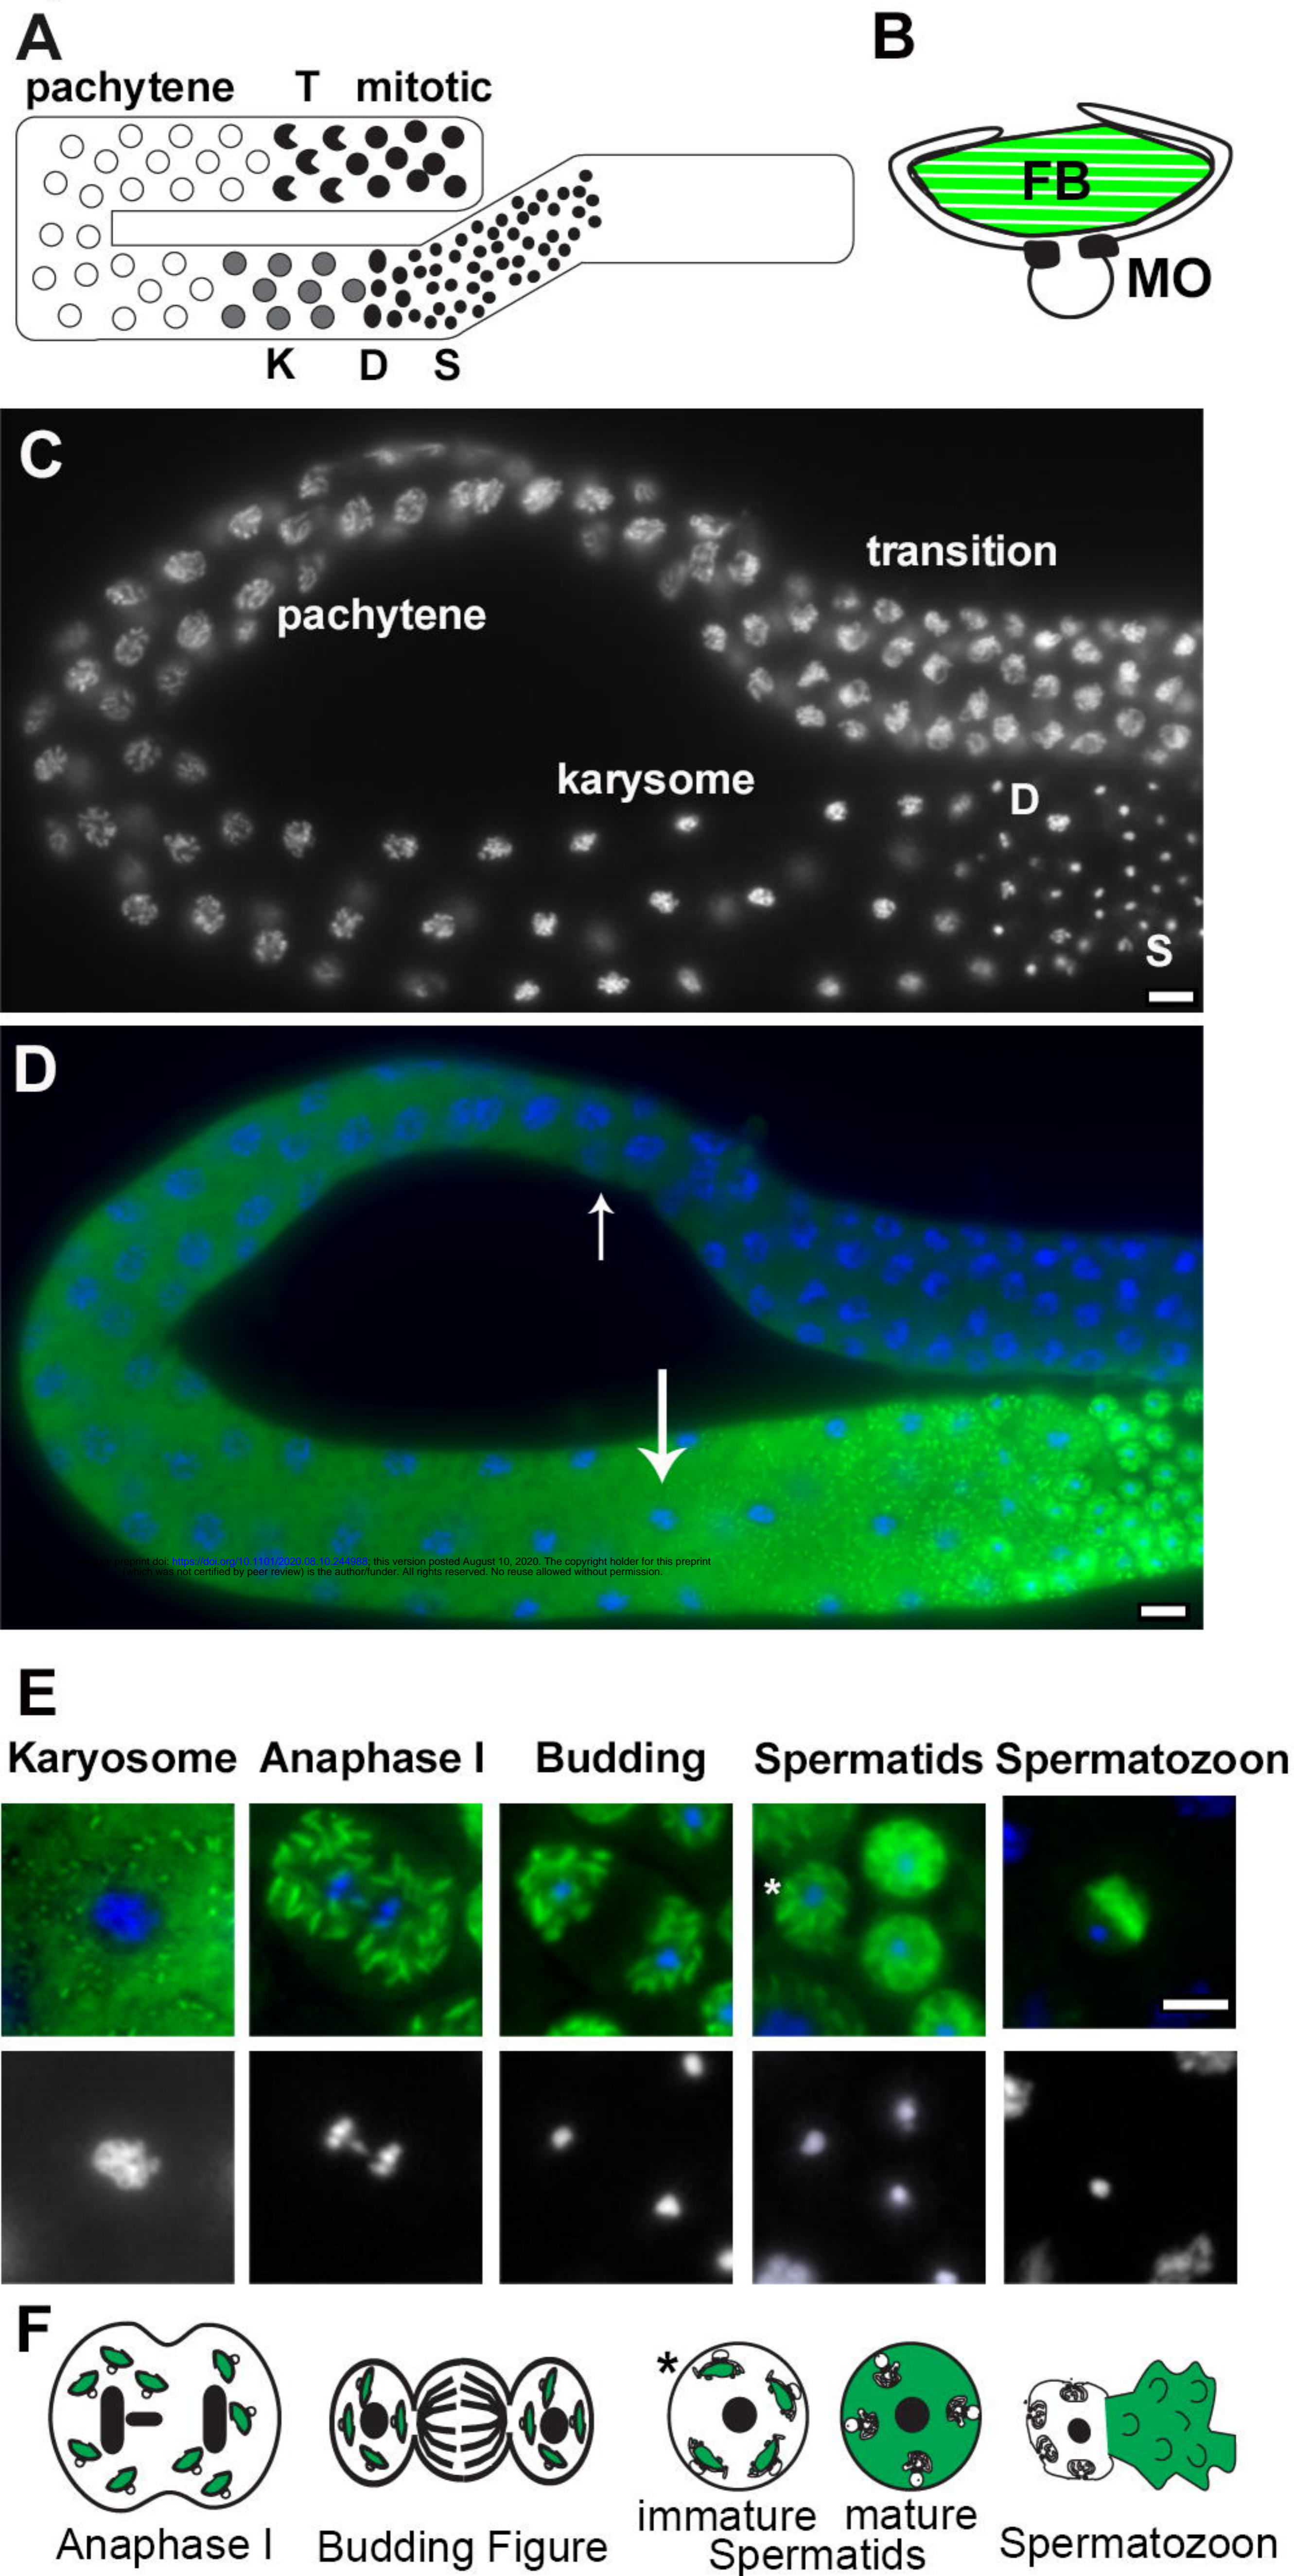

Figure 2

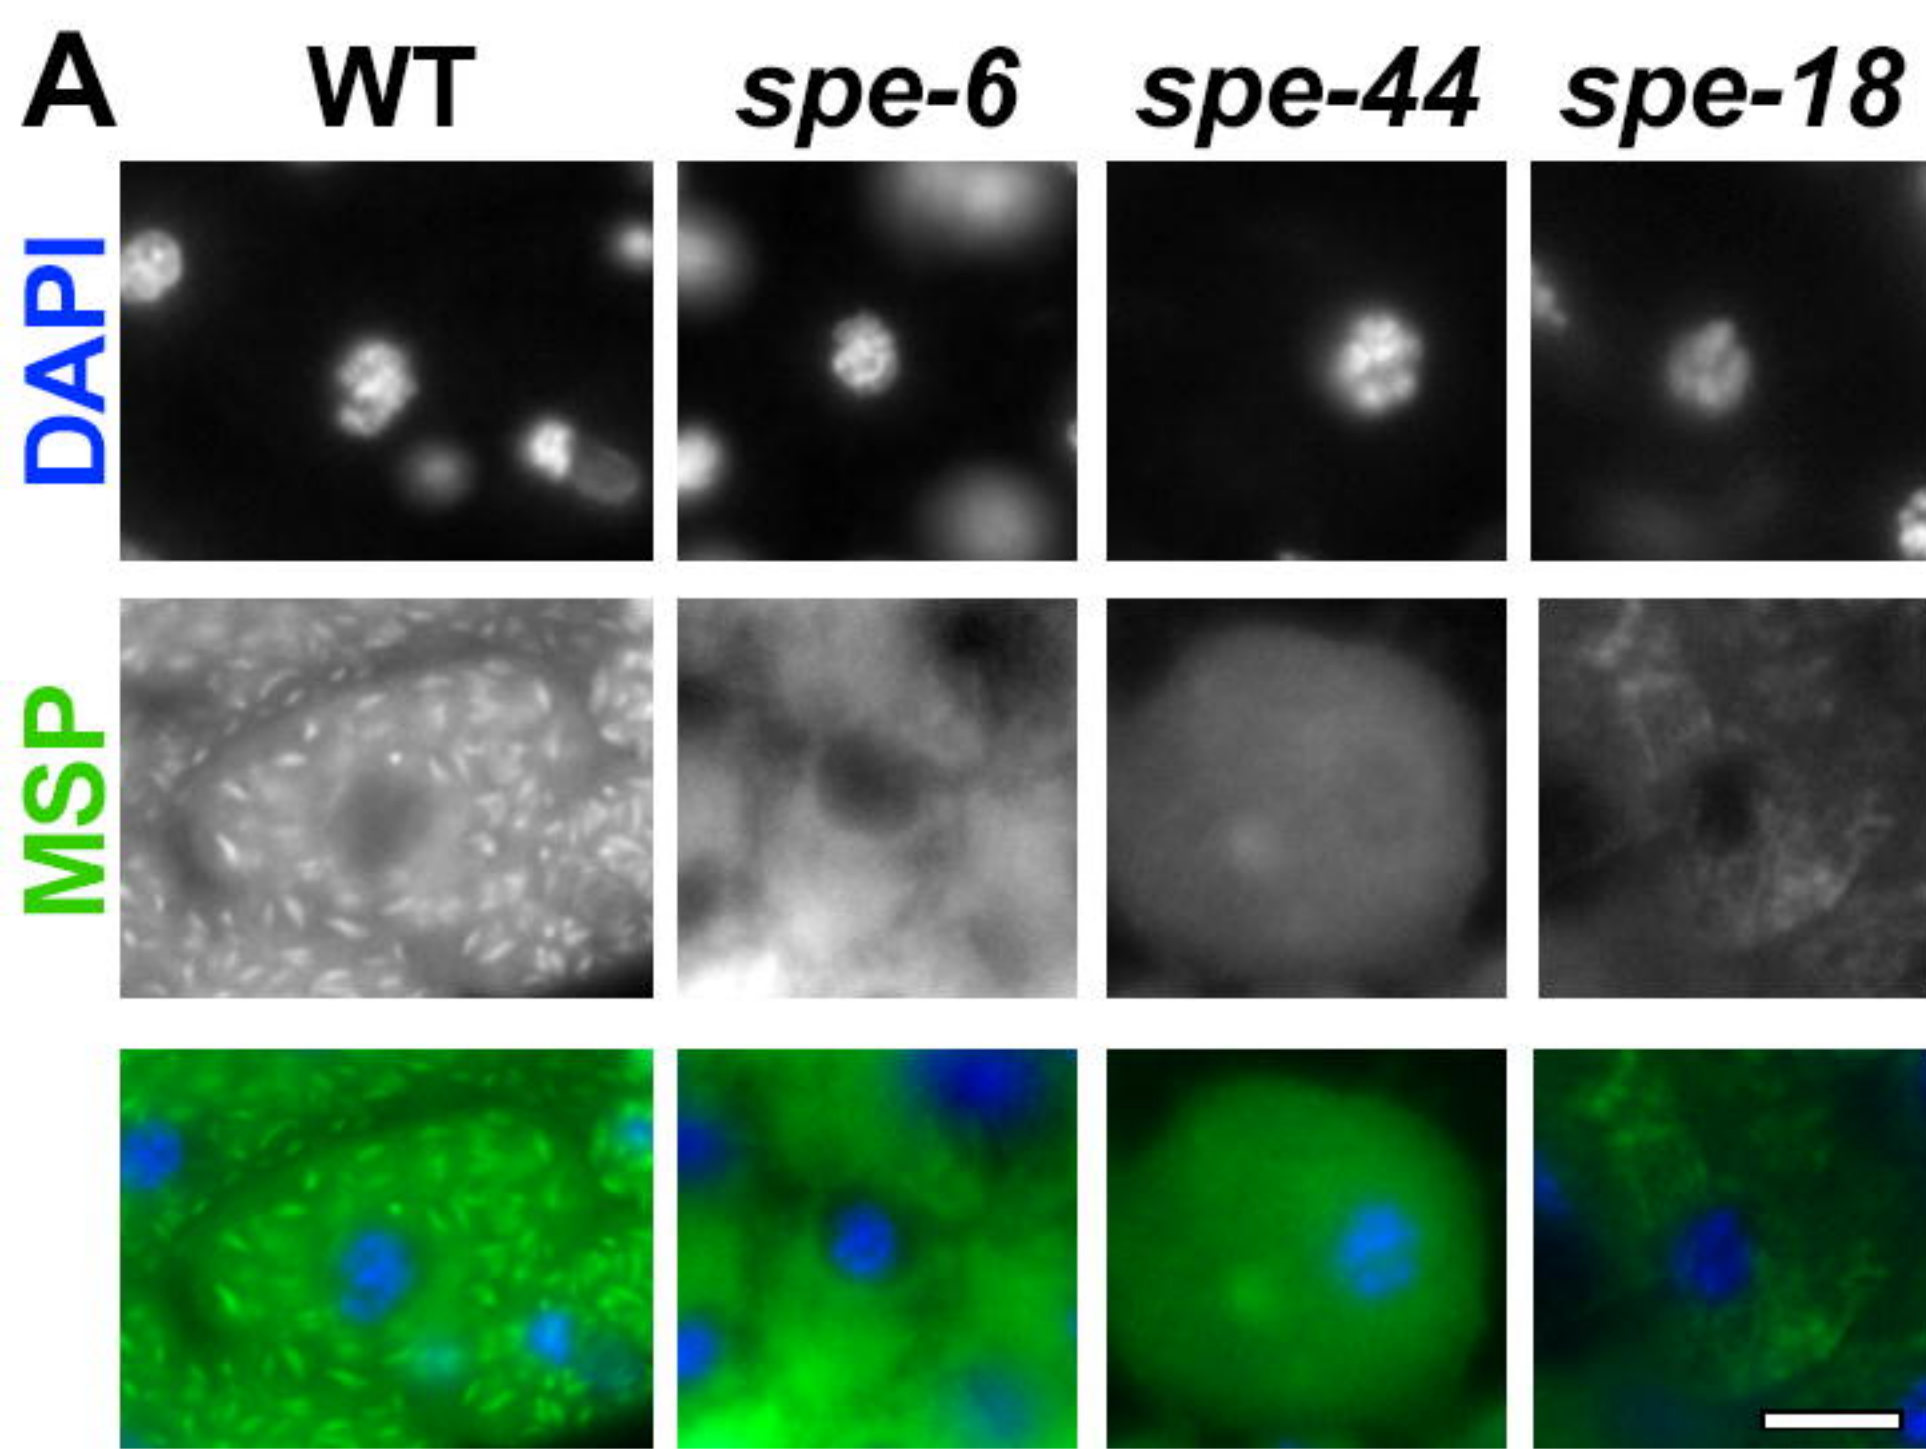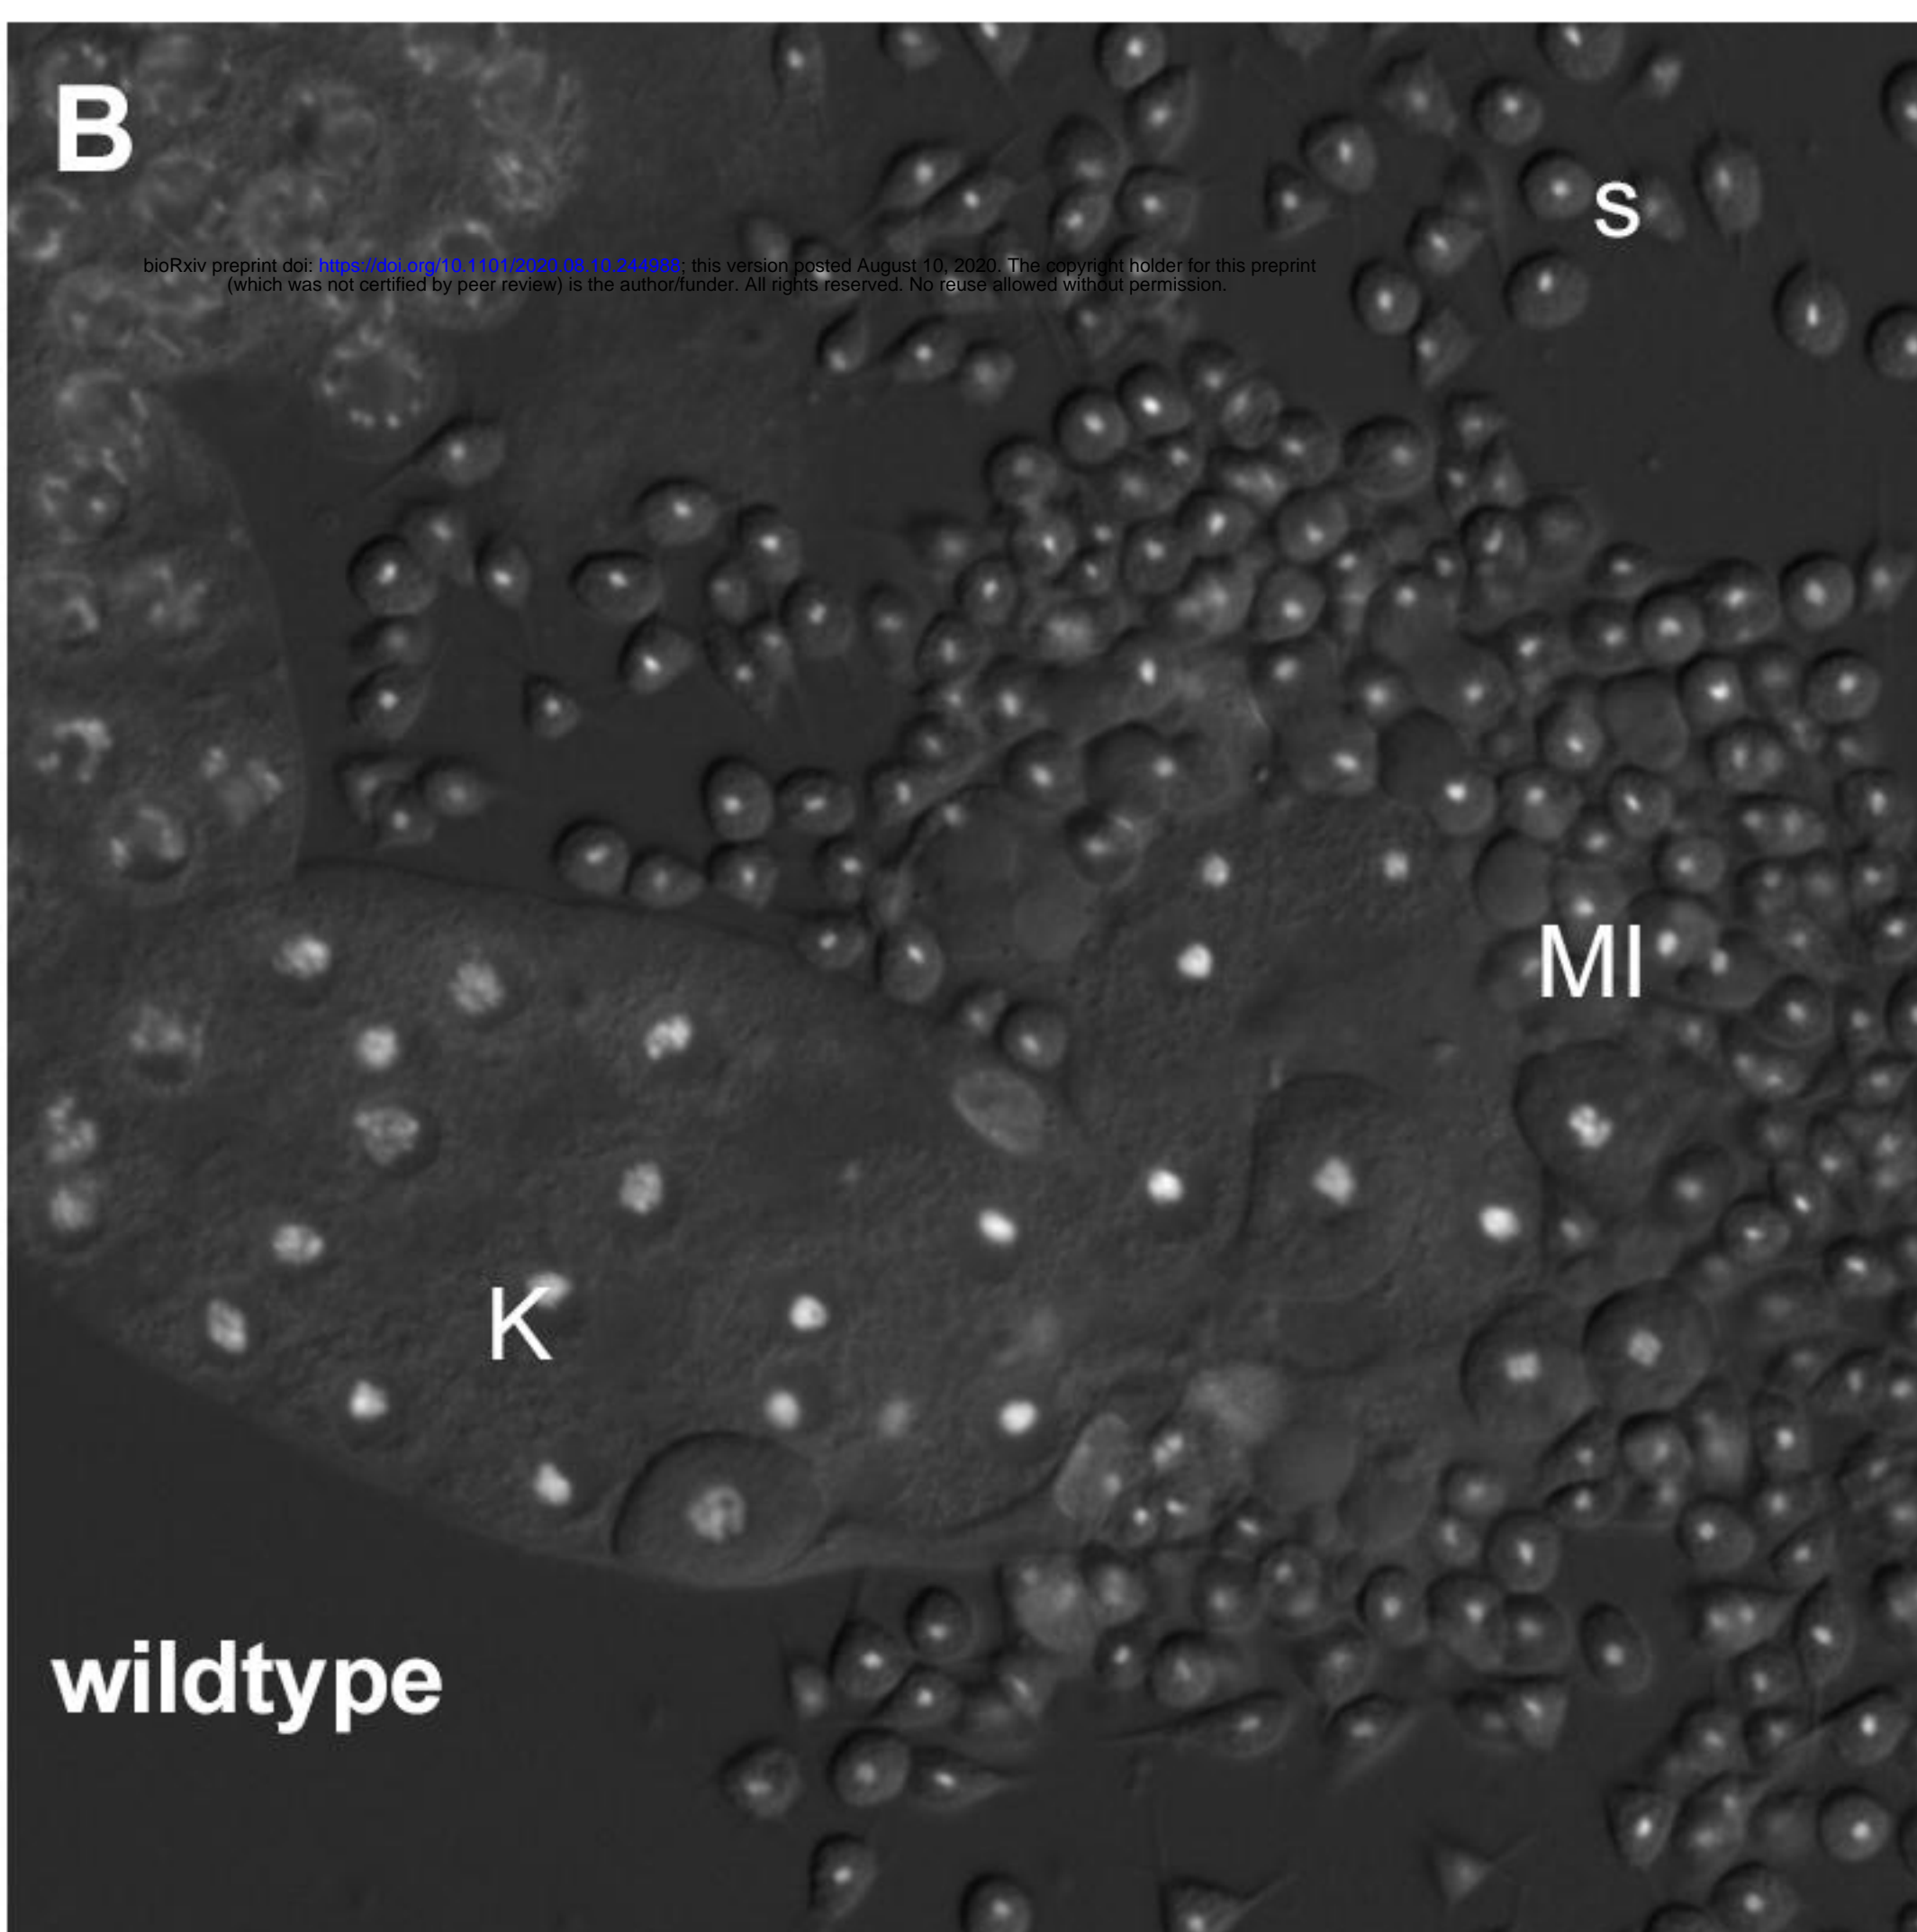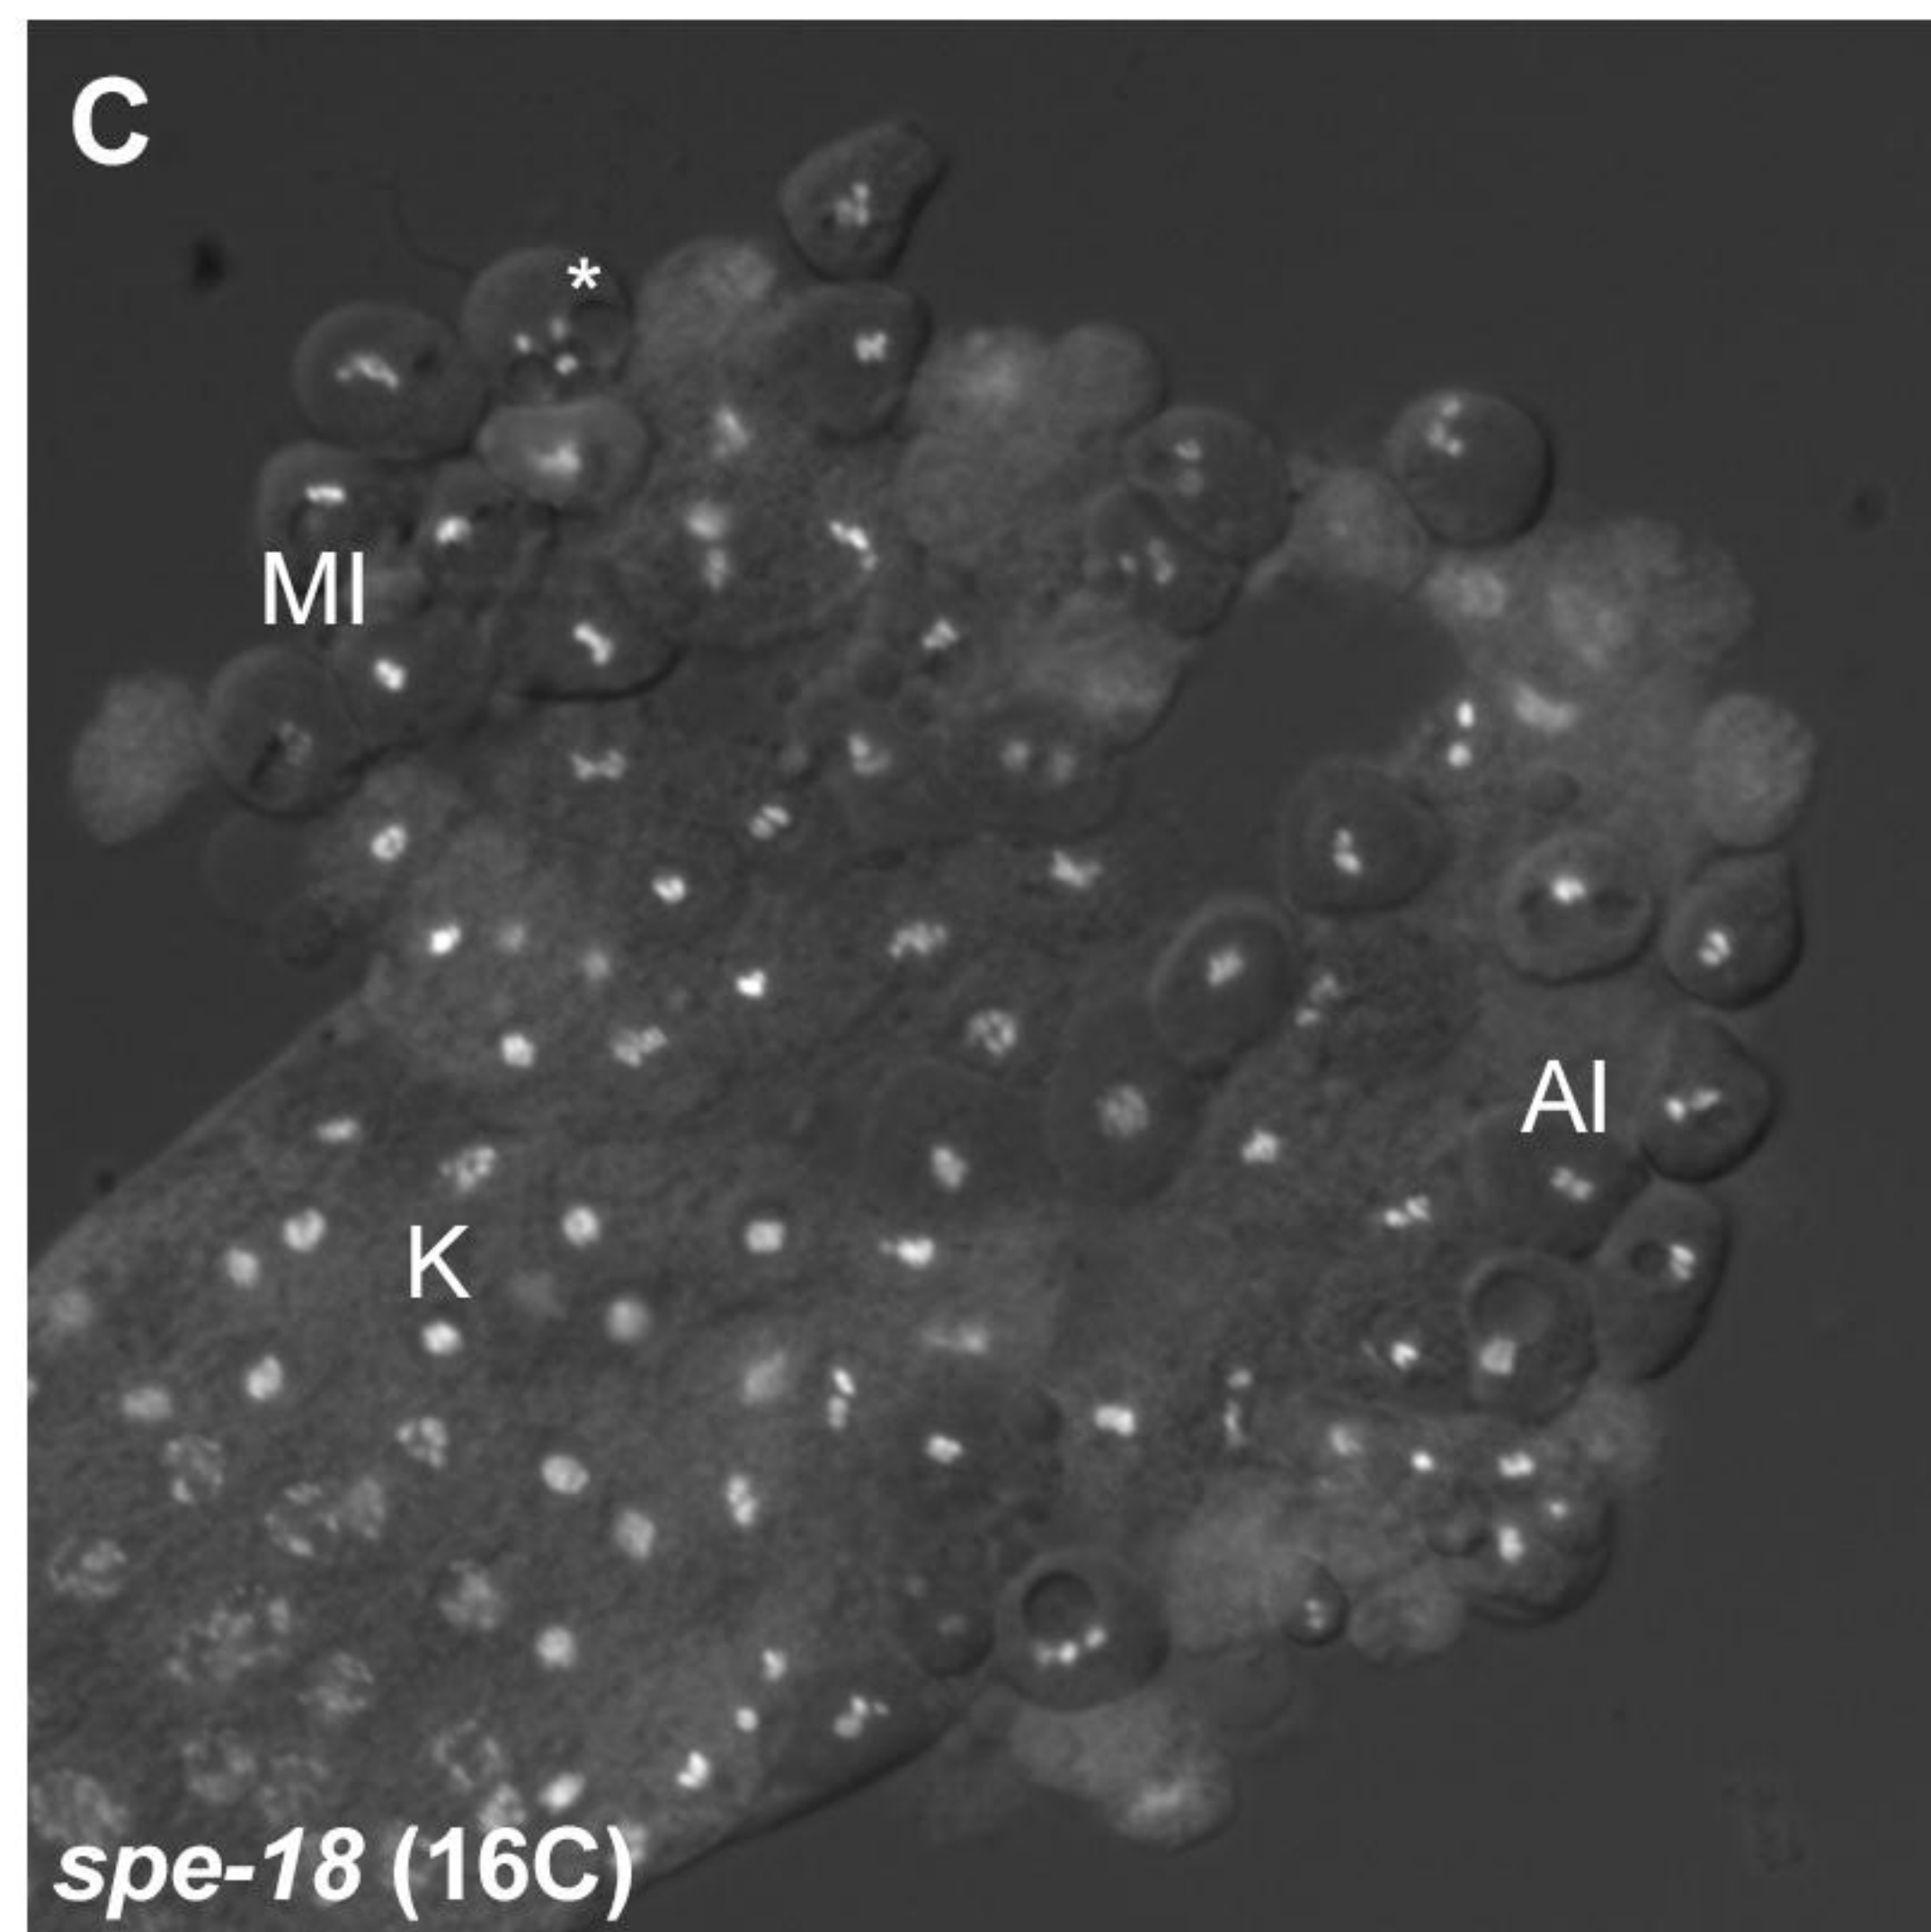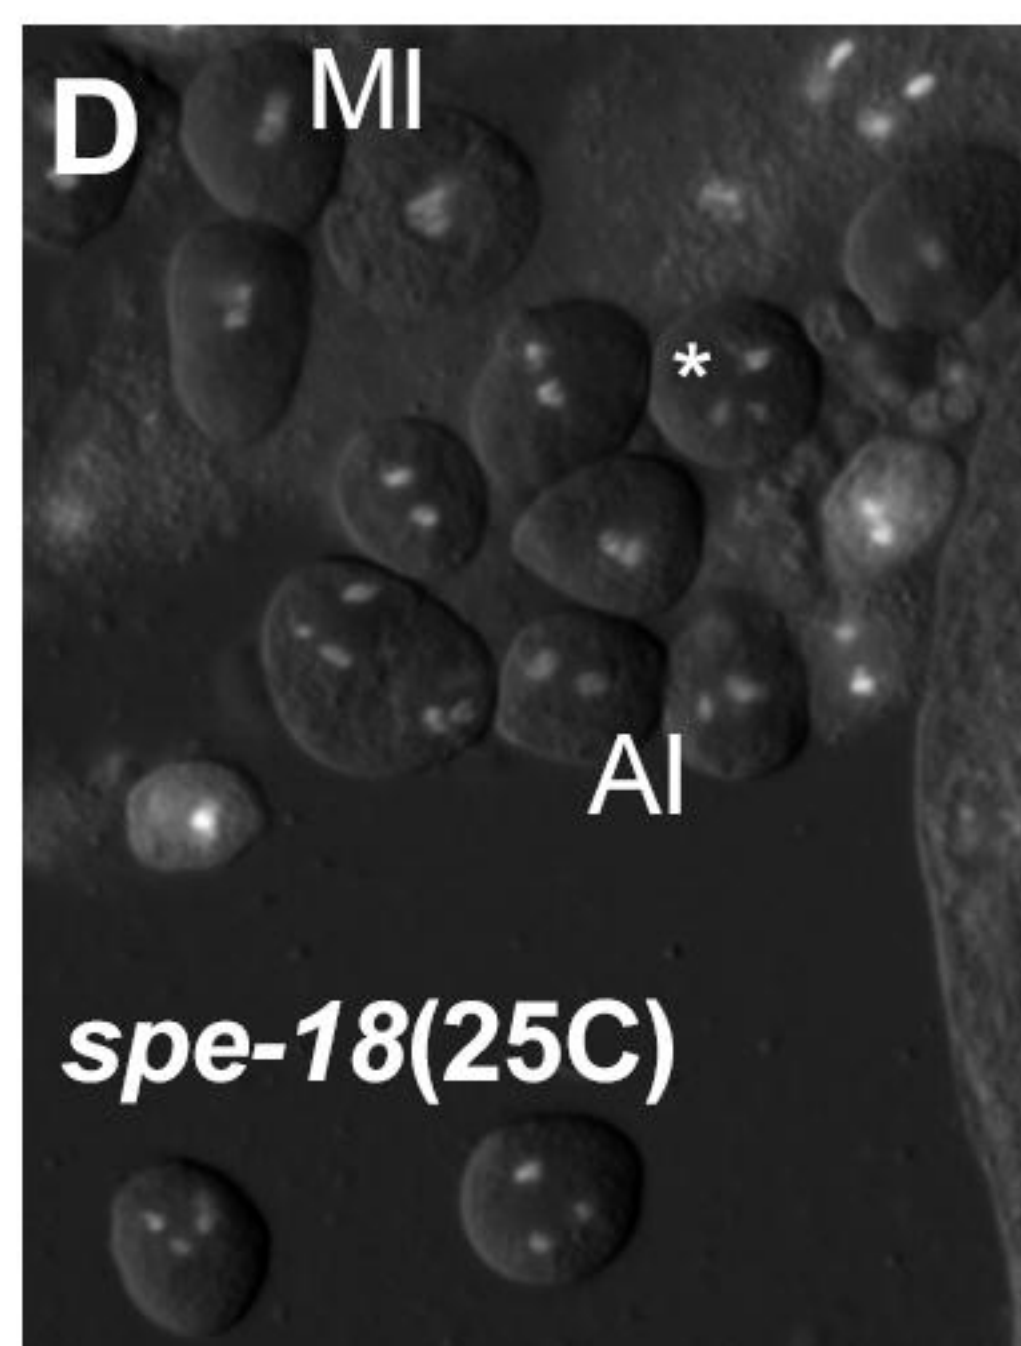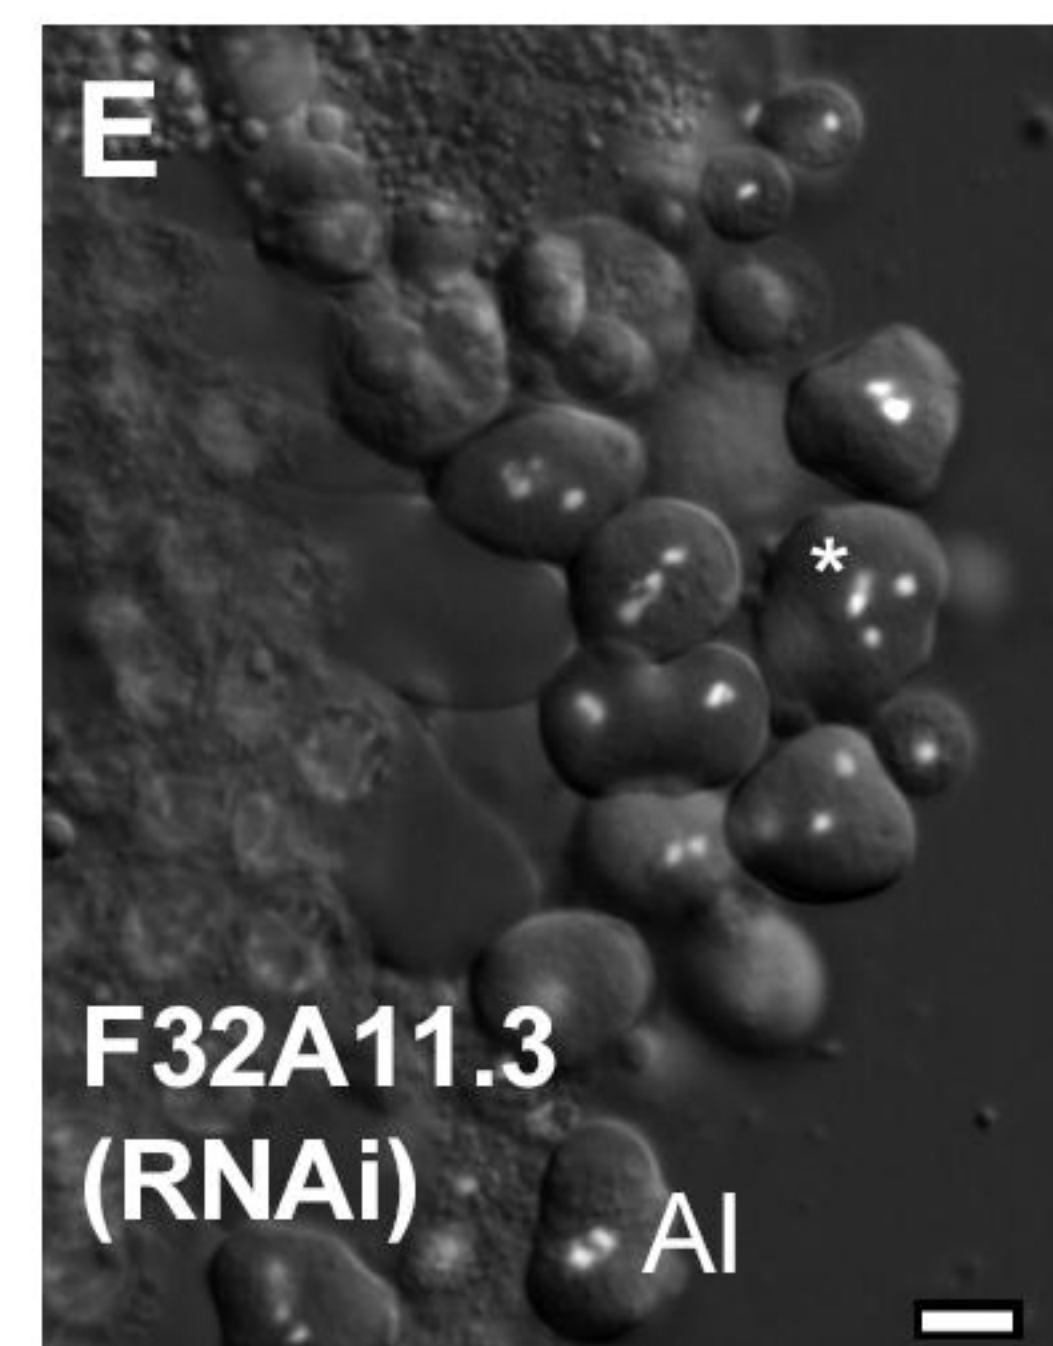

**A**

NP\_496792.1\_CAEL 1 MSYAQS FYADQKKVE KPAE --- QASSPATAAFPATTP IAEDPLTPSQIQDAIRLYRSVL 56  
 XP\_002630301.1\_CAEBR 1 MSFAQS FYADQKKVEEQPRQQENASPLTTAAIPAHTP IAEDPLTPAQIREAIRIYRSVL 59  
 XP\_003116785.1\_CAERE 1 MSFAKS FYADQKKVEEQP --- QQAASPI TASAIPATTP IAEDPLTPAQIQEAIRIYRSVL 56  
  
 NP\_496792.1\_CAEL 57 SLSASAPSPVPRQAAAPVAPEQPIVHSDYYG- GP SDIP LSYRVKYTTTQQ----- A 106  
 XP\_002630301.1\_CAEBR 60 ST- NSAPASPVRAPAAPP IAERP EVHSNYYGGGPTDIPQSYLLNYATSSP-QQPASAPA 116  
 XP\_003116785.1\_CAERE 57 S-- NSAPSSPVRAP- APPVQERPQVHSNYYGGGPTDIPQSYLLNYSTARGQQTVPVSAPV 112  
  
 NP\_496792.1\_CAEL 107 PASPAPDFT EQQLMAQLQALQIQQQQPAPDVPVVEPVQQVQKPKVAP--- KMLHKMY 162  
 XP\_002630301.1\_CAEBR 117 TQAP EPLFT EQQLIAQLQALQVQQQQAEPVCEVP-- VVQQQQPKAAPNKAPVLQKMY 173  
 XP\_003116785.1\_CAERE 113 TQVPEQHFT EQQLIAQLQALQLQQQQQEPTYAAP-- PPPV-QQQKVTPKRAPVLQKMY 168  
  
 NP\_496792.1\_CAEL 163 DDEESGYCFARKKD-- VEQEEVPEIHSV AAVTTP IPTYSAP P----- VNYEAPVFN 212  
 XP\_002630301.1\_CAEBR 174 DDEESGYCFNRKGR- DEDGPEE IPEAHVATPTSAPAANY SIPAP--- QQQVNYSPAPVA 228  
 XP\_003116785.1\_CAERE 169 DDEESGYCFARVKQEDNEVADEVPEAHVATPTSAPQATYSAPQANY SAPQVNYSPAPVS 227  
  
 NP\_496792.1\_CAEL 213 NYYSKGVSGPSEYIGMSNDCKFIYDNQSVPASYAQKNEYTLVNAAQTAAPVINYROEE 271  
 XP\_002630301.1\_CAEBR 229 NNYSKVVCGPS EYIGMANDNKF IYDAQKALPVSYAQNNSYTLVNPTAQA-PIAQPRFEE 286  
 XP\_003116785.1\_CAERE 228 NNYSRGVSGPSEYIGMSNDSKFIYDAQKALPA-YNQNNTYTLVNATPVA-PVMIHRQEE 284  
  
 NP\_496792.1\_CAEL 272 OEEH---GGEDITQVPASPAVTSRFRGLIKNAQTPVQA-TAP I VVER ITP----- 317  
 XP\_002630301.1\_CAEBR 287 TDDQGVTTT EDVTQVPASPAVTSRFRGMIRNAQTPVQAPPAP I VVERVAEPV---NTTP 342  
 XP\_003116785.1\_CAERE 285 SDDQGMTTTE DVTQVPASPAVLSRFRGLIRNAQTPTKS-VAP I VVERIAEPPVHQQVTP 342  
  
 NP\_496792.1\_CAEL 318 -VAQNSYGA FMPVNQM SMES EYQLPVLNDLASCIEHY 353  
 XP\_002630301.1\_CAEBR 343 SHNYNNYGAFMPVNQMSMESEYQLPVLNDLASCIEHY 379  
 XP\_003116785.1\_CAERE 343 SHNYNNYGA FQPINQMSMESEYQLPVLNDLASCIEHY 379

**B**

XP\_002630301.1\_CAEBR 239 SEYIGMANDNKF IYD  
 NP\_496792.1\_CAEL 223 SEYIGMSNDCKFIYD  
 XP\_003116785.1\_CAERE 238 SEYIGMSNDSKFIYD  
 VDM53047.1\_ANGCS 230 SKYIGIPNDLFLAYR  
 VDL85248.1\_NIPBR 264 SMYVGIPNDLYPAYR  
 CDJ89879.1\_HAECO 228 SEYVGIPNDLFPAYR  
 KJH41306.1\_DICVI 244 SEYLGFPDDLYLAYR  
 EYC26956.1\_ANCCE 49 SEYVGIPNDLFPAYR  
 KHJ87664.1\_OESDE 28 SEYLGIPNDLYPAYR  
  
 XP\_002630301.1\_CAEBR 351 AFMPVNQMSMESEYQLPVLNDLASCIE  
 NP\_496792.1\_CAEL 325 AFMPVNQMSMESEYQLPVLNDLASCIE  
 XP\_003116785.1\_CAERE 351 AFQPINQMSMESEYQLPVLNDLASCIE  
 VDM53047.1\_ANGCS 343 ALTHVKPAAVLSEYQVEDLNDLTSCVD  
 VDL85248.1\_NIPBR 398 AFTPVSN-PRPSEYHAEDLNDLASCVD  
 CDJ89879.1\_HAECO 317 AFSPVSY-PQISEYQLGDLNDLTSFID  
 KJH41306.1\_DICVI 352 AFTPVGH-MAISEYQLEDLNDLVSCID  
 EYC26956.1\_ANCCE 162 AFAPVGQ-PLISEYQYEDLNDLASCID  
 KHJ87664.1\_OESDE 130 AFAPVGQ-PQVSEYQFEDLNDLASCID

**C**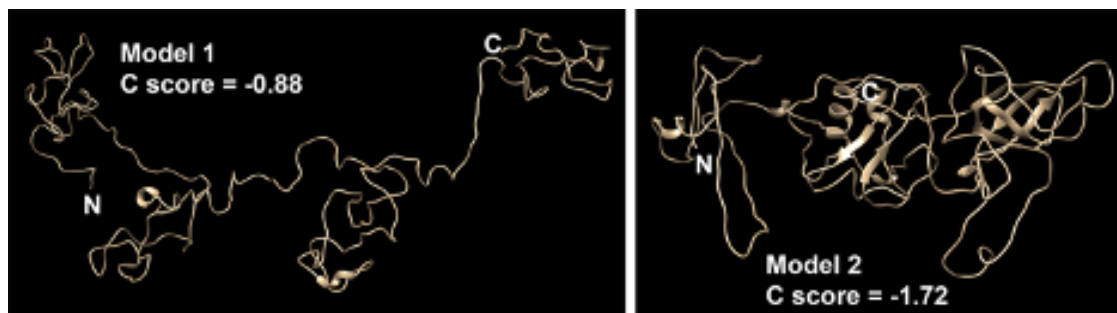

Figure 3



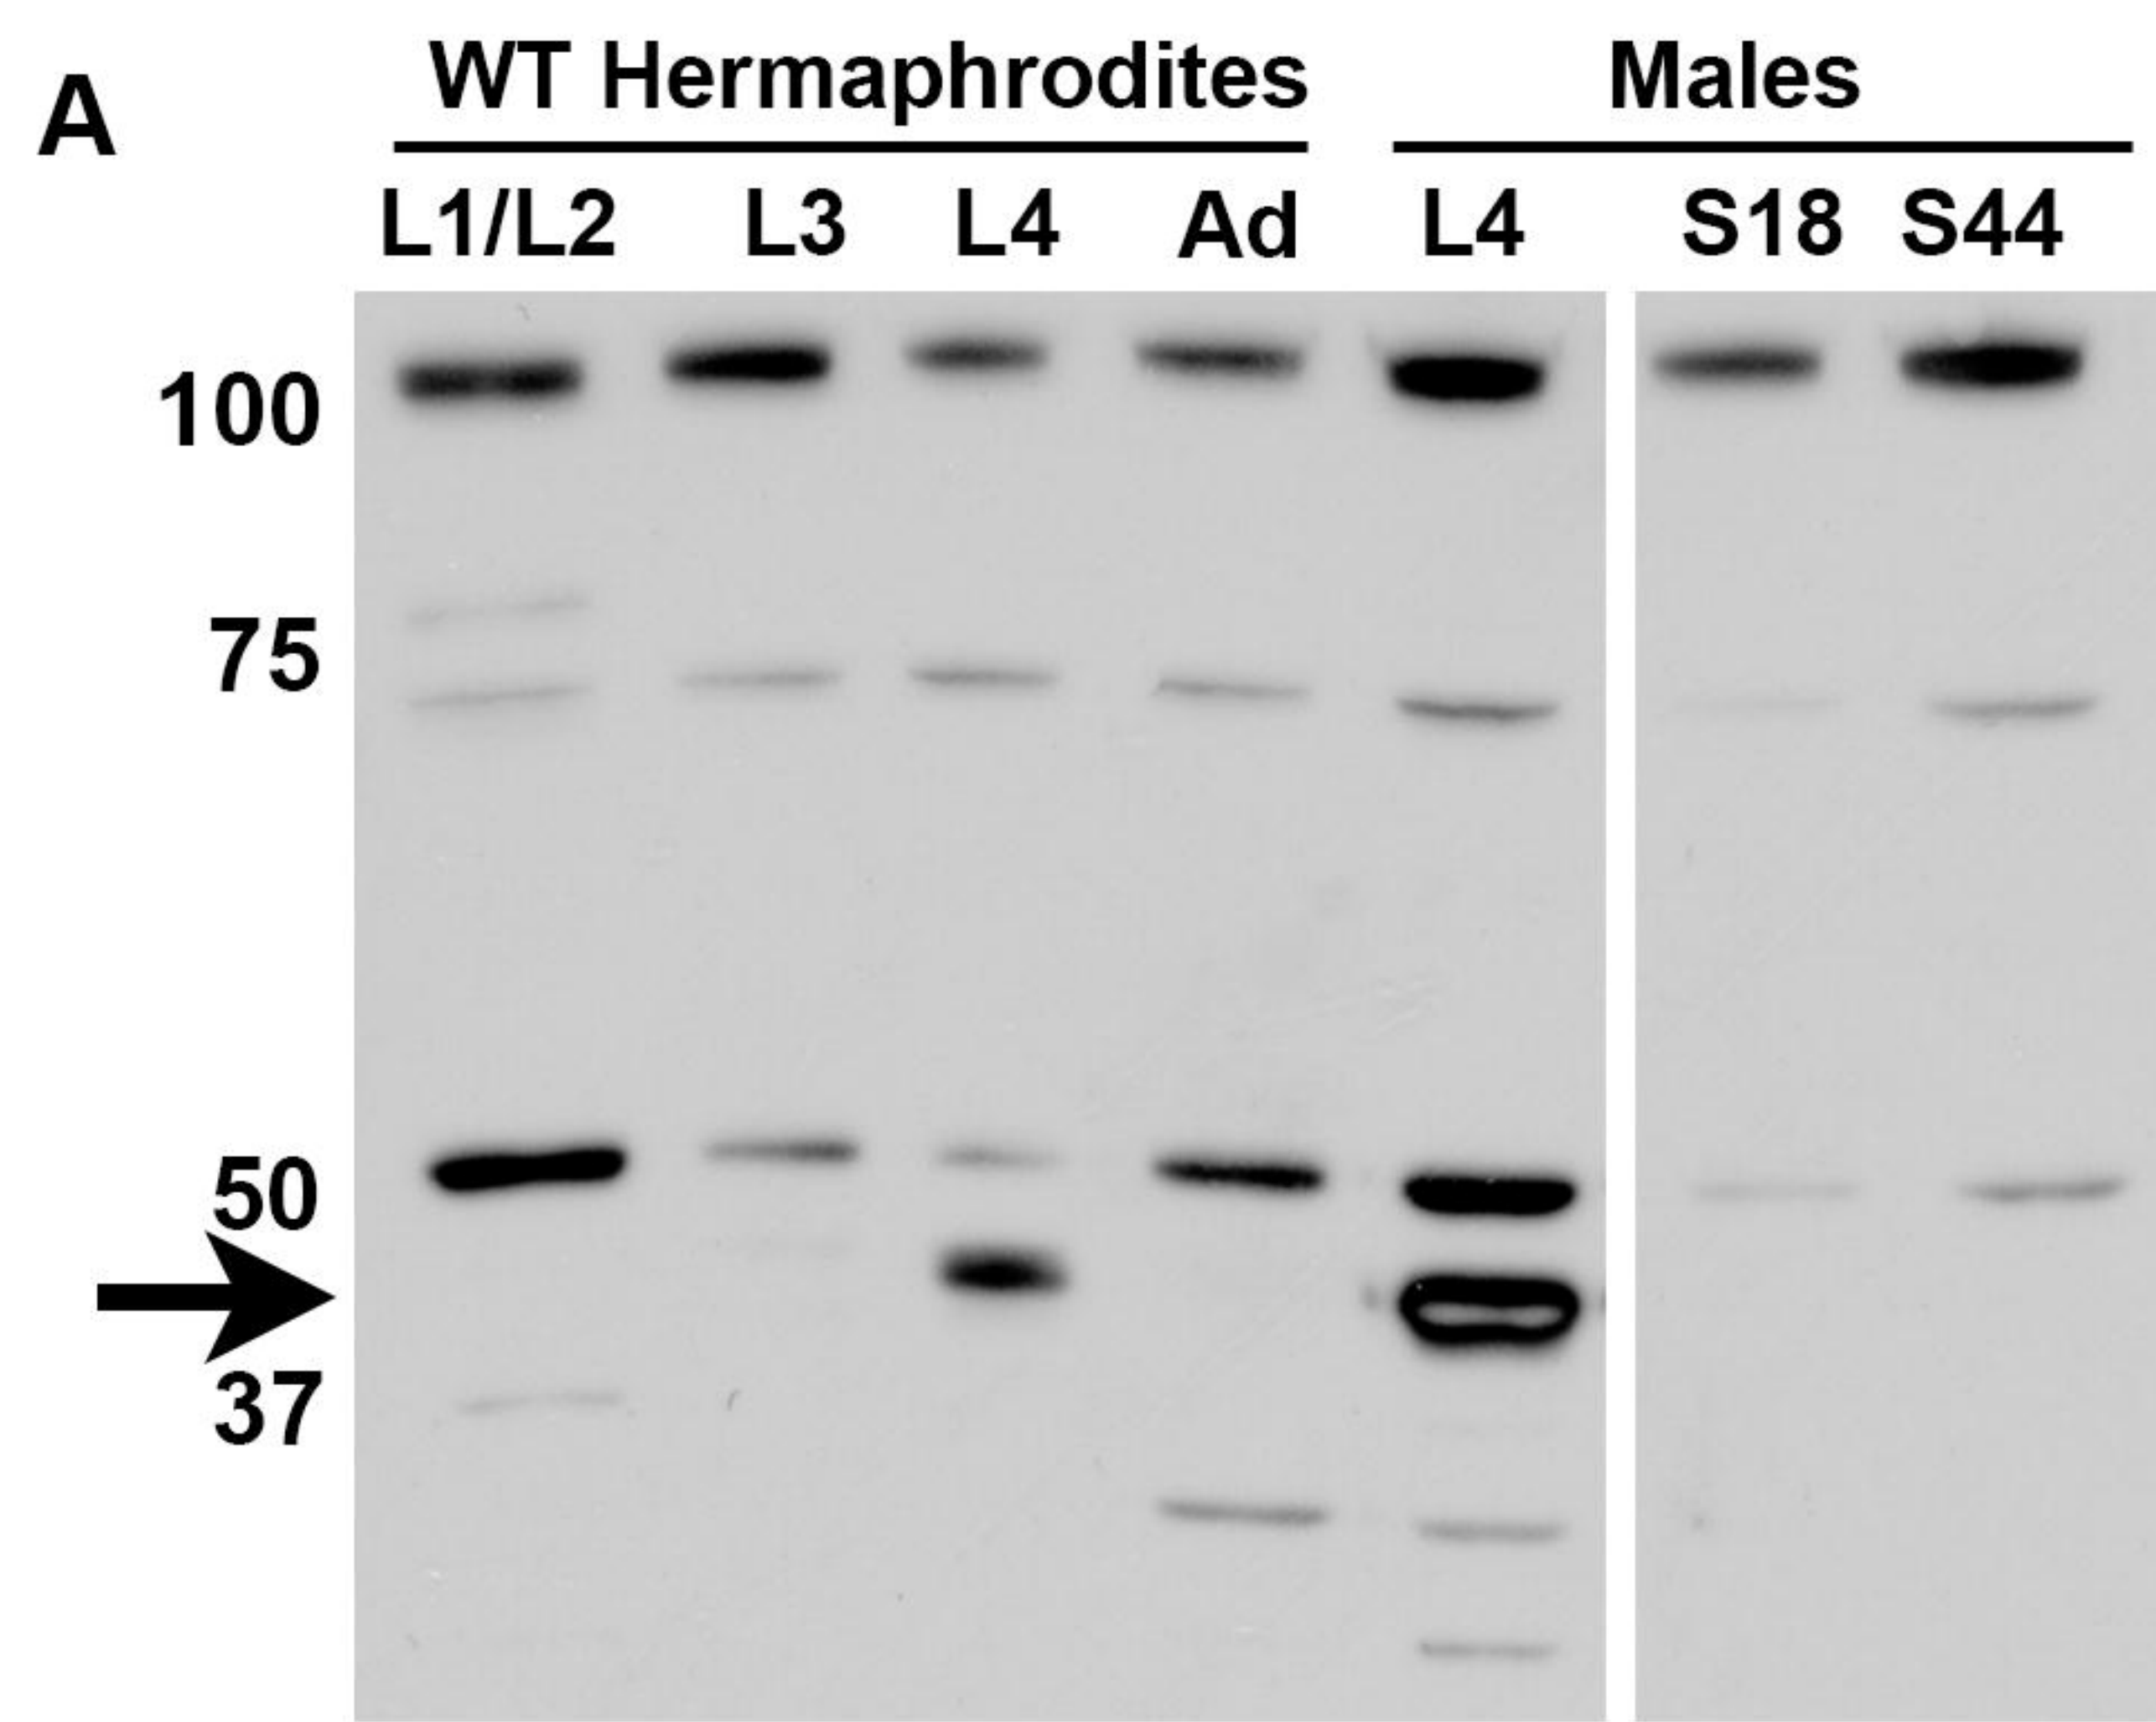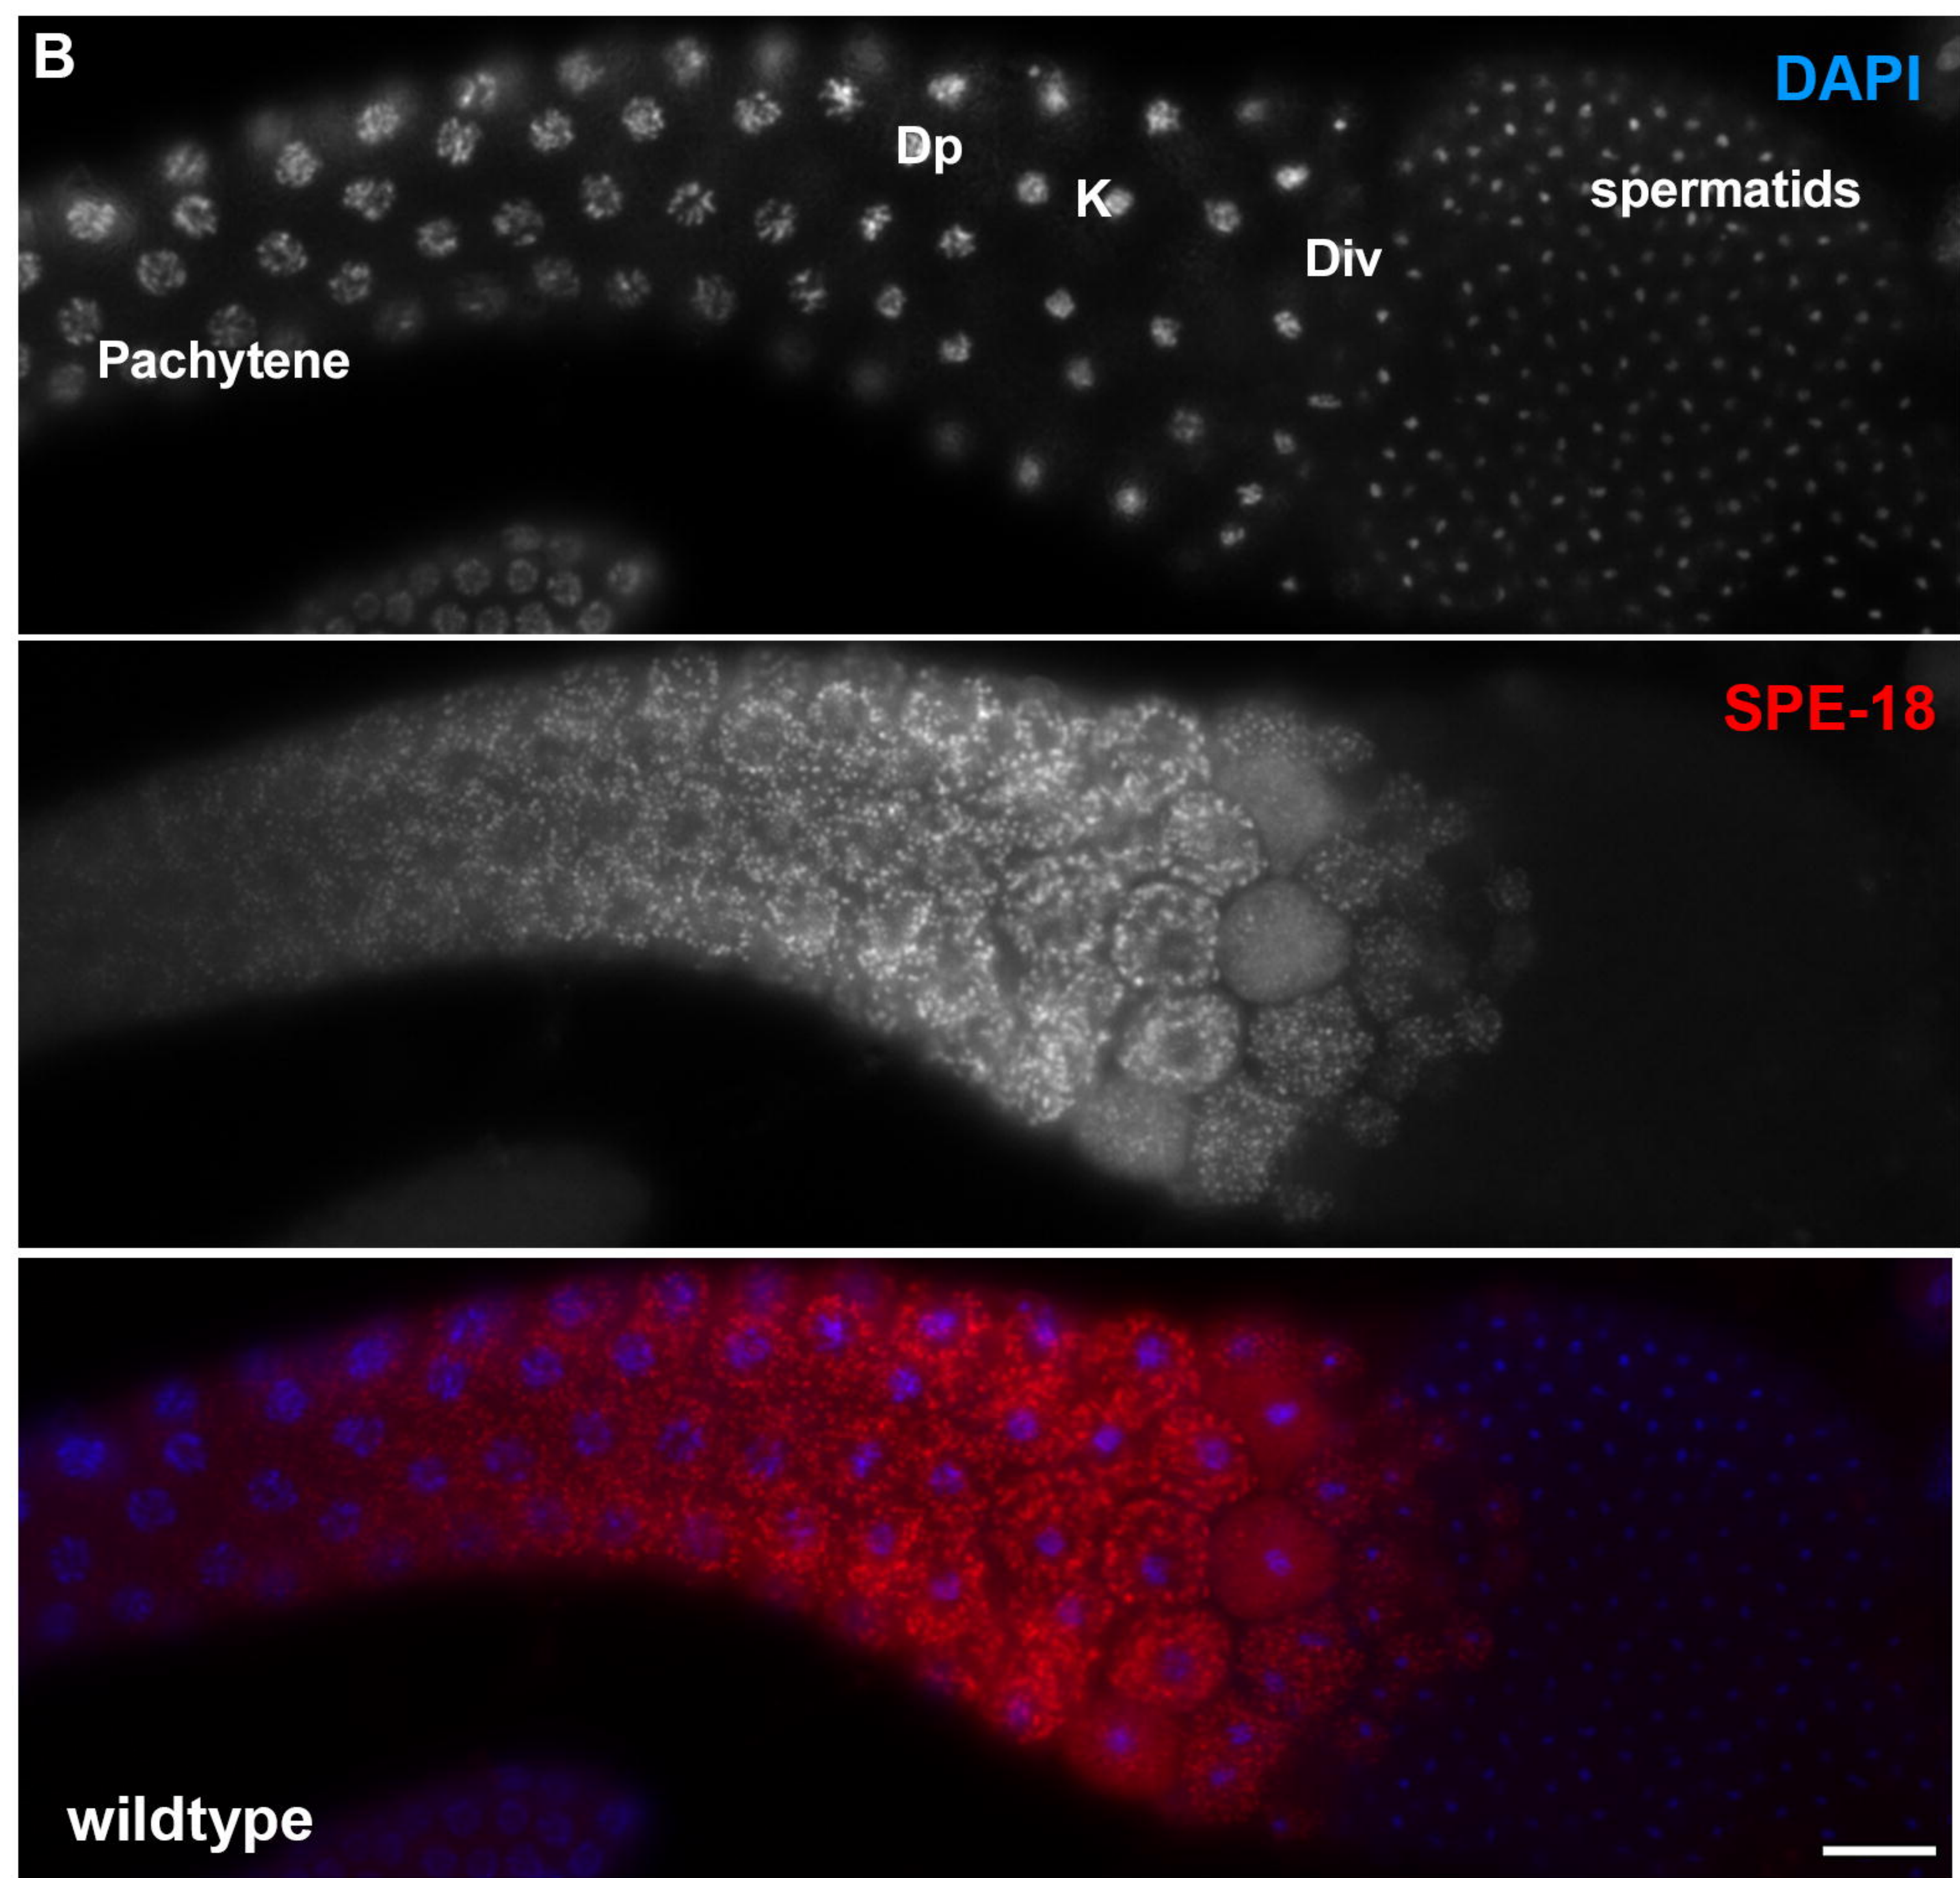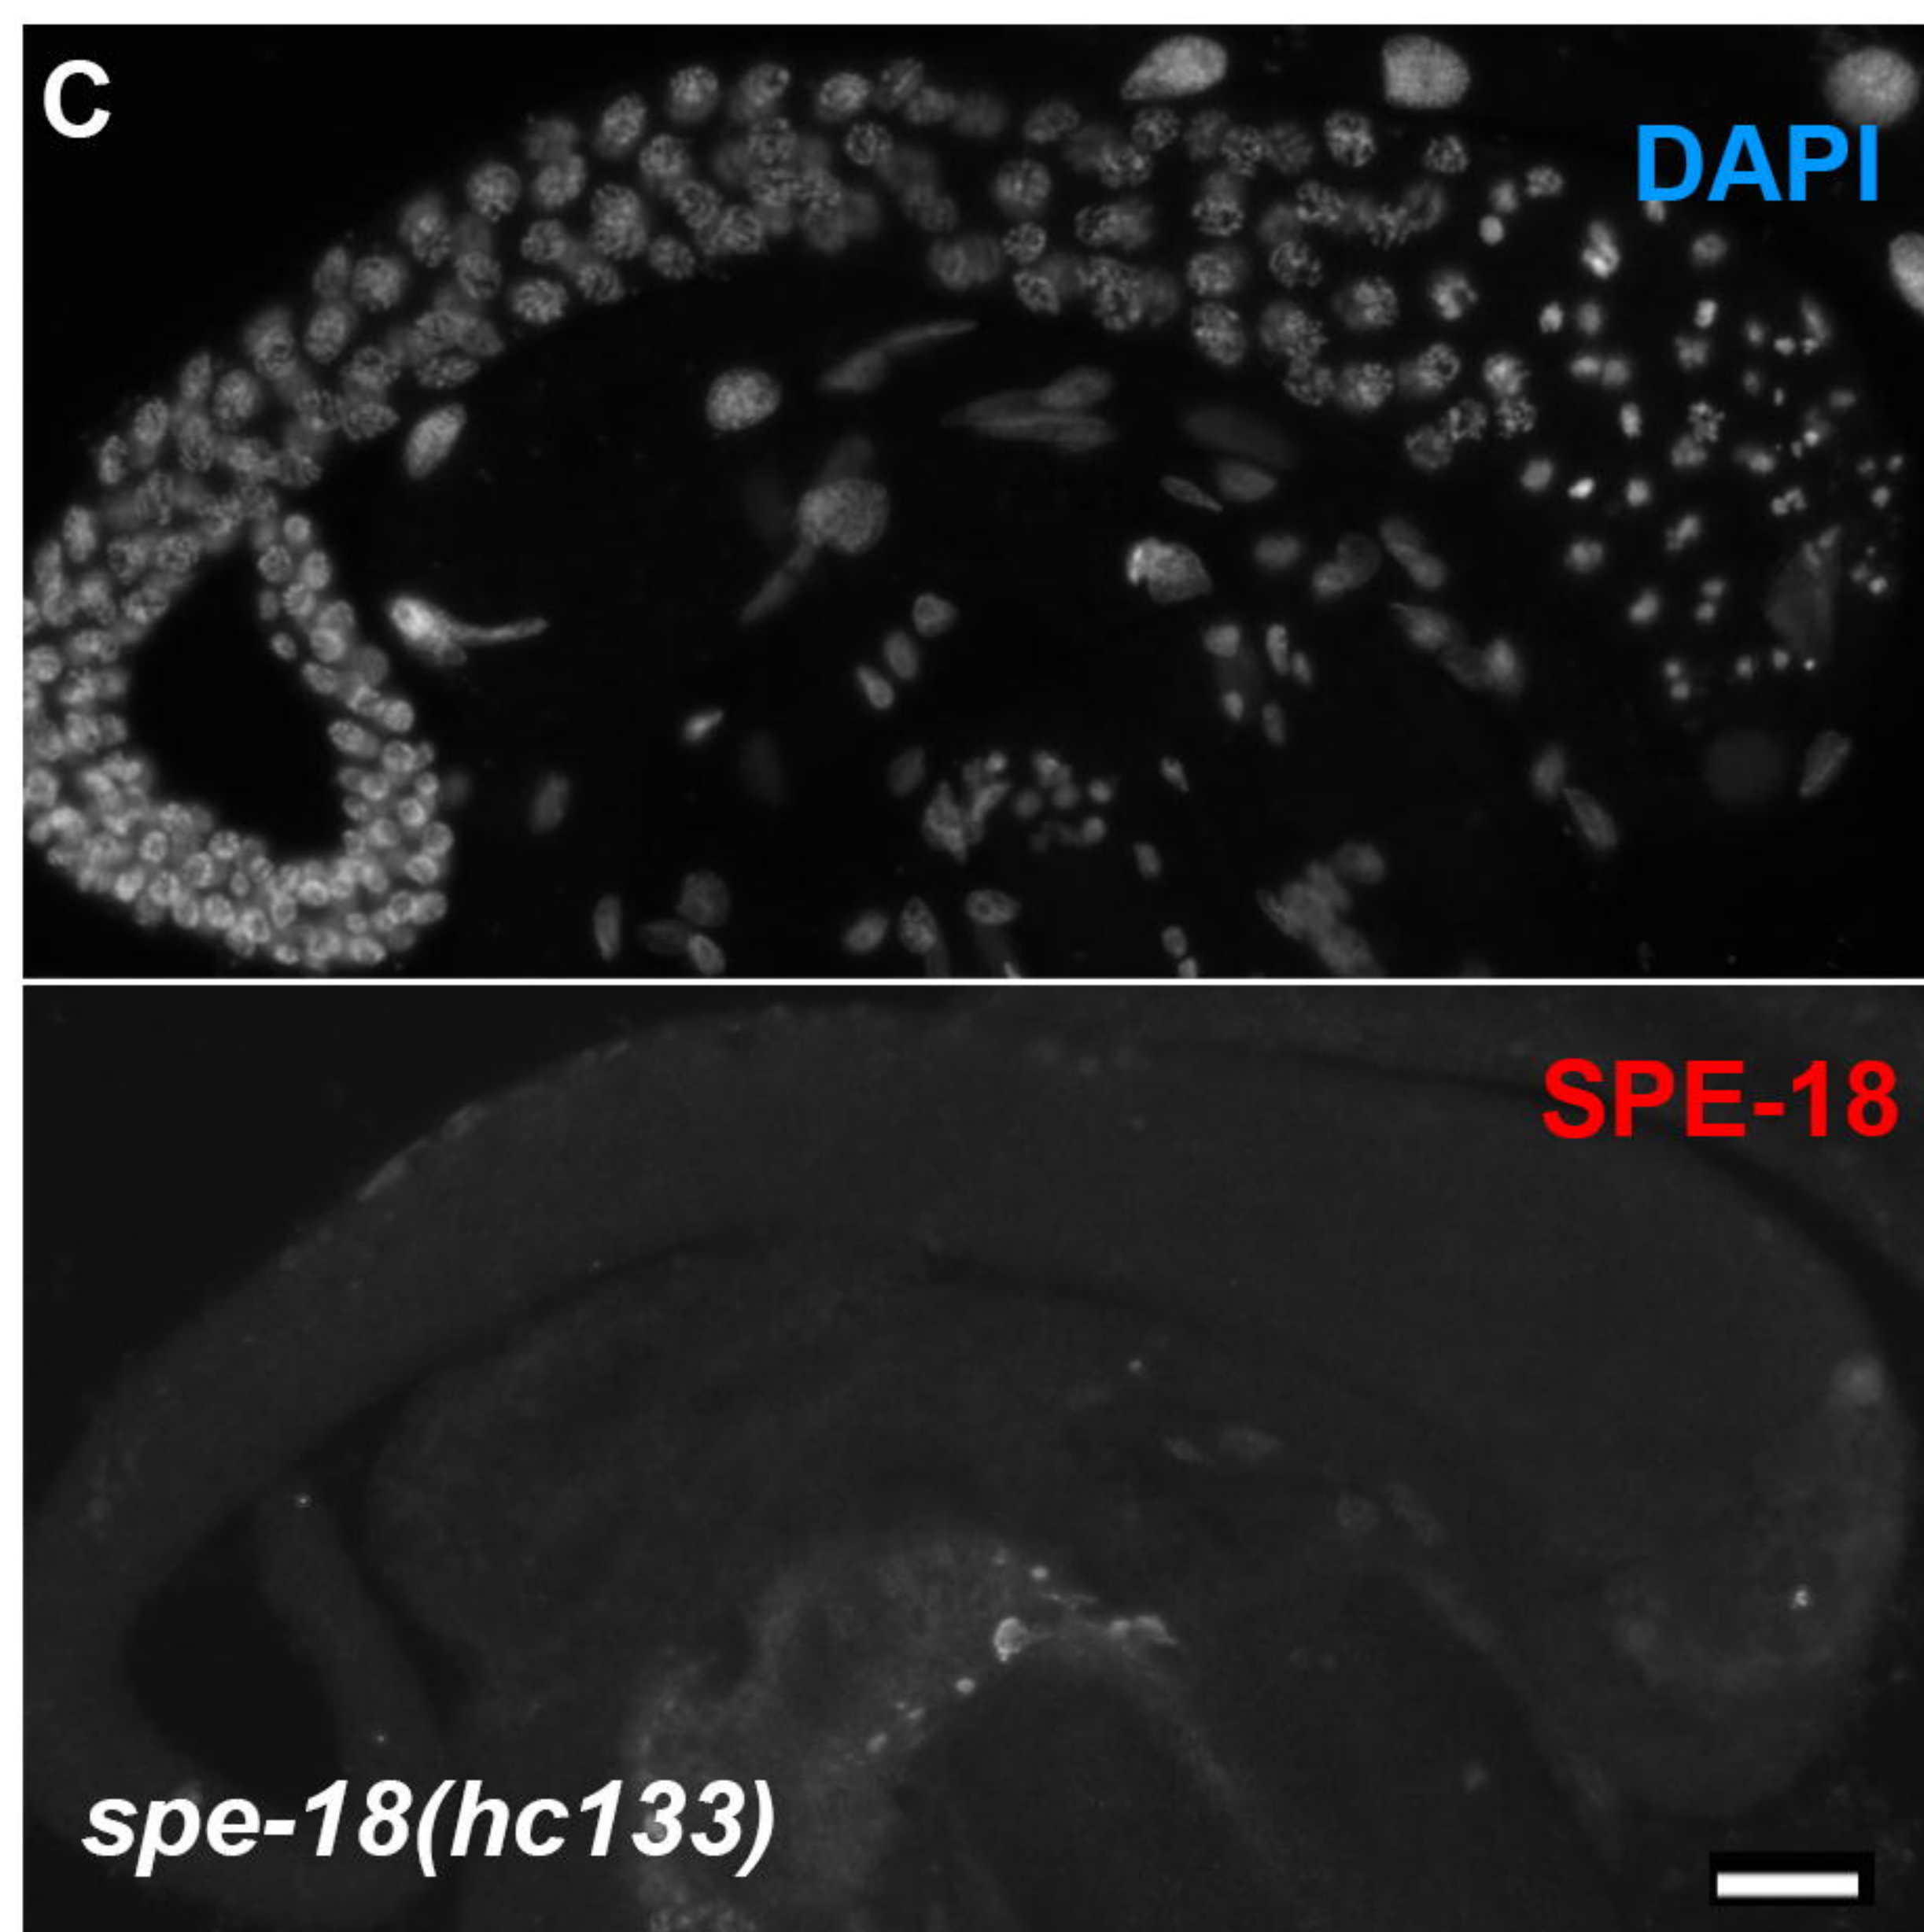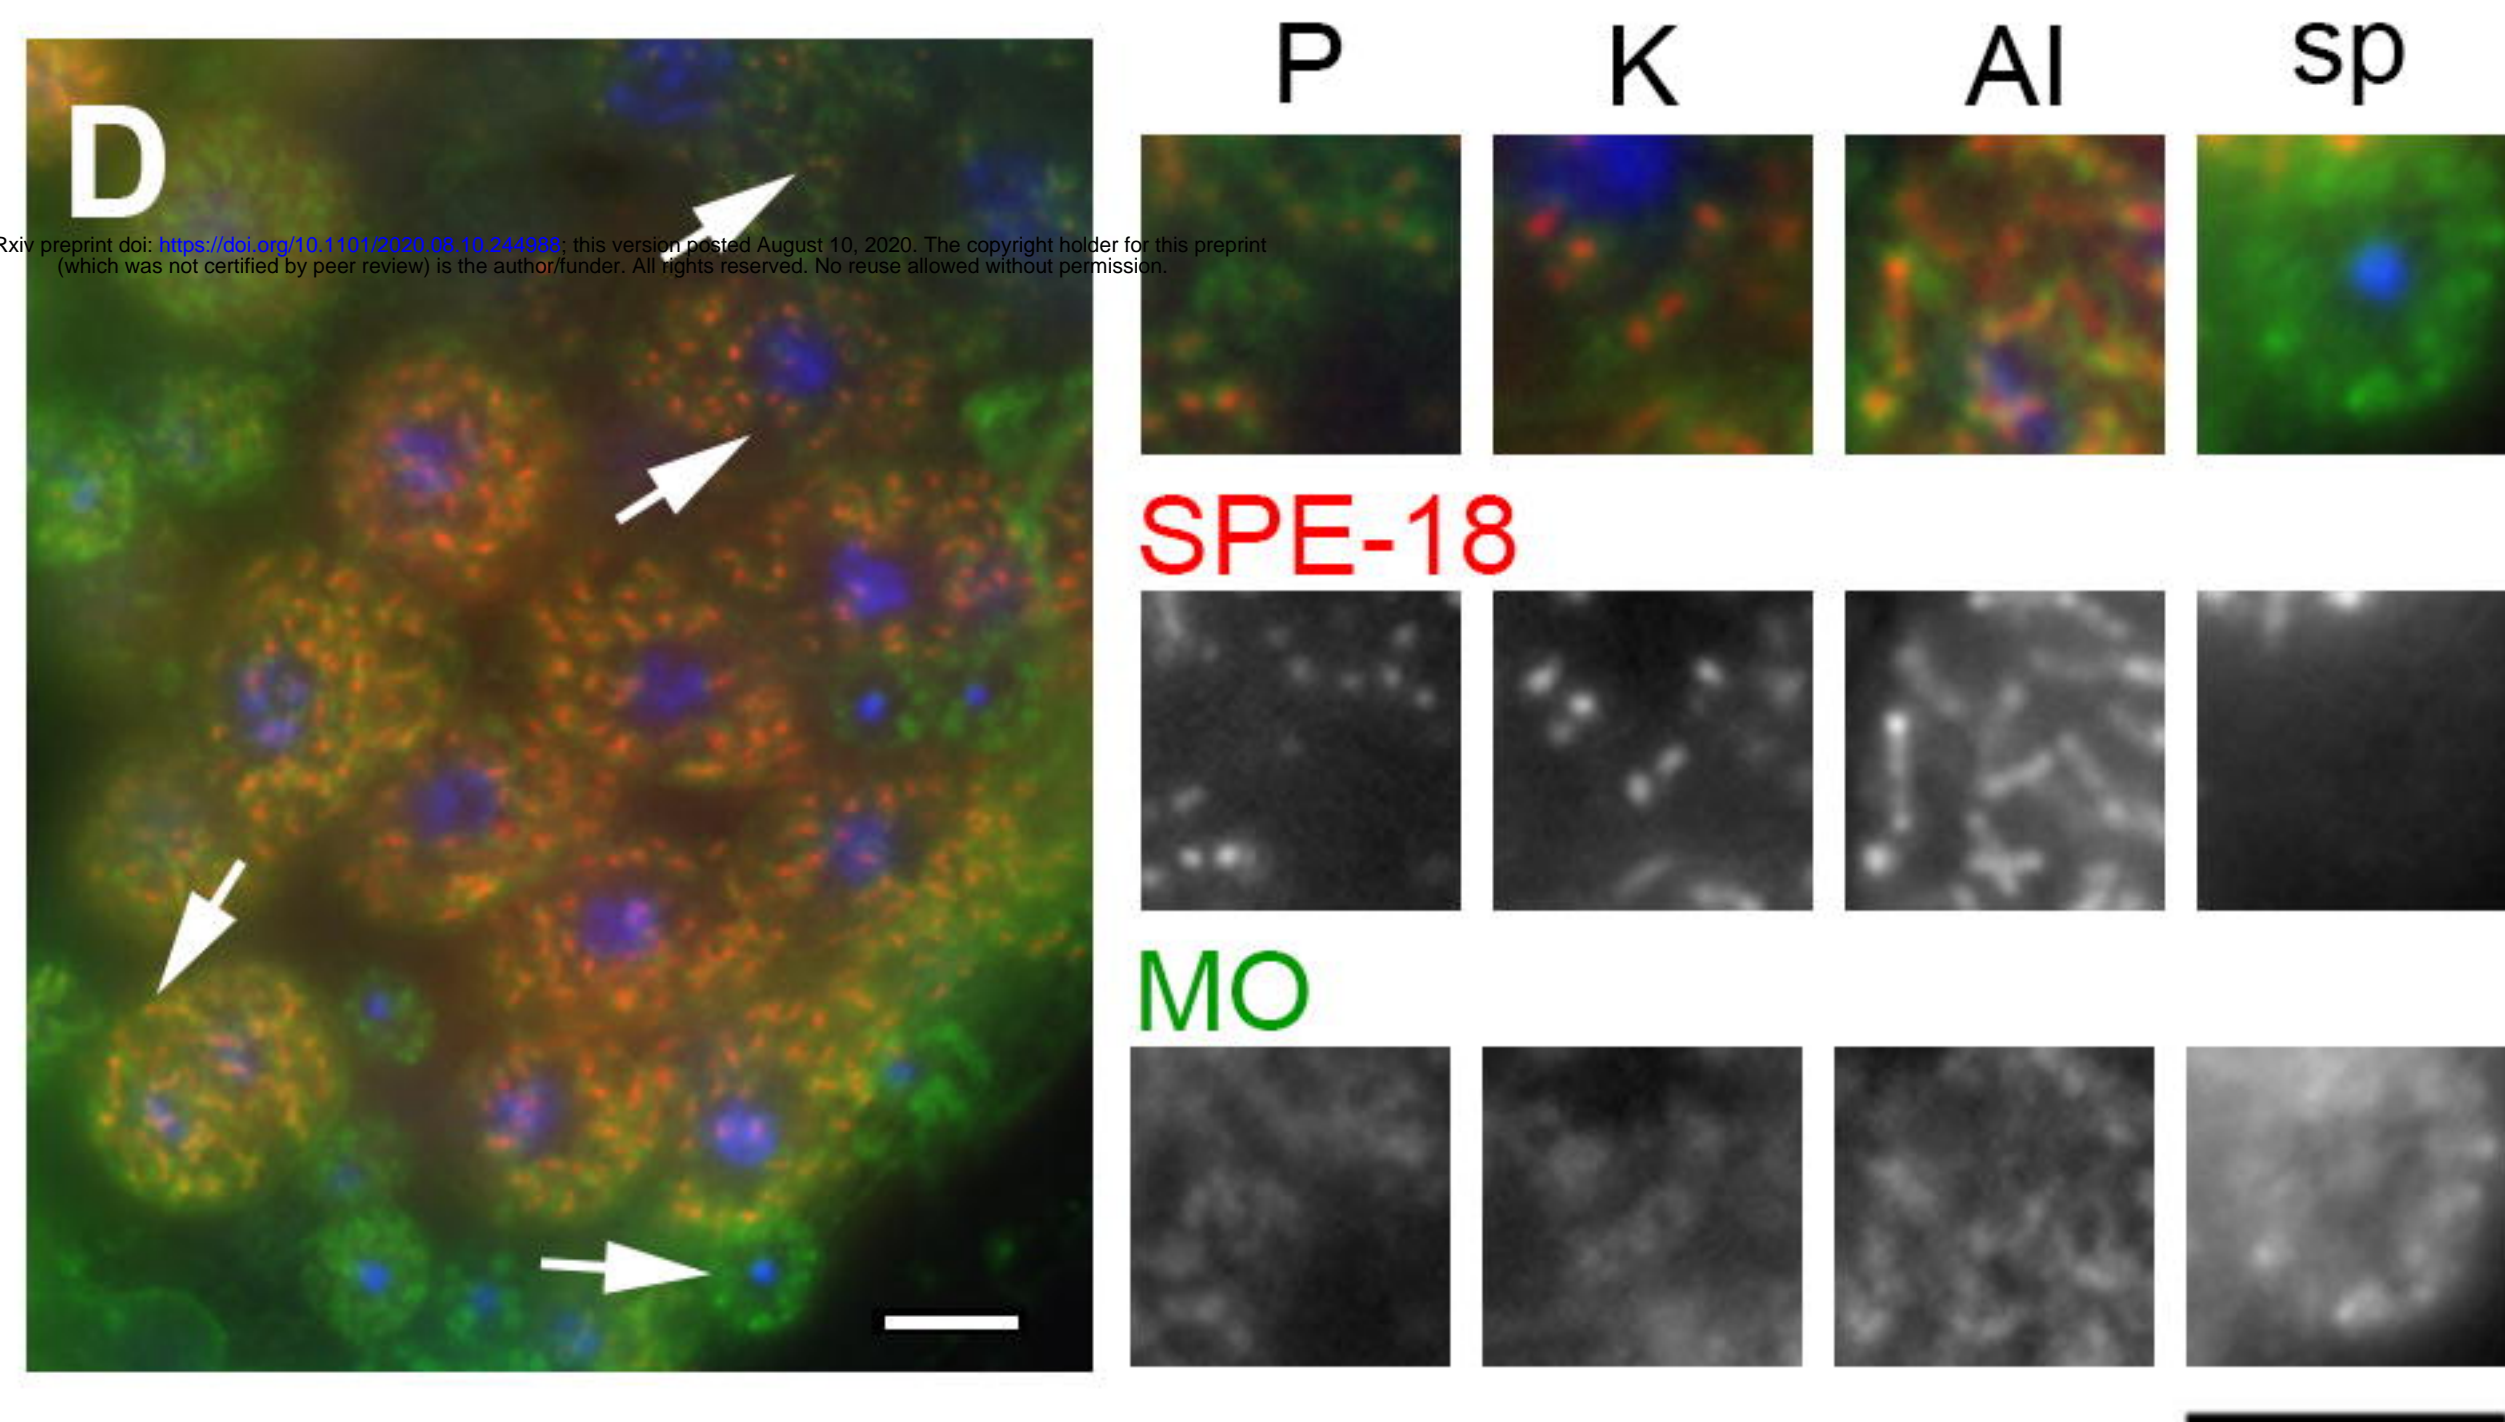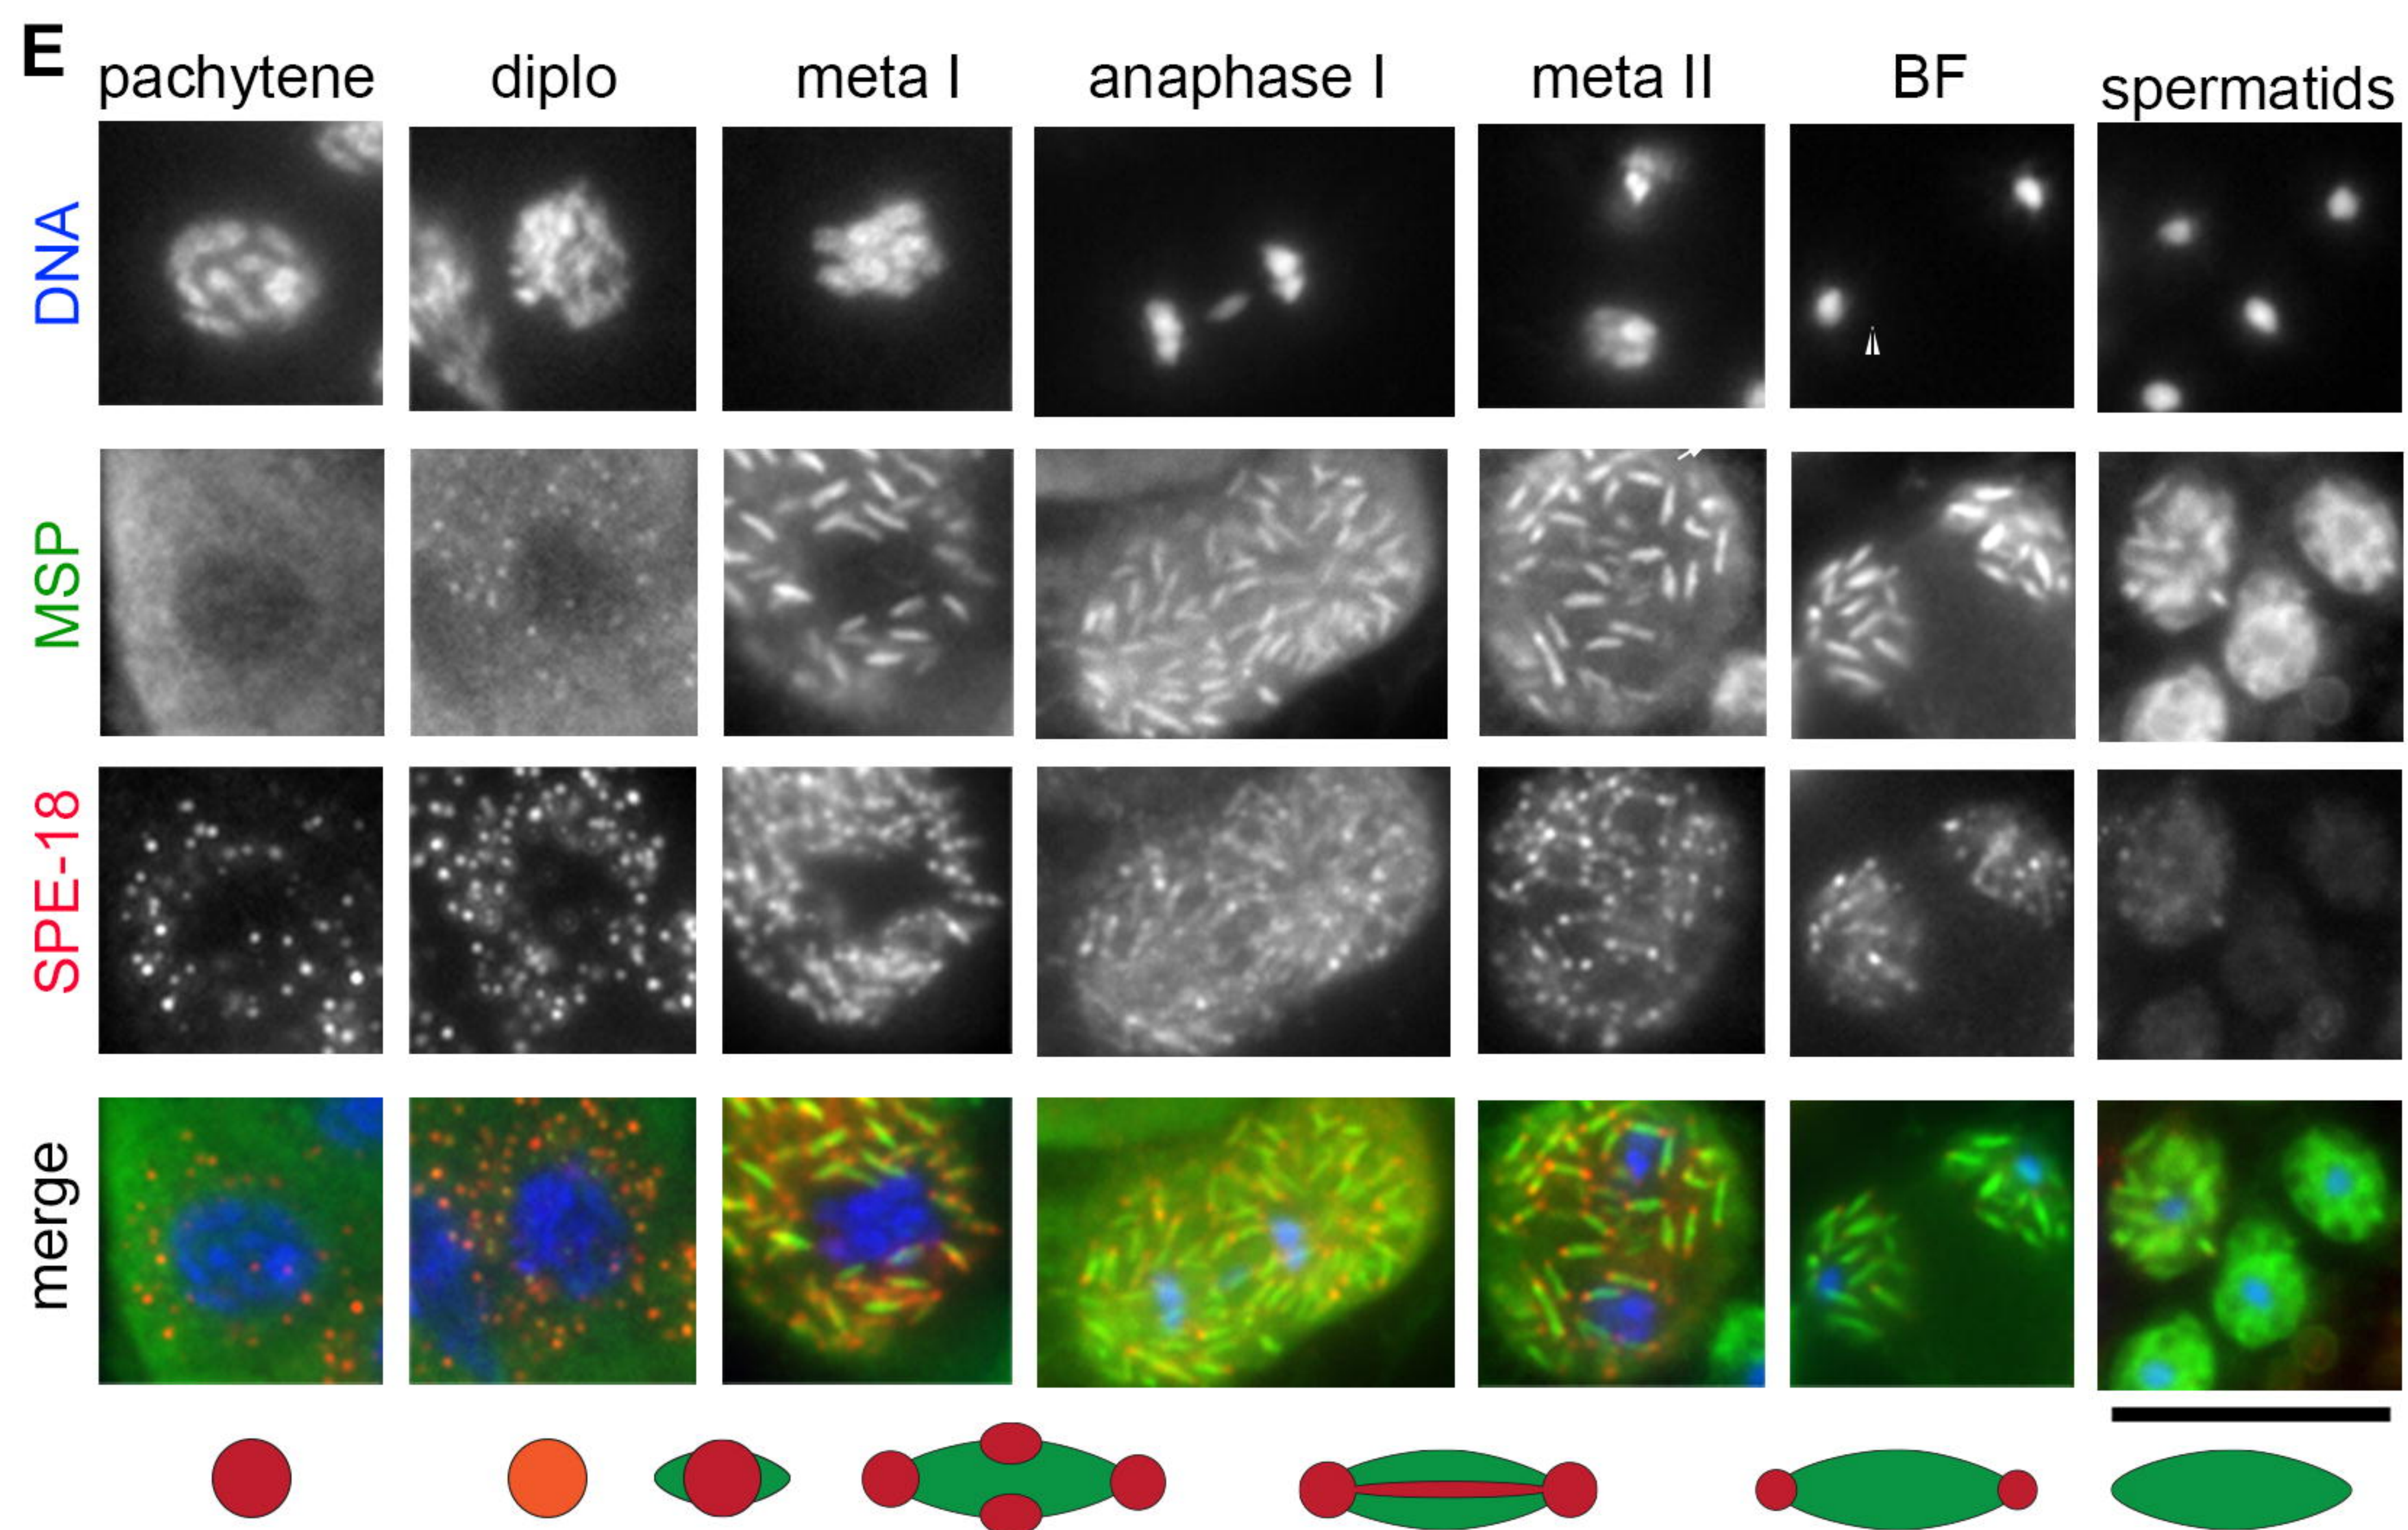

**Figure 4**

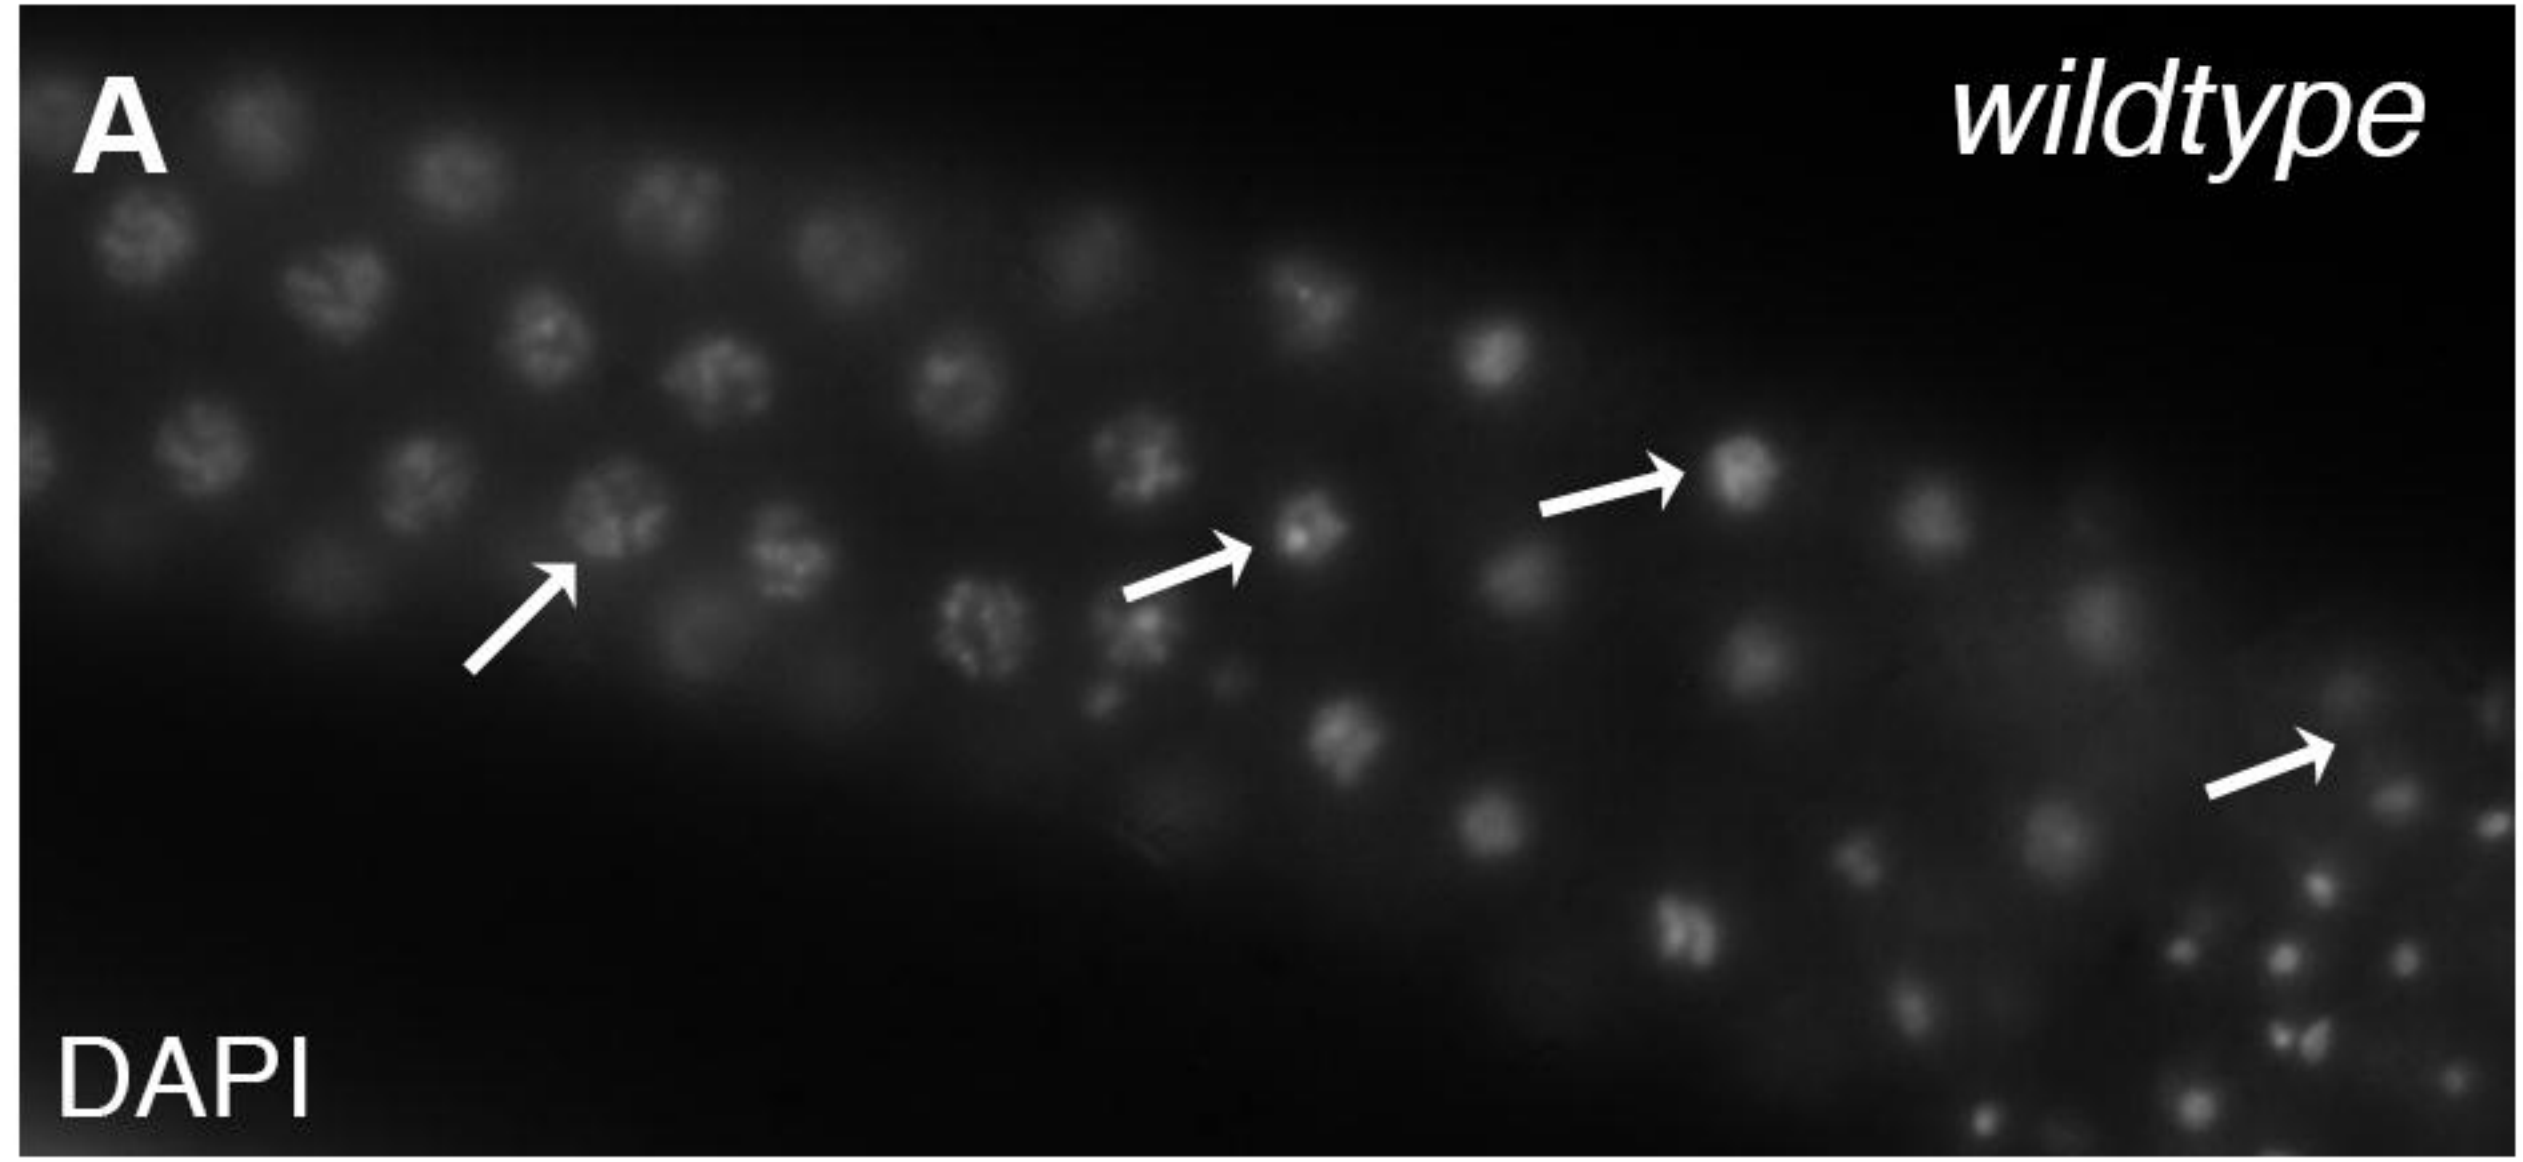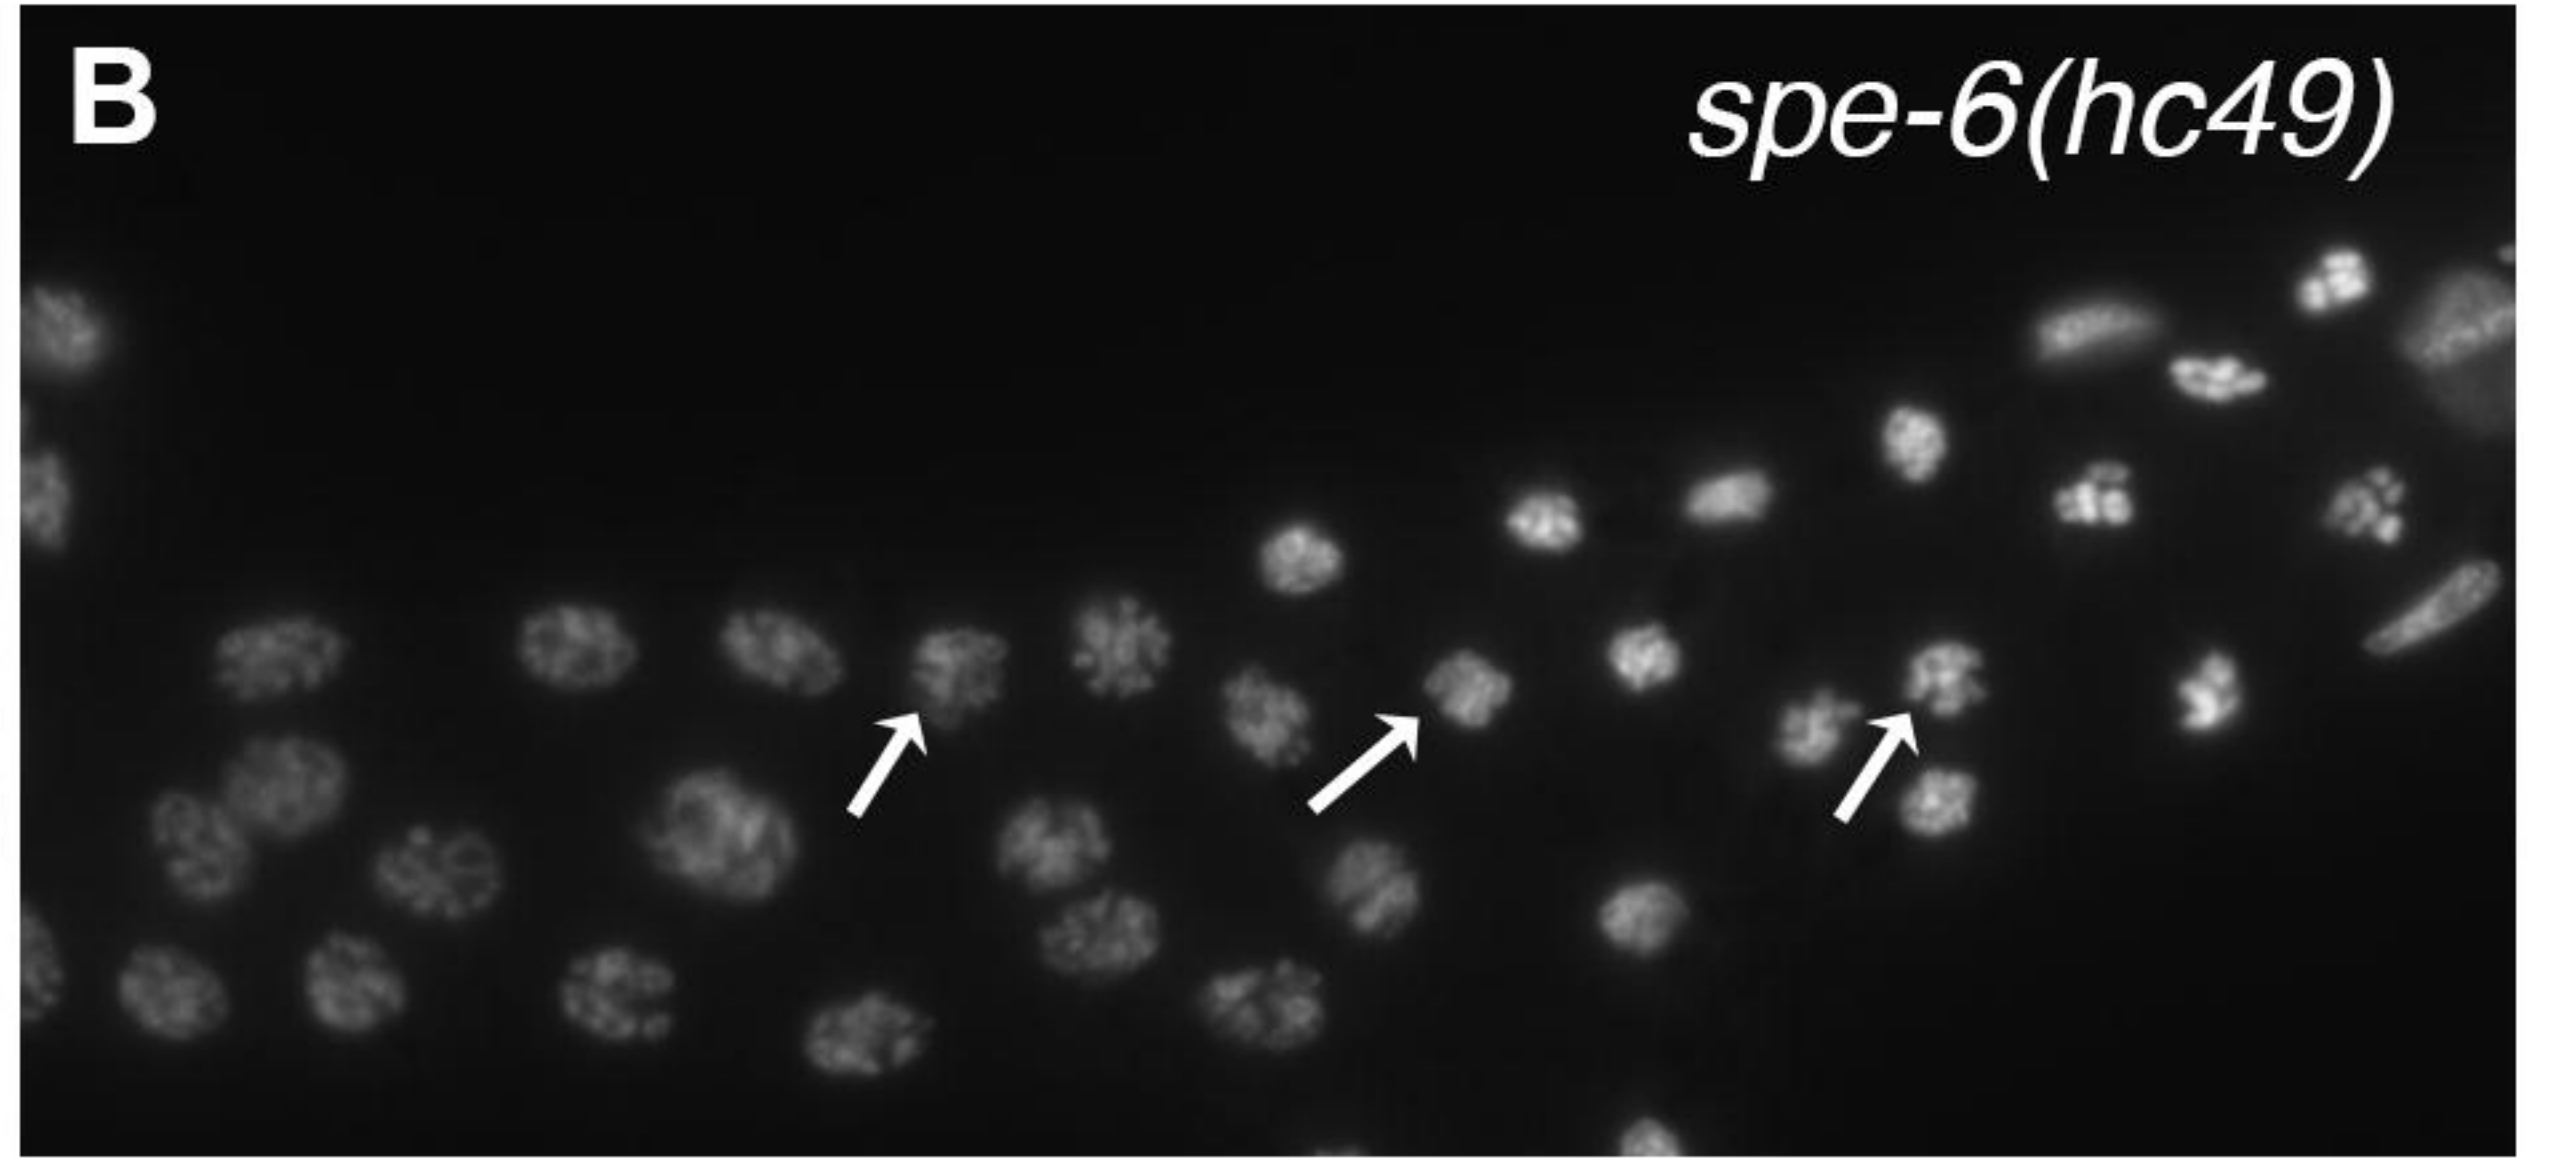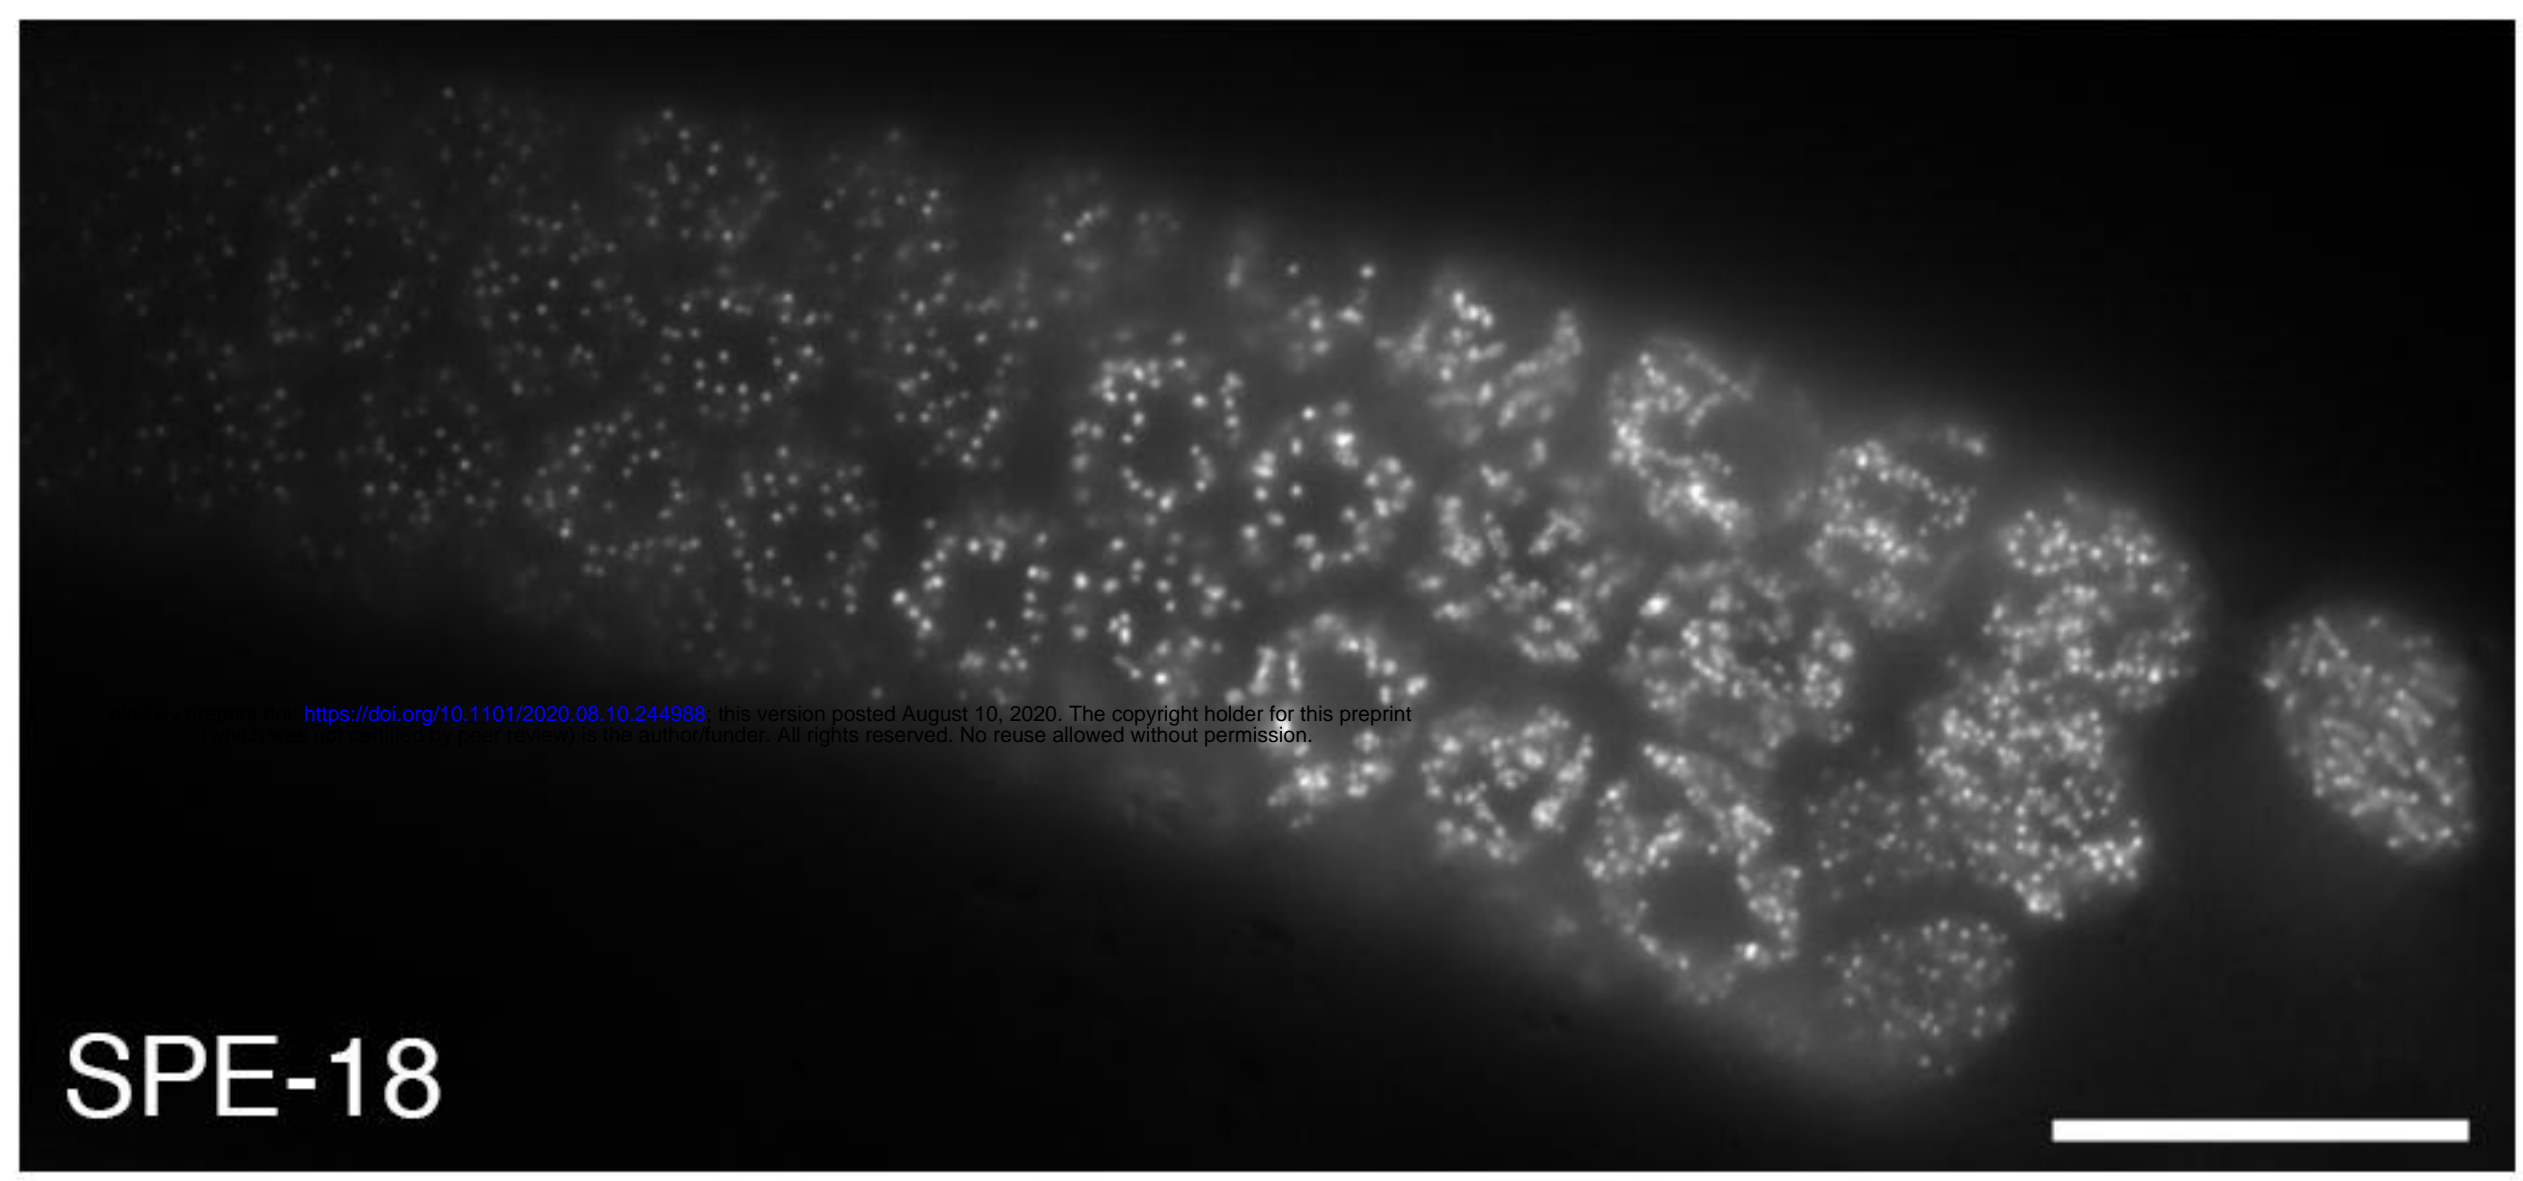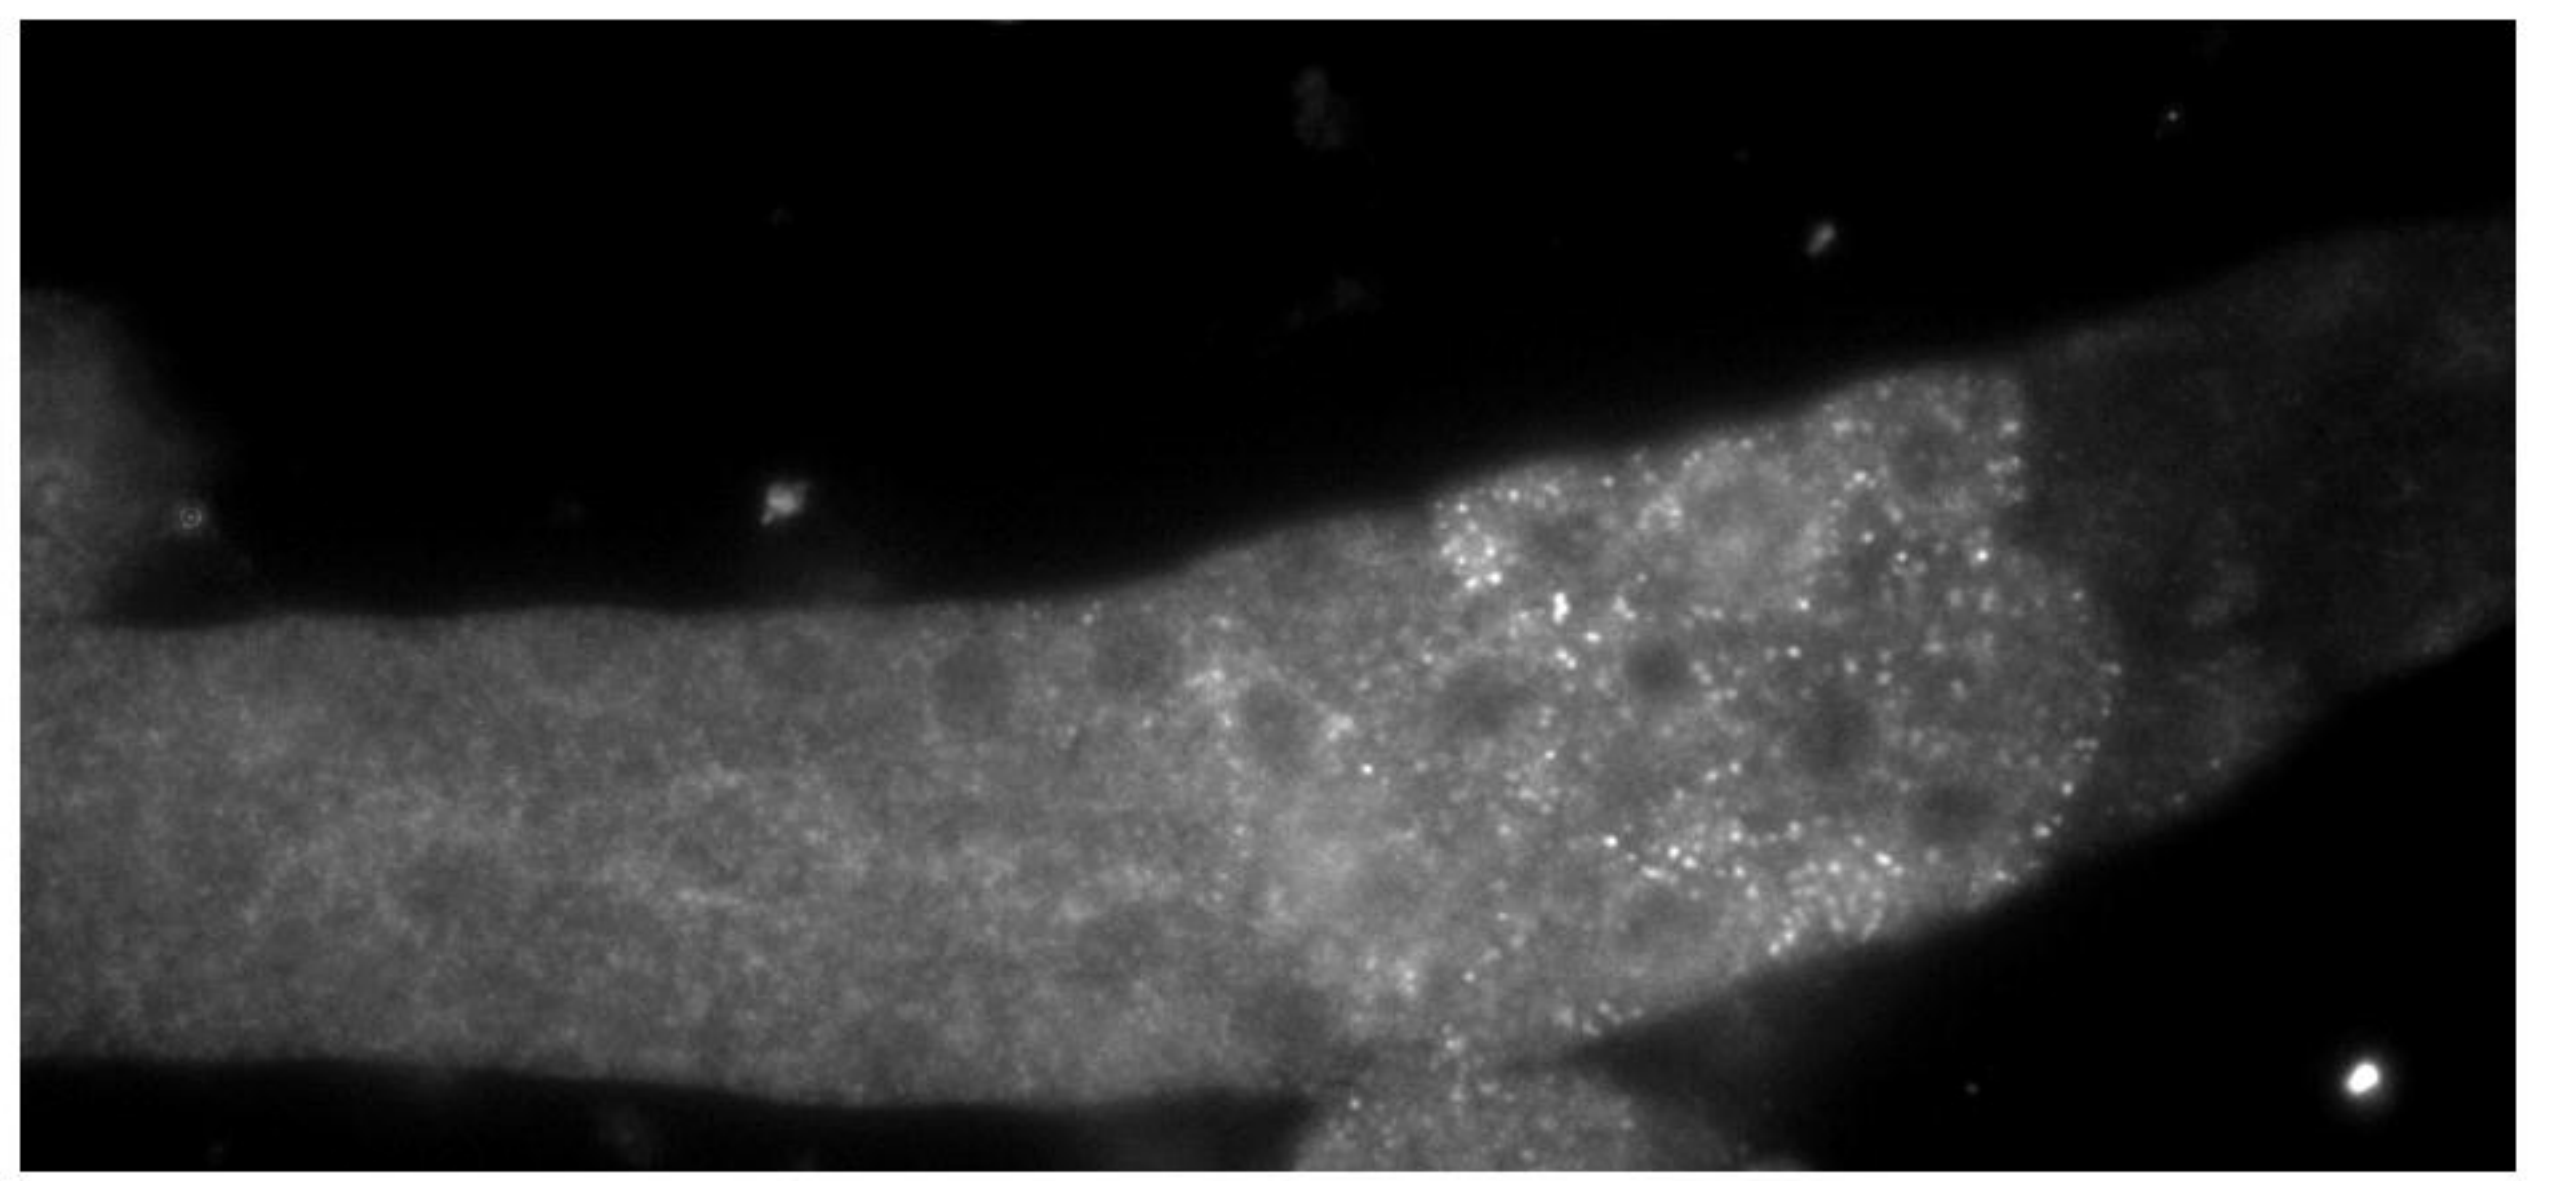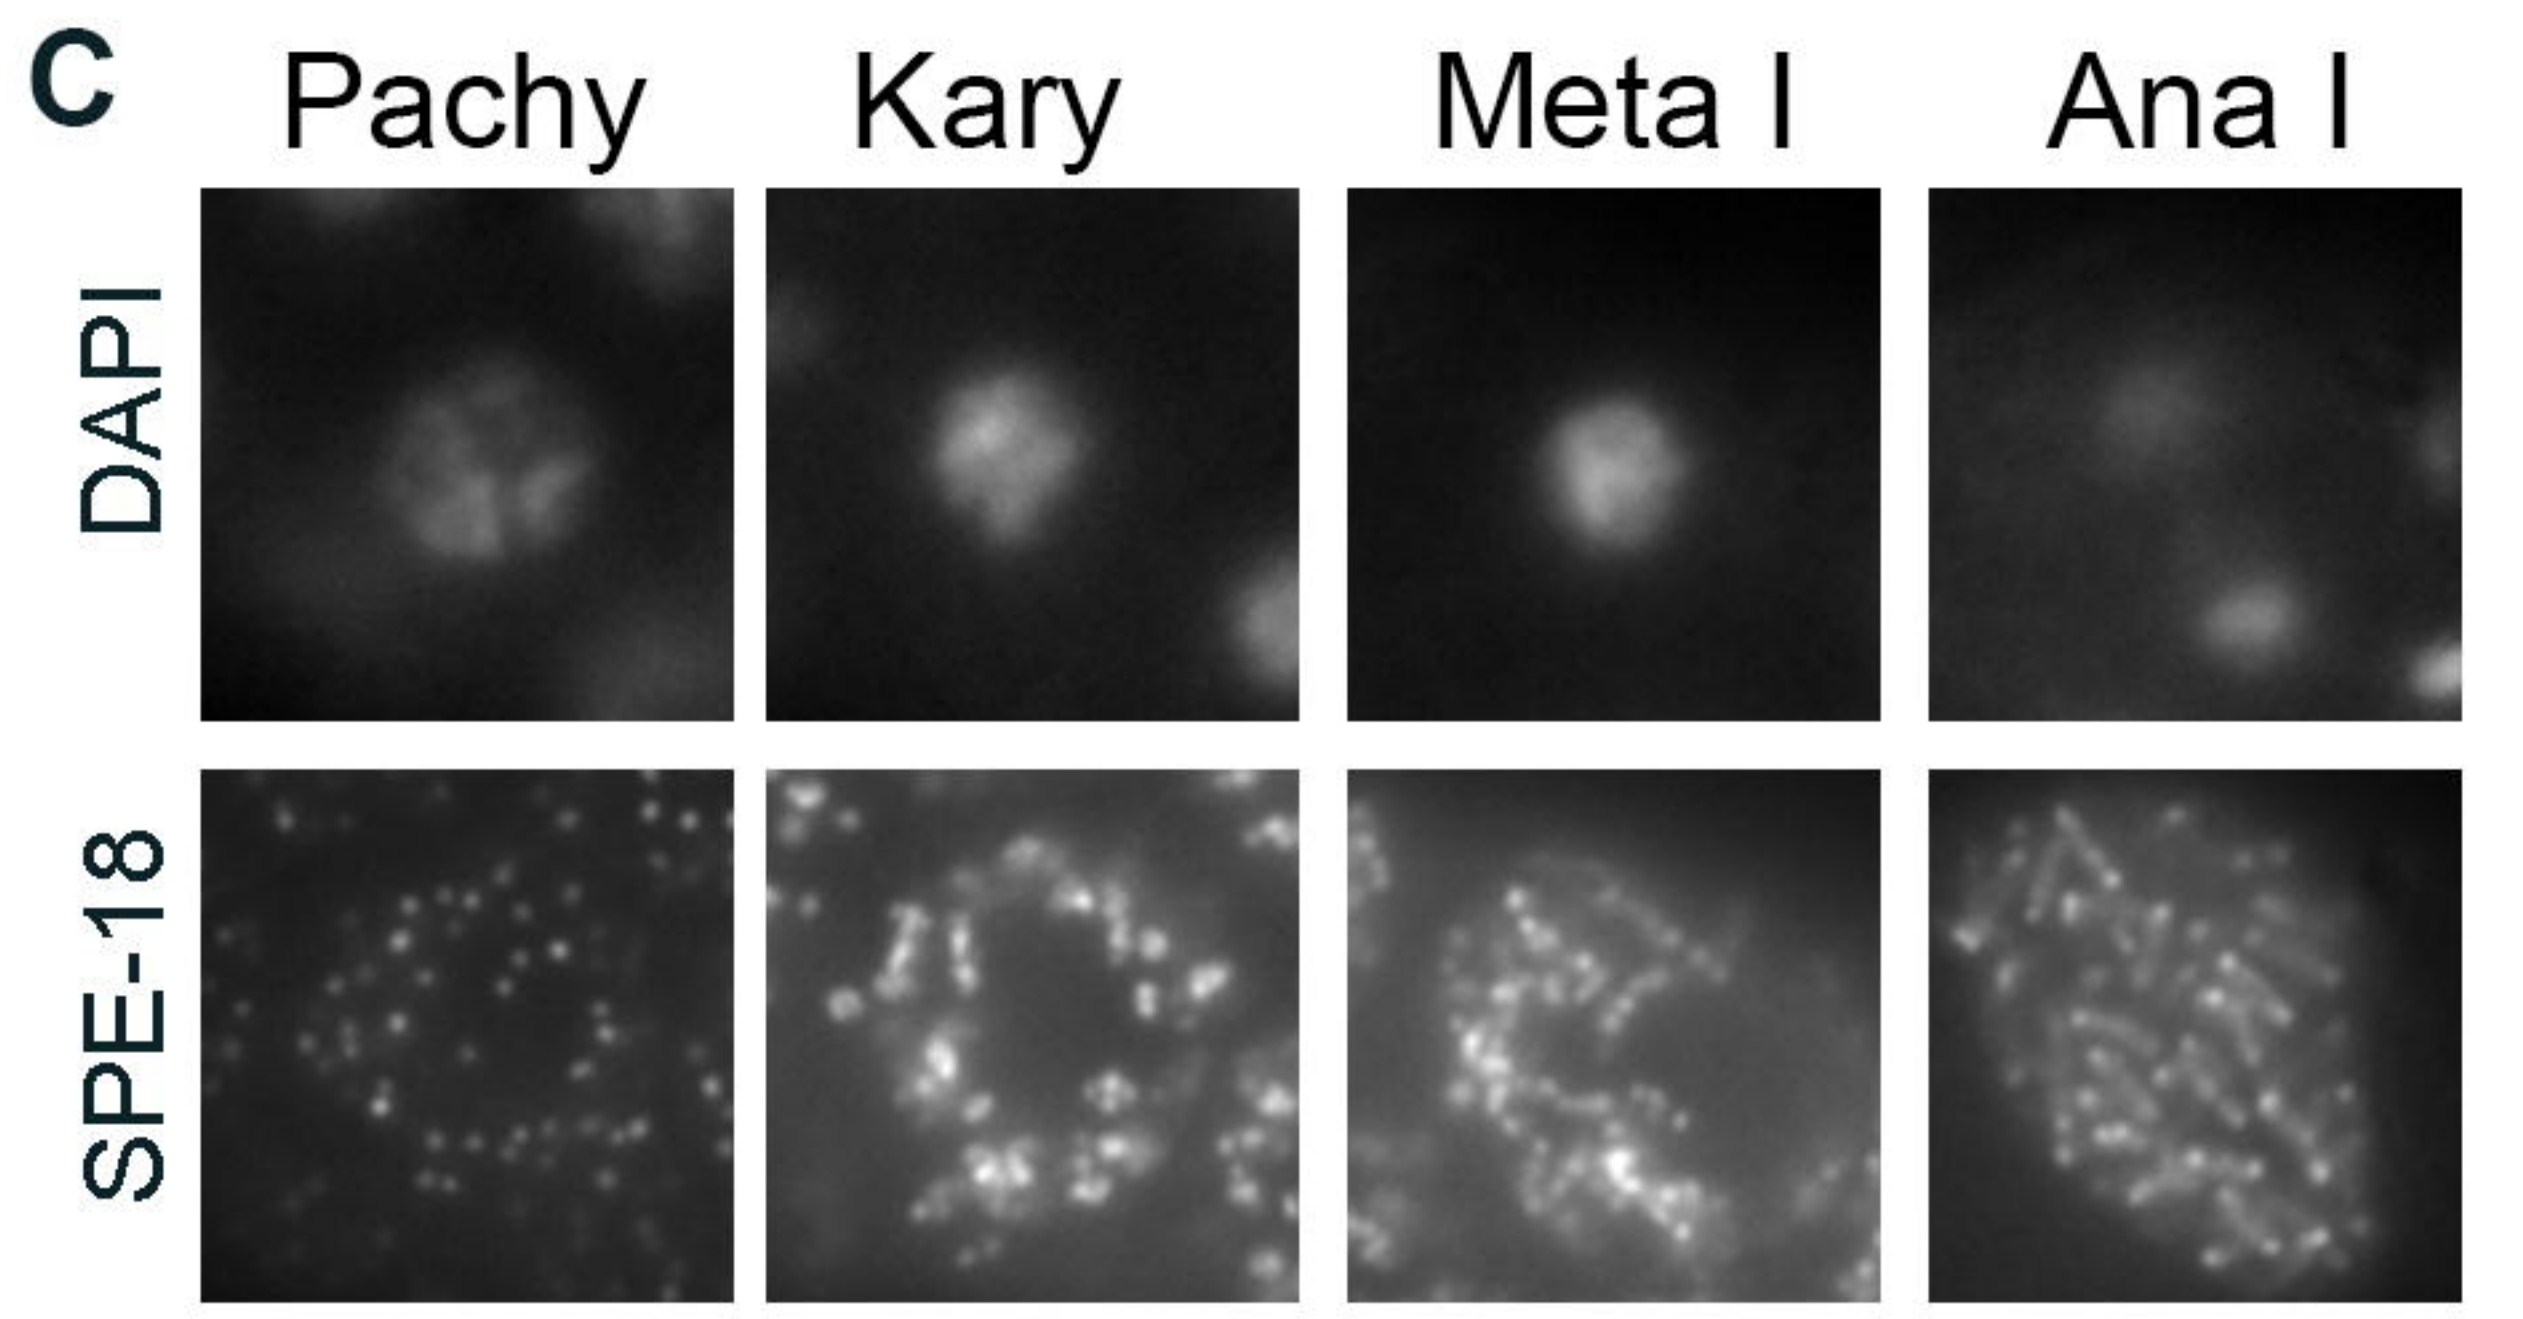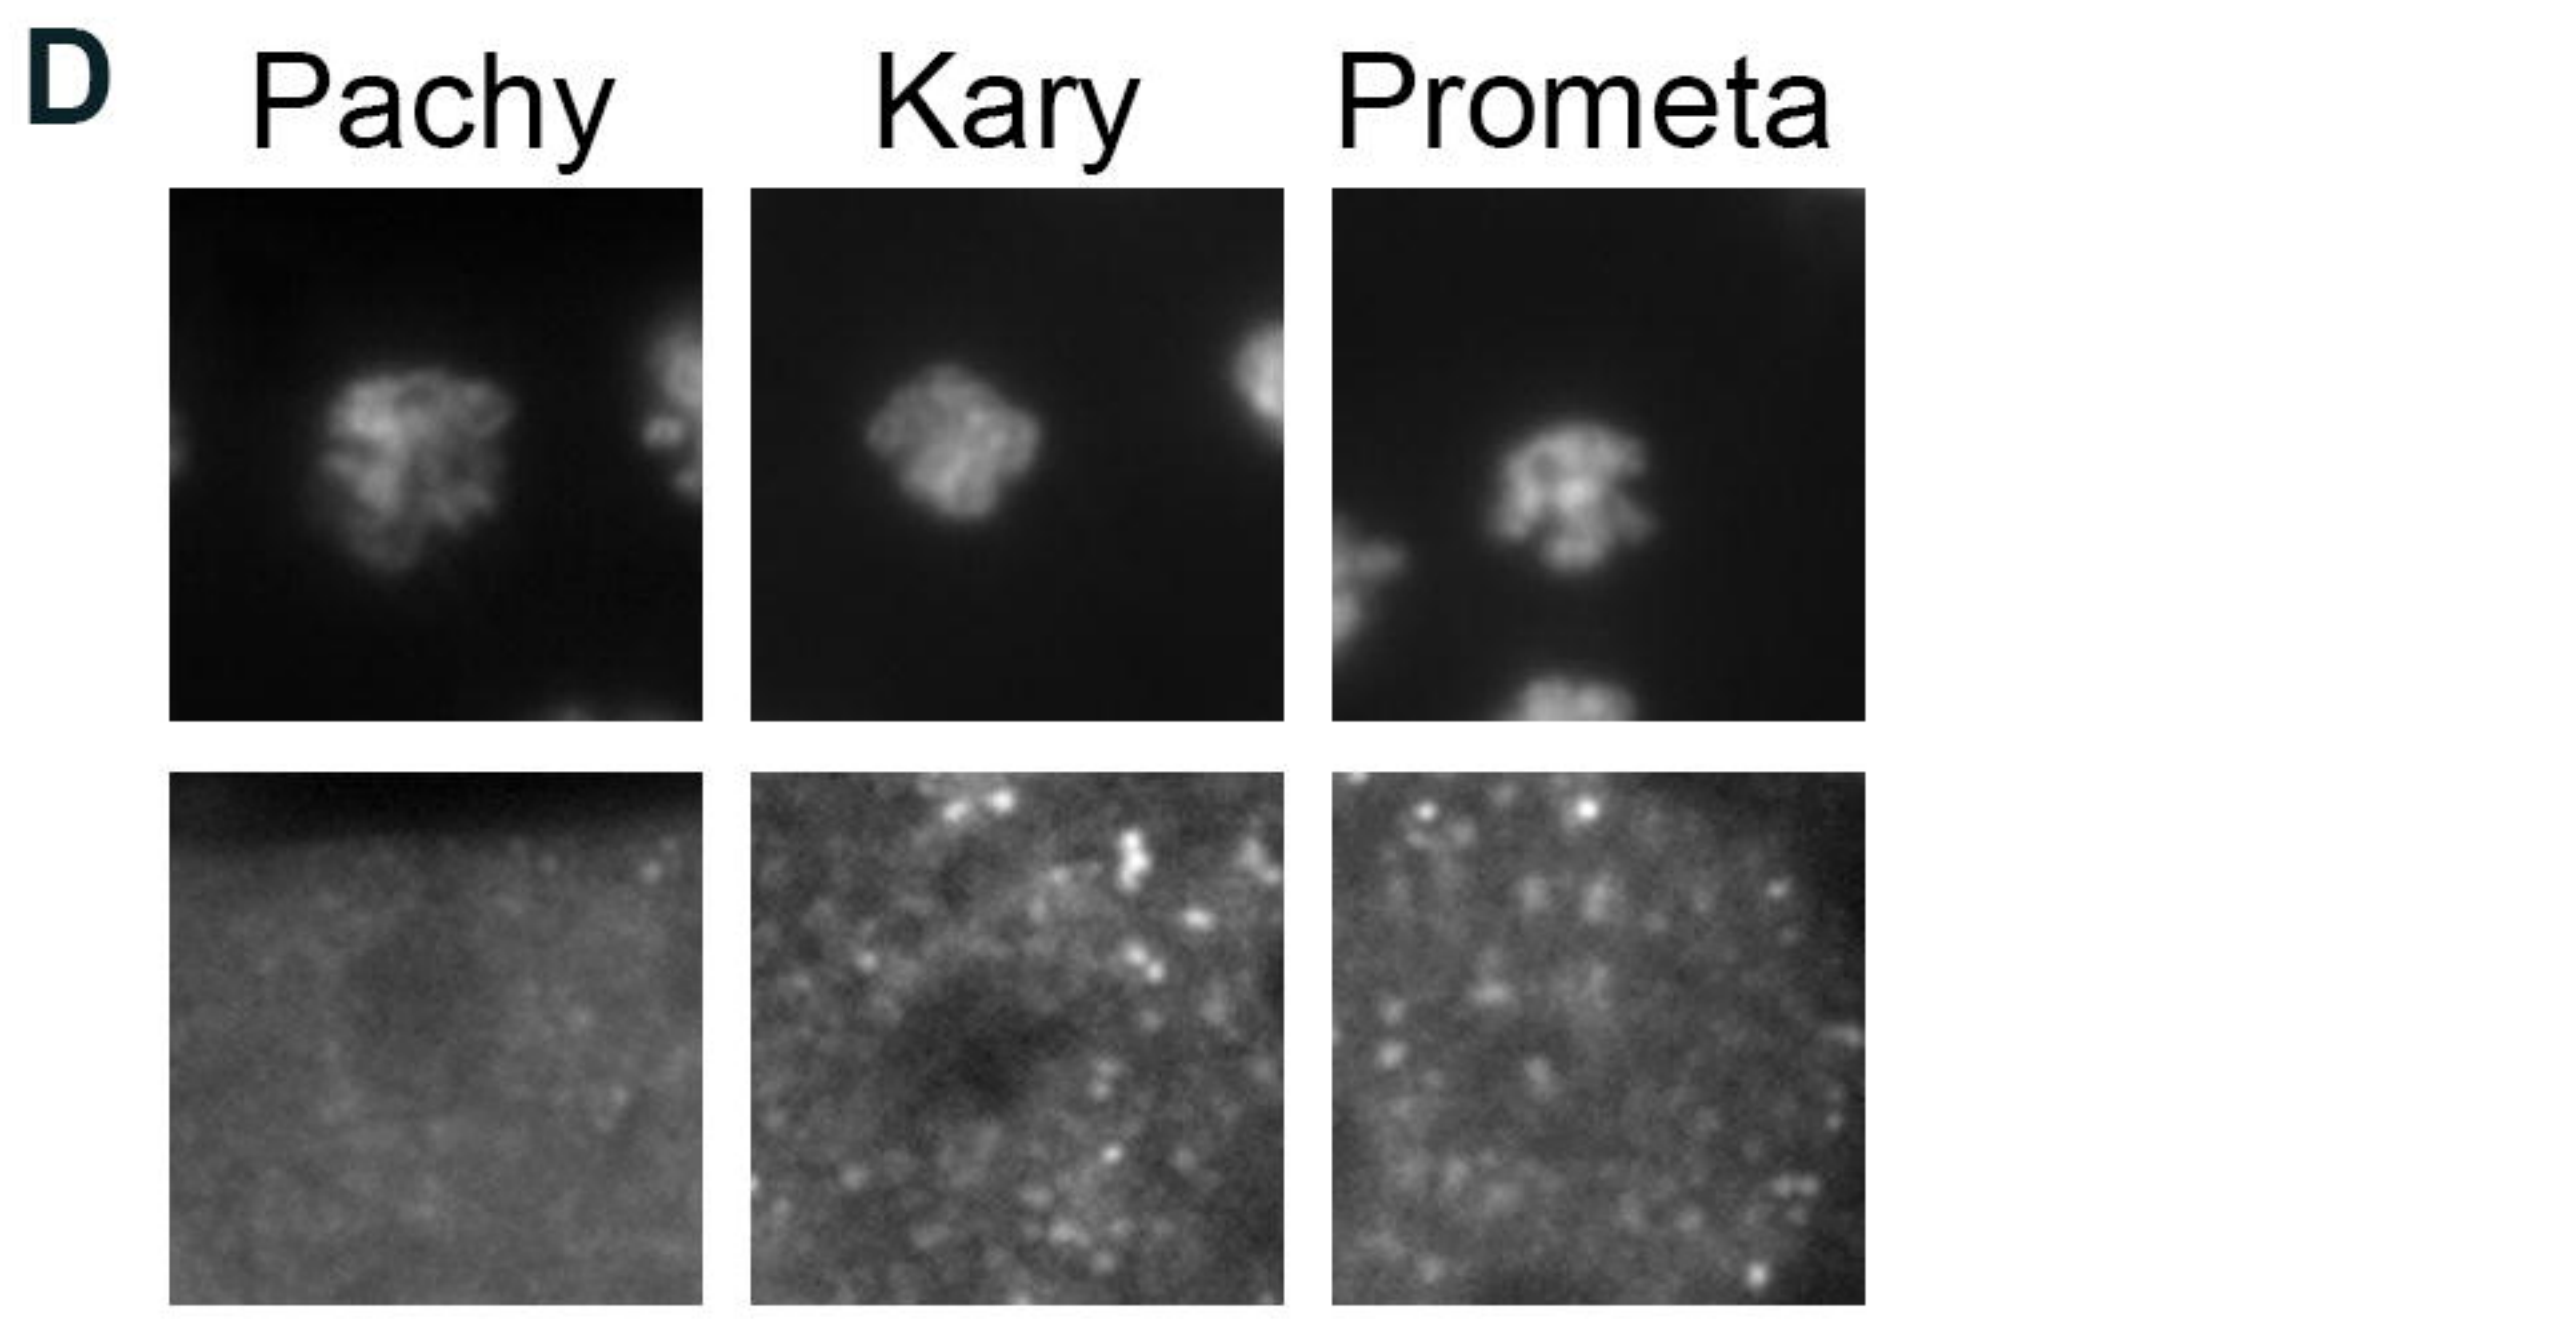

Figure 5

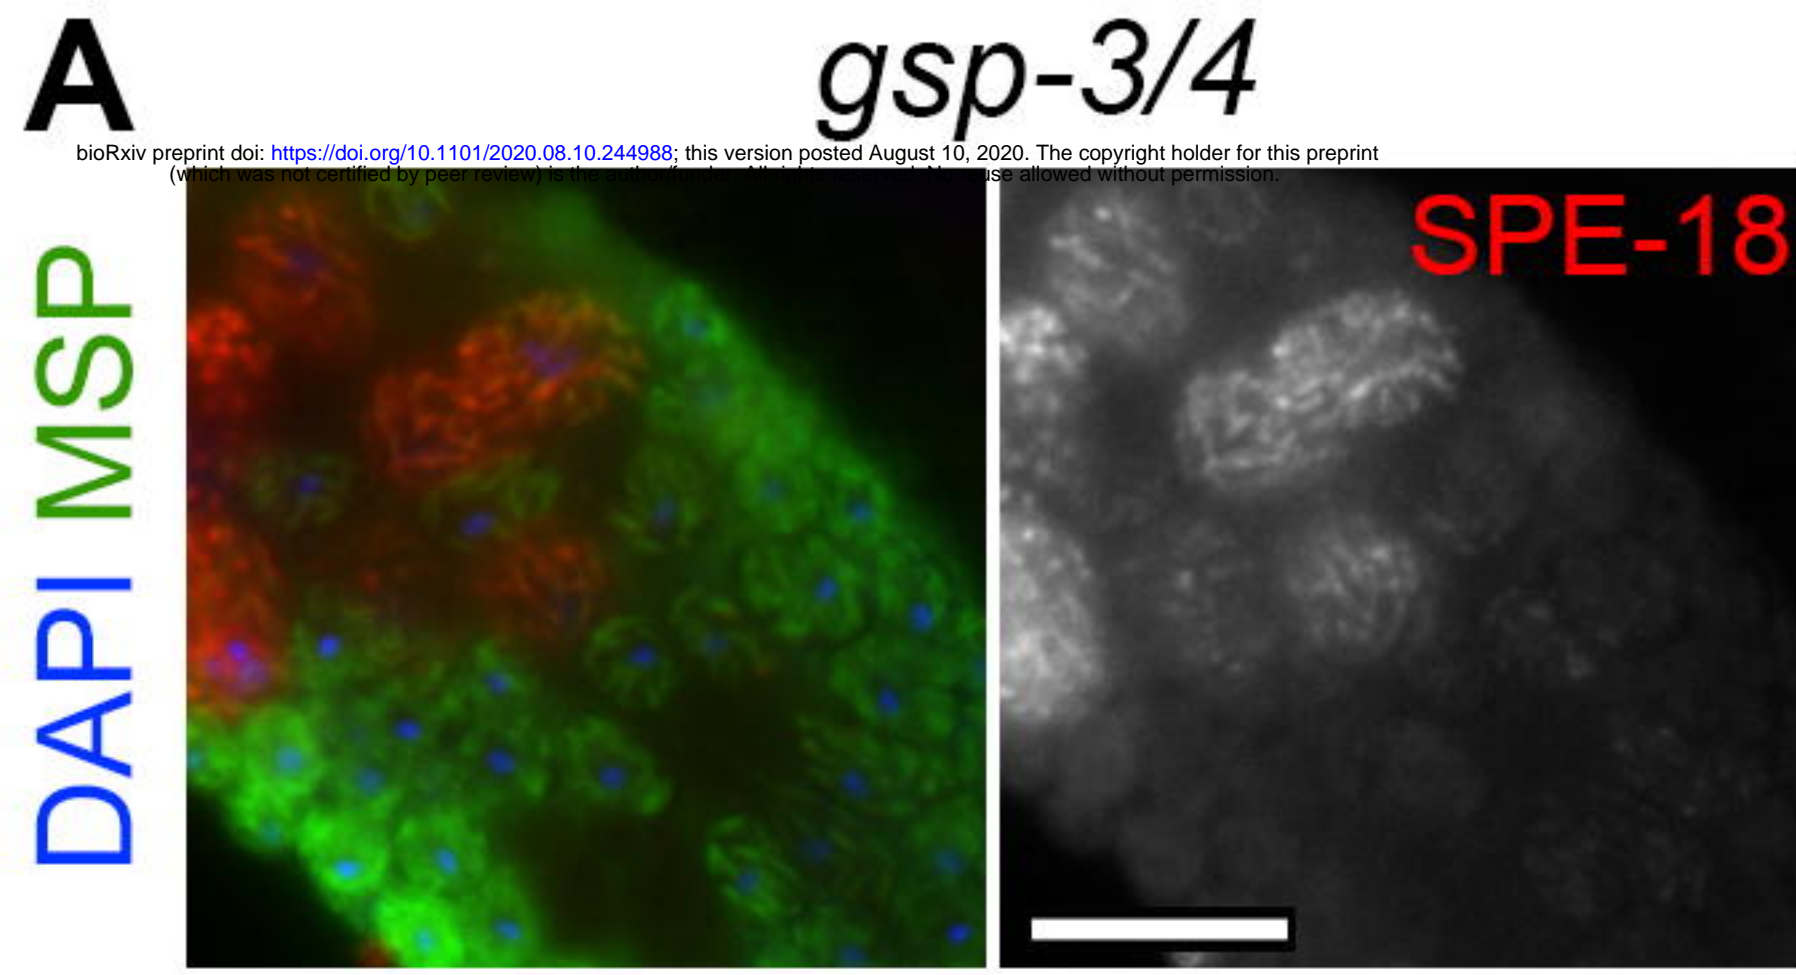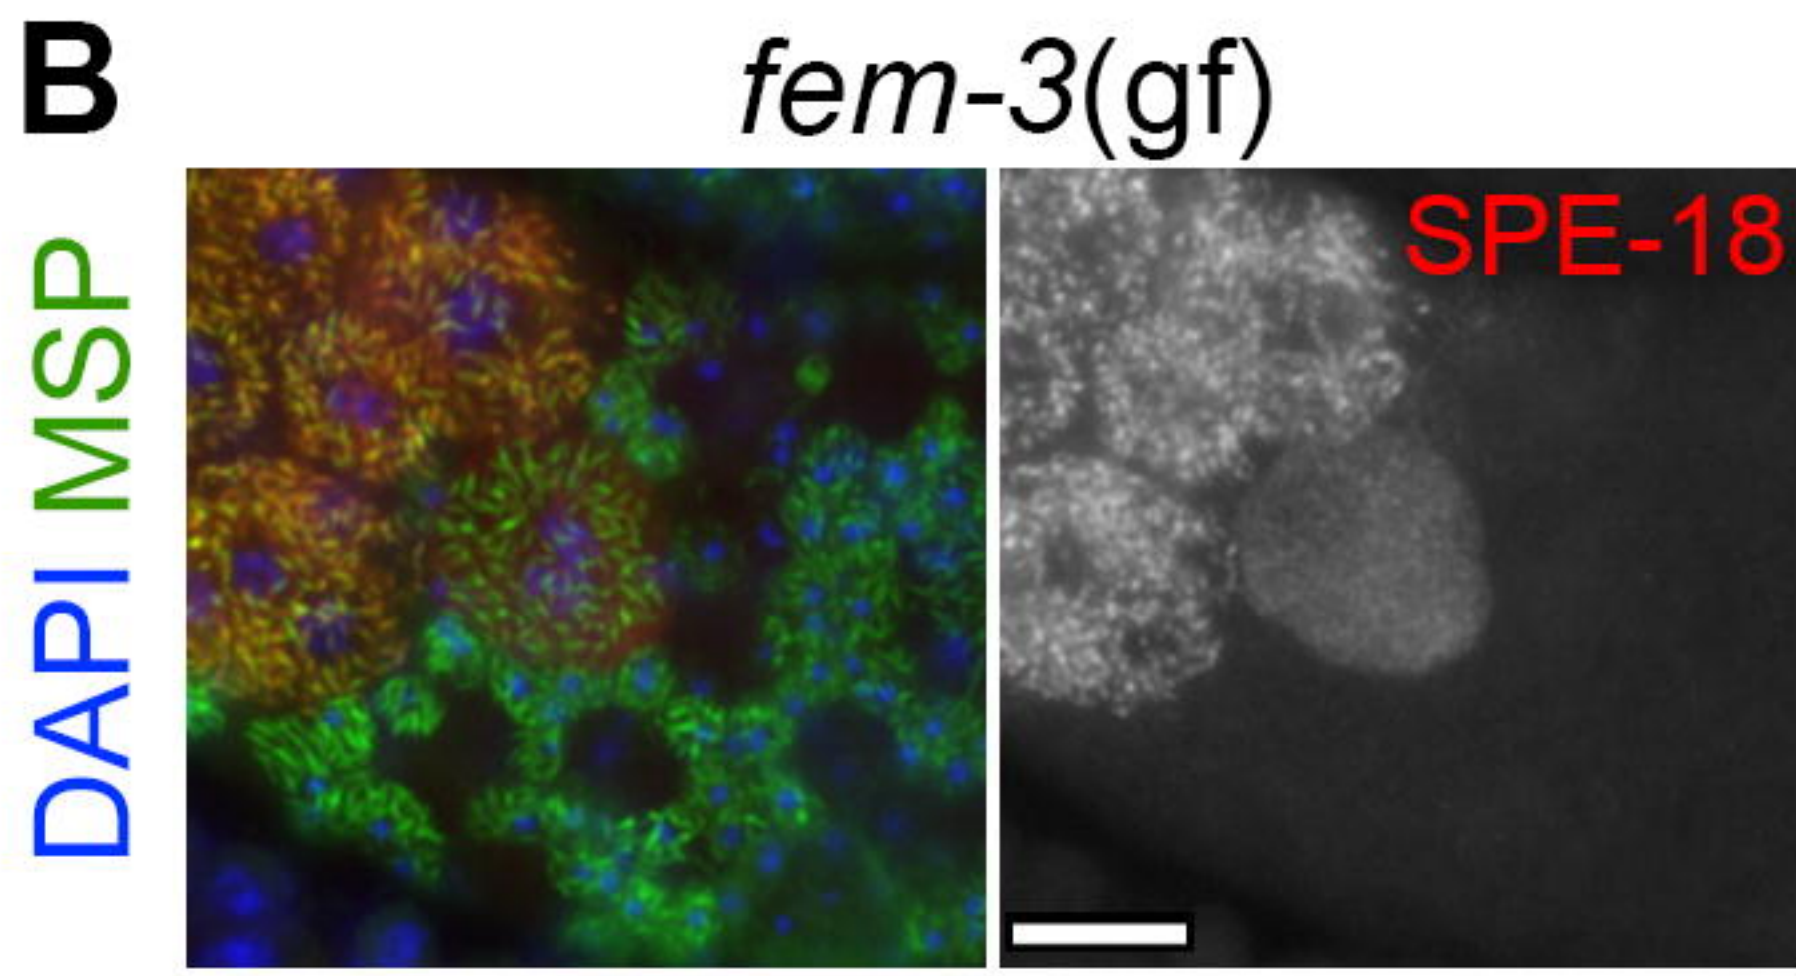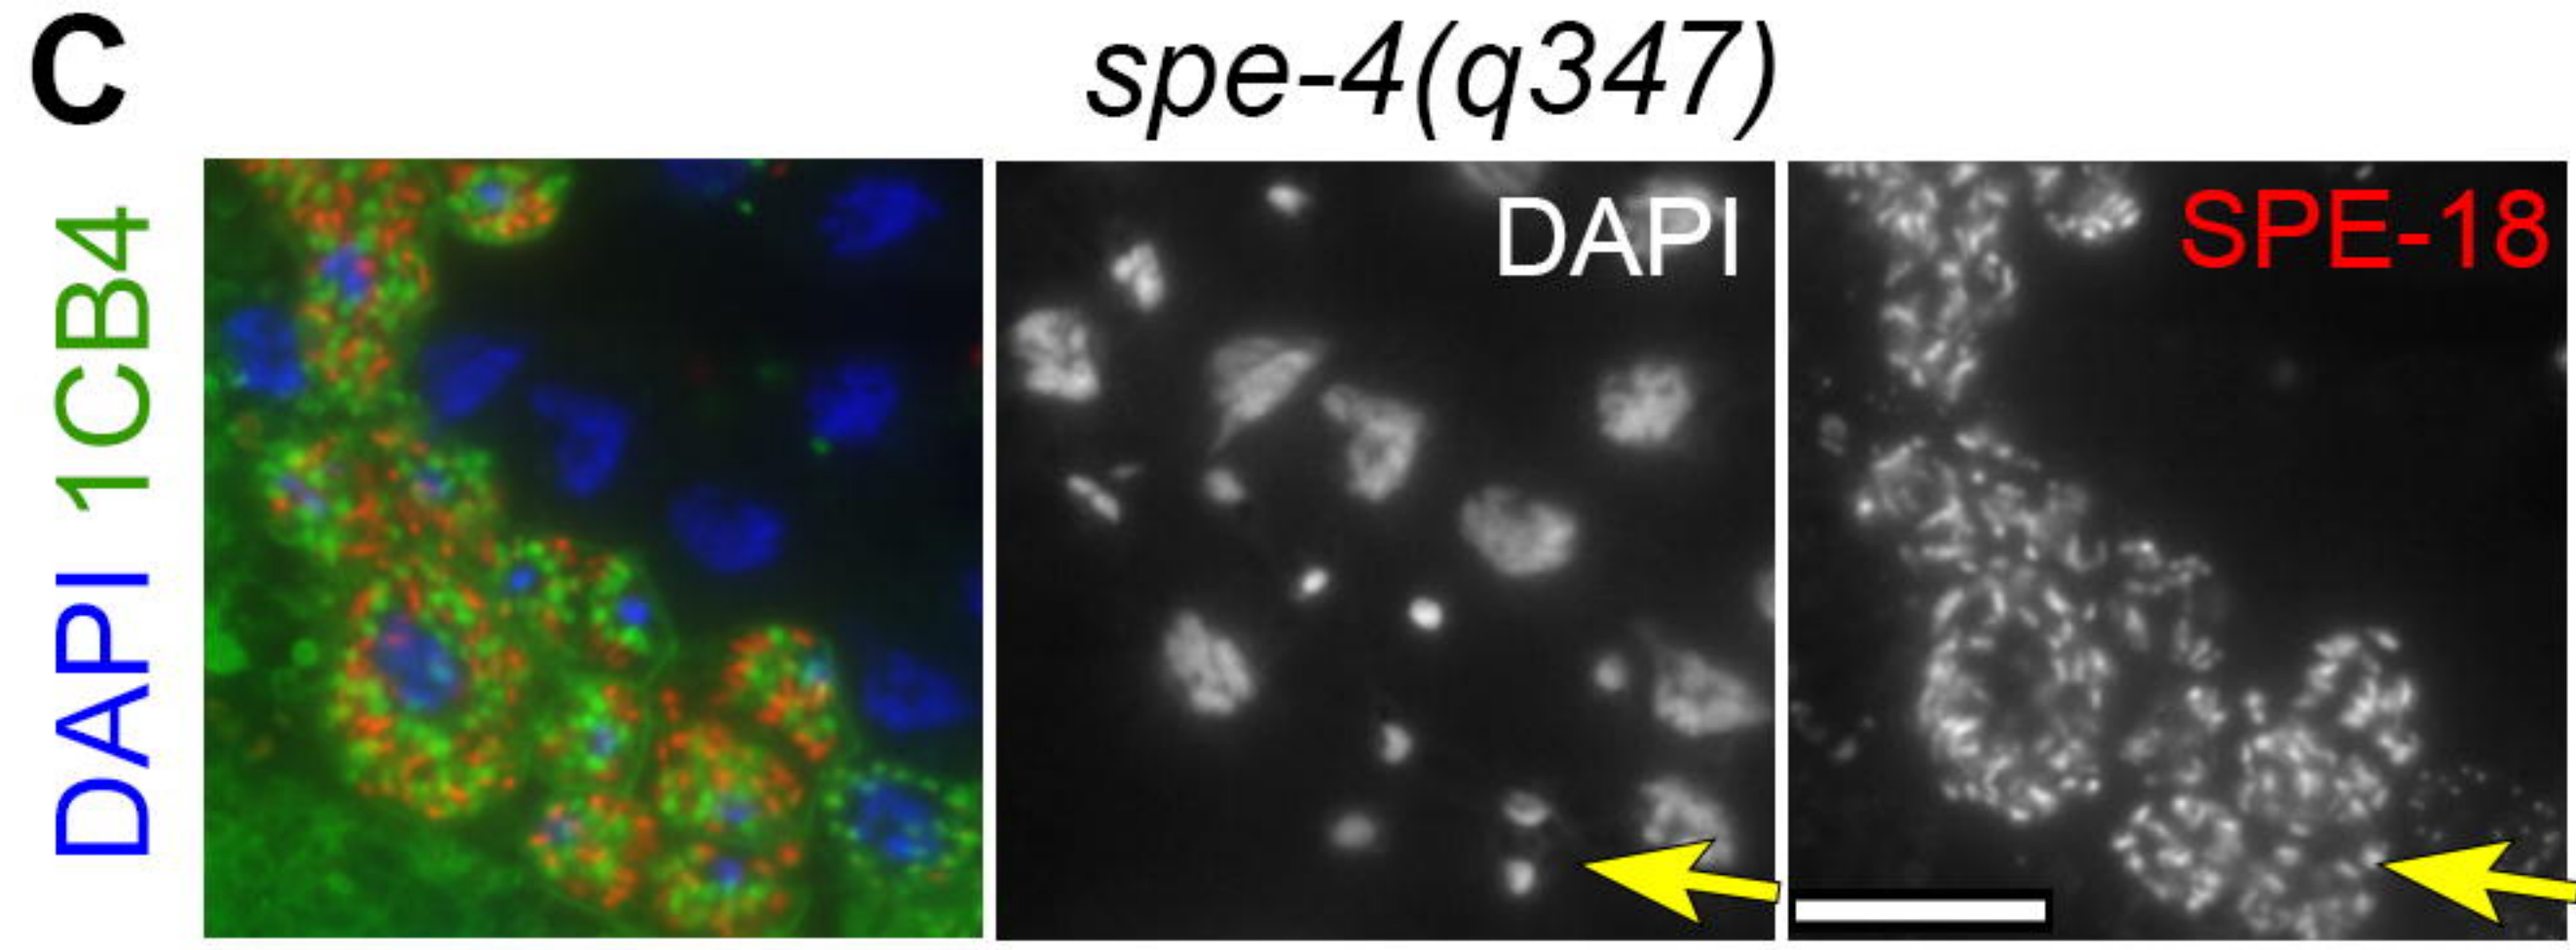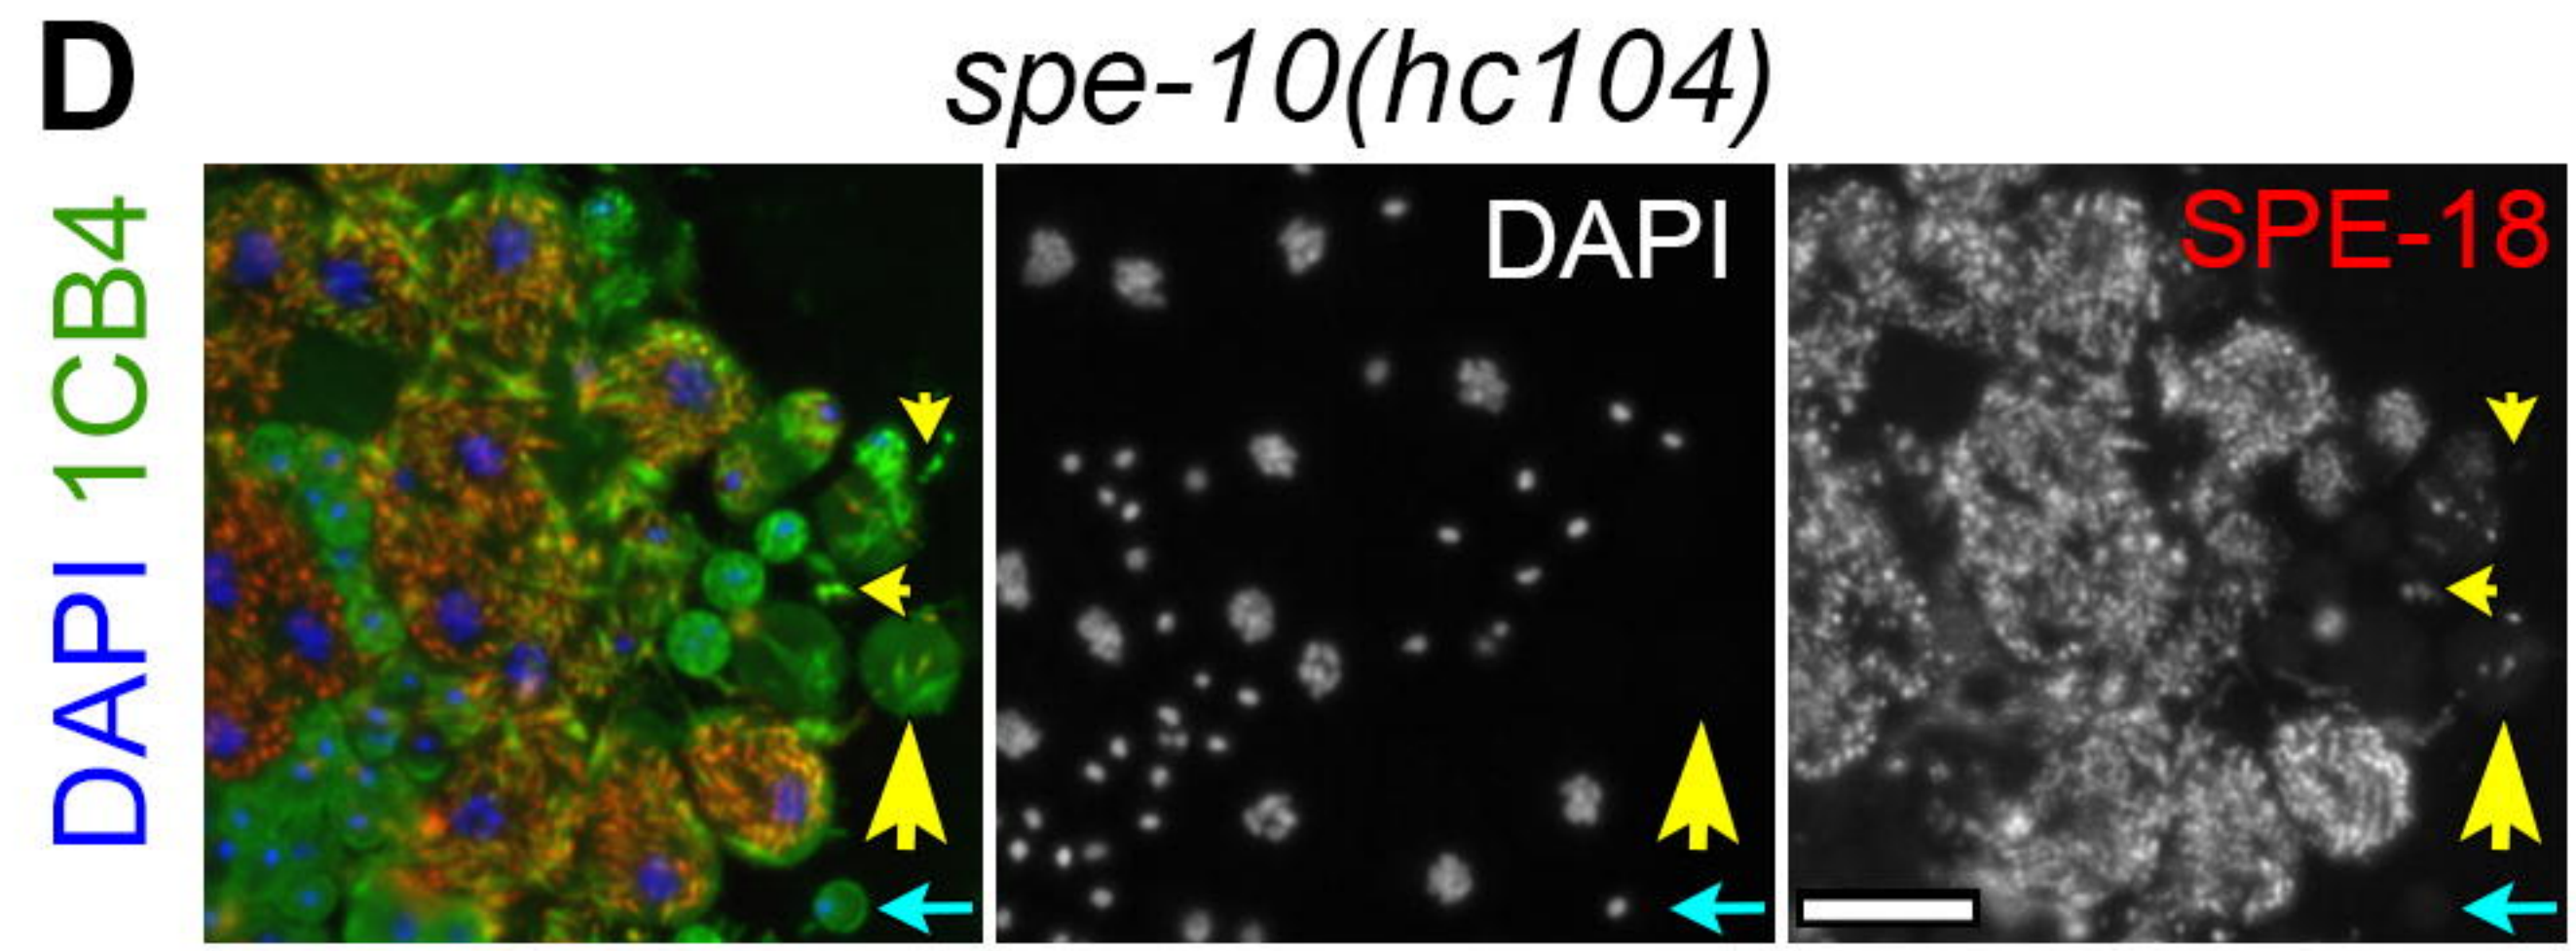

Figure 6

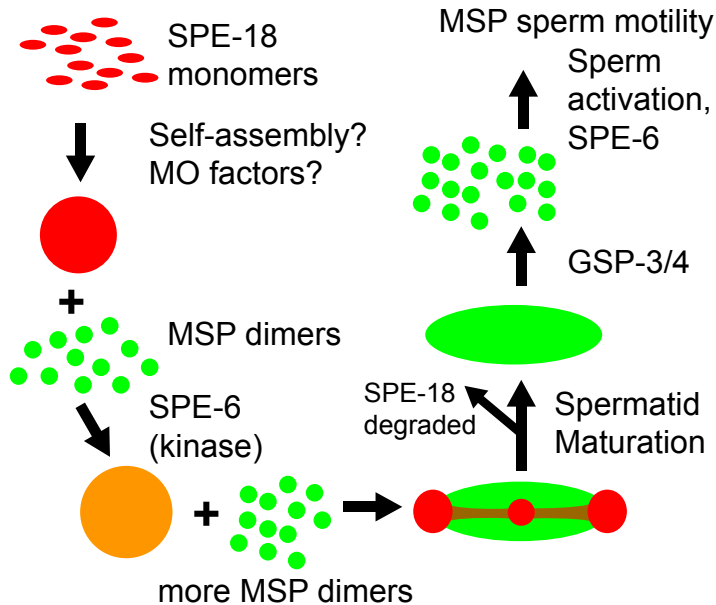

Figure 7
